# Supplementary material for: Extractable and Non-Extractable Antioxidants Composition in the eBASIS Database: A Key Tool for Dietary Assessment in Human Health and Disease Research
Source: Nutrients. 2020 Nov 6;12(11):3405. doi: 10.3390/nu12113405 (PMC7694646; doi:10.3390/nu12113405)
Supplement: Supplementary file 1 [file nutrients-12-03405-s001.xlsx]

## Sheet: eBASIS report 2020
Id	Plant name	Scientific name	Compound class	Level	Unit	Analytical method name	Part	Part: Shape, state or form	Plant description	EuroFIR classification	Heat treatment	Cooking method	Treatment applied	Preservation method	Compositional comments	Reference no	Author	Journal	Volume	Year	Title
51593	Acerola	Malpighia glabra L.	Extractable polyphenols (EPP)	102800	mg/kg DW	Folin-Ciocalteu assay	Fruit or berry	WHOLE		FRUIT OR FRUIT PRODUCT	NOT HEAT-TREATED	RAW MATERIAL	NO TREATMENT APPLIED	NO PRESERVATION METHOD USED		C1300	Rufino,M.S.M., Alves,R.E., de Brito,E.S., Pérez-Jiménez,J., Saura-Calixto,F., Mancini-Filho,J.	Food Chemistry	121	2010	Bioactive compounds and antioxidant capacities of 18 non-traditional tropical fruits from Brazil
52092	Acerola	Malpighia glabra L.	Extractable polyphenols (EPP)	816550	µmole/kg DW	ORAC assay	Fruit or berry	WHOLE	Pulp was kept, and seed were discarded	FRUIT OR FRUIT PRODUCT	NOT HEAT-TREATED	RAW MATERIAL	NO TREATMENT APPLIED	NO PRESERVATION METHOD USED		C1309	Rufino,M., Pérez‐Jiménez, J., Tabernero,M., Ricardo,E.,De Brito,E., Saura‐Calixto,F.	International Journal of Food Science & Technology	45	2010	Acerola and cashew apple as sources of antioxidants and dietary fibre
51595	Acerola	Malpighia glabra L.	Extractable polyphenols (EPP)	953000	µmole/kg DW	ABTS assay	Fruit or berry	WHOLE		FRUIT OR FRUIT PRODUCT	NOT HEAT-TREATED	RAW MATERIAL	NO TREATMENT APPLIED	NO PRESERVATION METHOD USED		C1300	Rufino,M.S.M., Alves,R.E., de Brito,E.S., Pérez-Jiménez,J., Saura-Calixto,F., Mancini-Filho,J.	Food Chemistry	121	2010	Bioactive compounds and antioxidant capacities of 18 non-traditional tropical fruits from Brazil
52093	Acerola	Malpighia glabra L.	Extractable polyphenols (EPP)	1249830	µmole/kg DW	ABTS assay	Fruit or berry	WHOLE	Pulp was kept, and seed were discarded	FRUIT OR FRUIT PRODUCT	NOT HEAT-TREATED	RAW MATERIAL	NO TREATMENT APPLIED	NO PRESERVATION METHOD USED		C1309	Rufino,M., Pérez‐Jiménez, J., Tabernero,M., Ricardo,E.,De Brito,E., Saura‐Calixto,F.	International Journal of Food Science & Technology	45	2010	Acerola and cashew apple as sources of antioxidants and dietary fibre
52091	Acerola	Malpighia glabra L.	Extractable polyphenols (EPP)	1640290	µmole/kg DW	FRAP assay	Fruit or berry	WHOLE	Pulp was kept, and seed were discarded	FRUIT OR FRUIT PRODUCT	NOT HEAT-TREATED	RAW MATERIAL	NO TREATMENT APPLIED	NO PRESERVATION METHOD USED		C1309	Rufino,M., Pérez‐Jiménez, J., Tabernero,M., Ricardo,E.,De Brito,E., Saura‐Calixto,F.	International Journal of Food Science & Technology	45	2010	Acerola and cashew apple as sources of antioxidants and dietary fibre
51594	Acerola	Malpighia glabra L.	Extractable polyphenols (EPP)	1996000	µmole/kg DW	FRAP assay	Fruit or berry	WHOLE		FRUIT OR FRUIT PRODUCT	NOT HEAT-TREATED	RAW MATERIAL	NO TREATMENT APPLIED	NO PRESERVATION METHOD USED		C1300	Rufino,M.S.M., Alves,R.E., de Brito,E.S., Pérez-Jiménez,J., Saura-Calixto,F., Mancini-Filho,J.	Food Chemistry	121	2010	Bioactive compounds and antioxidant capacities of 18 non-traditional tropical fruits from Brazil
52095	Acerola	Malpighia glabra L.	Hydrolysable polyphenols (HPP)	14870	µmole/kg DW	FRAP assay	Fruit or berry	WHOLE	Pulp was kept, and seed were discarded	FRUIT OR FRUIT PRODUCT	NOT HEAT-TREATED	RAW MATERIAL	NO TREATMENT APPLIED	NO PRESERVATION METHOD USED		C1309	Rufino,M., Pérez‐Jiménez, J., Tabernero,M., Ricardo,E.,De Brito,E., Saura‐Calixto,F.	International Journal of Food Science & Technology	45	2010	Acerola and cashew apple as sources of antioxidants and dietary fibre
52096	Acerola	Malpighia glabra L.	Hydrolysable polyphenols (HPP)	173920	µmole/kg DW	ORAC assay	Fruit or berry	WHOLE	Pulp was kept, and seed were discarded	FRUIT OR FRUIT PRODUCT	NOT HEAT-TREATED	RAW MATERIAL	NO TREATMENT APPLIED	NO PRESERVATION METHOD USED		C1309	Rufino,M., Pérez‐Jiménez, J., Tabernero,M., Ricardo,E.,De Brito,E., Saura‐Calixto,F.	International Journal of Food Science & Technology	45	2010	Acerola and cashew apple as sources of antioxidants and dietary fibre
51917	Apple	Malus domestica Borkh.	Extractable proanthocyanidins (EPA)	384	mg/kg FW	High-performance liquid chromatography	Fruit or berry	WHOLE		FRUIT OR FRUIT PRODUCT	NOT HEAT-TREATED	RAW MATERIAL	NO TREATMENT APPLIED	NO PRESERVATION METHOD USED	The data documented in this paper is for extractable and non extractable procyanidins	C1305	Hellström,J.K., Mattila,P.H.	Journal of Agricultural and Food Chemistry	56	2008	HPLC Determination of Extractable and Unextractable Proanthocyanidins in Plant Materials
51923	Apple	Malus domestica Borkh.	Extractable proanthocyanidins (EPA)	720	mg/kg FW	High-performance liquid chromatography	Fruit or berry	WHOLE		FRUIT OR FRUIT PRODUCT	NOT HEAT-TREATED	RAW MATERIAL	NO TREATMENT APPLIED	NO PRESERVATION METHOD USED	The data documented in this paper is for extractable and non extractable procyanidins	C1305	Hellström,J.K., Mattila,P.H.	Journal of Agricultural and Food Chemistry	56	2008	HPLC Determination of Extractable and Unextractable Proanthocyanidins in Plant Materials
51919	Apple	Malus domestica Borkh.	Extractable proanthocyanidins (EPA)	911	mg/kg FW	High-performance liquid chromatography	Fruit or berry	WHOLE		FRUIT OR FRUIT PRODUCT	NOT HEAT-TREATED	RAW MATERIAL	NO TREATMENT APPLIED	NO PRESERVATION METHOD USED	The data documented in this paper is for extractable and non extractable procyanidins	C1305	Hellström,J.K., Mattila,P.H.	Journal of Agricultural and Food Chemistry	56	2008	HPLC Determination of Extractable and Unextractable Proanthocyanidins in Plant Materials
51921	Apple	Malus domestica Borkh.	Extractable proanthocyanidins (EPA)	1540	mg/kg FW	High-performance liquid chromatography	Fruit or berry	WHOLE		FRUIT OR FRUIT PRODUCT	NOT HEAT-TREATED	RAW MATERIAL	NO TREATMENT APPLIED	NO PRESERVATION METHOD USED	The data documented in this paper is for extractable and non extractable procyanidins	C1305	Hellström,J.K., Mattila,P.H.	Journal of Agricultural and Food Chemistry	56	2008	HPLC Determination of Extractable and Unextractable Proanthocyanidins in Plant Materials
51506	Apple	Malus domestica Borkh.	Extractable polyphenols (EPP)	149	mg/kg FW	High-performance liquid chromatography	Fruit or berry	WHOLE		FRUIT OR FRUIT PRODUCT	NOT HEAT-TREATED	RAW MATERIAL	NO TREATMENT APPLIED	NO PRESERVATION METHOD USED		C1295	Arranz,S., Saura-Calixto,F., Shaha,S., Kroon,P.A.	Journal of Agricultural and Food Chemistry	57	2009	High Contents of Nonextractable Polyphenols in Fruits Suggest That Polyphenol Contents of Plant Foods Have Been Underestimated
51907	Apple	Malus domestica Borkh.	Extractable polyphenols (EPP)	1080	mg/kg DW	Folin-Ciocalteu assay	Fruit or berry	WHOLE	Flesh and peel	FRUIT OR FRUIT PRODUCT	NOT HEAT-TREATED	RAW MATERIAL	NO TREATMENT APPLIED	NO PRESERVATION METHOD USED		C1304	Condezo-Hoyos,L., Mohanty,I.P., Noratto,G.D.,	Food Chemistry	161	2014	Assessing non-digestible compounds in apple cultivars and their potential as modulators of obese faecal microbiota in vitro
51905	Apple	Malus domestica Borkh.	Extractable polyphenols (EPP)	3930	mg/kg DW	Folin-Ciocalteu assay	Fruit or berry	WHOLE	Flesh and peel	FRUIT OR FRUIT PRODUCT	NOT HEAT-TREATED	RAW MATERIAL	NO TREATMENT APPLIED	NO PRESERVATION METHOD USED		C1304	Condezo-Hoyos,L., Mohanty,I.P., Noratto,G.D.,	Food Chemistry	161	2014	Assessing non-digestible compounds in apple cultivars and their potential as modulators of obese faecal microbiota in vitro
51902	Apple	Malus domestica Borkh.	Extractable polyphenols (EPP)	5780	mg/kg DW	Folin-Ciocalteu assay	Fruit or berry	WHOLE	Flesh and peel	FRUIT OR FRUIT PRODUCT	NOT HEAT-TREATED	RAW MATERIAL	NO TREATMENT APPLIED	NO PRESERVATION METHOD USED		C1304	Condezo-Hoyos,L., Mohanty,I.P., Noratto,G.D.,	Food Chemistry	161	2014	Assessing non-digestible compounds in apple cultivars and their potential as modulators of obese faecal microbiota in vitro
51901	Apple	Malus domestica Borkh.	Extractable polyphenols (EPP)	5910	mg/kg DW	Folin-Ciocalteu assay	Fruit or berry	WHOLE	Flesh and peel	FRUIT OR FRUIT PRODUCT	NOT HEAT-TREATED	RAW MATERIAL	NO TREATMENT APPLIED	NO PRESERVATION METHOD USED		C1304	Condezo-Hoyos,L., Mohanty,I.P., Noratto,G.D.,	Food Chemistry	161	2014	Assessing non-digestible compounds in apple cultivars and their potential as modulators of obese faecal microbiota in vitro
51327	Apple	Malus domestica Borkh.	Extractable polyphenols (EPP)	6091	mg/kg DW	Folin-Ciocalteu assay	Fruit or berry	WHOLE		FRUIT OR FRUIT PRODUCT	NOT HEAT-TREATED	RAW MATERIAL	NO TREATMENT APPLIED	NO PRESERVATION METHOD USED		C1290	Pérez-Jiménez,J., Saura-Calixto,F.	Food Research International	74	2015	Macromolecular antioxidants or non-extractable polyphenols in fruit and vegetables: Intake in four European countries
51906	Apple	Malus domestica Borkh.	Extractable polyphenols (EPP)	7230	mg/kg DW	Folin-Ciocalteu assay	Fruit or berry	WHOLE	Flesh and peel	FRUIT OR FRUIT PRODUCT	NOT HEAT-TREATED	RAW MATERIAL	NO TREATMENT APPLIED	NO PRESERVATION METHOD USED		C1304	Condezo-Hoyos,L., Mohanty,I.P., Noratto,G.D.,	Food Chemistry	161	2014	Assessing non-digestible compounds in apple cultivars and their potential as modulators of obese faecal microbiota in vitro
51903	Apple	Malus domestica Borkh.	Extractable polyphenols (EPP)	8040	mg/kg DW	Folin-Ciocalteu assay	Fruit or berry	WHOLE	Flesh and peel	FRUIT OR FRUIT PRODUCT	NOT HEAT-TREATED	RAW MATERIAL	NO TREATMENT APPLIED	NO PRESERVATION METHOD USED		C1304	Condezo-Hoyos,L., Mohanty,I.P., Noratto,G.D.,	Food Chemistry	161	2014	Assessing non-digestible compounds in apple cultivars and their potential as modulators of obese faecal microbiota in vitro
51904	Apple	Malus domestica Borkh.	Extractable polyphenols (EPP)	9180	mg/kg DW	Folin-Ciocalteu assay	Fruit or berry	WHOLE	Flesh and peel	FRUIT OR FRUIT PRODUCT	NOT HEAT-TREATED	RAW MATERIAL	NO TREATMENT APPLIED	NO PRESERVATION METHOD USED		C1304	Condezo-Hoyos,L., Mohanty,I.P., Noratto,G.D.,	Food Chemistry	161	2014	Assessing non-digestible compounds in apple cultivars and their potential as modulators of obese faecal microbiota in vitro
51438	Apple	Malus domestica Borkh.	Extractable polyphenols (EPP)	59200	µmole/kg DW	ORAC assay	Fruit or berry	WHOLE		FRUIT OR FRUIT PRODUCT	NOT HEAT-TREATED	RAW MATERIAL	NO TREATMENT APPLIED	NO PRESERVATION METHOD USED		C1290	Pérez-Jiménez,J., Saura-Calixto,F.	Food Research International	74	2015	Macromolecular antioxidants or non-extractable polyphenols in fruit and vegetables: Intake in four European countries
51510	Apple	Malus domestica Borkh.	Hydrolysable polyphenols (HPP)	803	mg/kg FW	High-performance liquid chromatography	Fruit or berry	WHOLE		FRUIT OR FRUIT PRODUCT	NOT HEAT-TREATED	RAW MATERIAL	NO TREATMENT APPLIED	NO PRESERVATION METHOD USED		C1295	Arranz,S., Saura-Calixto,F., Shaha,S., Kroon,P.A.	Journal of Agricultural and Food Chemistry	57	2009	High Contents of Nonextractable Polyphenols in Fruits Suggest That Polyphenol Contents of Plant Foods Have Been Underestimated
51399	Apple	Malus domestica Borkh.	Hydrolysable polyphenols (HPP)	10627	mg/kg DW	Folin-Ciocalteu assay	Fruit or berry	WHOLE		FRUIT OR FRUIT PRODUCT	NOT HEAT-TREATED	RAW MATERIAL	NO TREATMENT APPLIED	NO PRESERVATION METHOD USED		C1290	Pérez-Jiménez,J., Saura-Calixto,F.	Food Research International	74	2015	Macromolecular antioxidants or non-extractable polyphenols in fruit and vegetables: Intake in four European countries
51439	Apple	Malus domestica Borkh.	Hydrolysable polyphenols (HPP)	93900	µmole/kg DW	ORAC assay	Fruit or berry	WHOLE		FRUIT OR FRUIT PRODUCT	NOT HEAT-TREATED	RAW MATERIAL	NO TREATMENT APPLIED	NO PRESERVATION METHOD USED		C1290	Pérez-Jiménez,J., Saura-Calixto,F.	Food Research International	74	2015	Macromolecular antioxidants or non-extractable polyphenols in fruit and vegetables: Intake in four European countries
51927	Apple	Malus domestica Borkh.	Non-extractable proanthocyanidins (NEPA)	41	mg/kg FW	High-performance liquid chromatography	Fruit or berry	WHOLE		FRUIT OR FRUIT PRODUCT	NOT HEAT-TREATED	RAW MATERIAL	NO TREATMENT APPLIED	NO PRESERVATION METHOD USED	The data documented in this paper is for extractable and non extractable procyanidins	C1305	Hellström,J.K., Mattila,P.H.	Journal of Agricultural and Food Chemistry	56	2008	HPLC Determination of Extractable and Unextractable Proanthocyanidins in Plant Materials
51925	Apple	Malus domestica Borkh.	Non-extractable proanthocyanidins (NEPA)	49	mg/kg FW	High-performance liquid chromatography	Fruit or berry	WHOLE		FRUIT OR FRUIT PRODUCT	NOT HEAT-TREATED	RAW MATERIAL	NO TREATMENT APPLIED	NO PRESERVATION METHOD USED	The data documented in this paper is for extractable and non extractable procyanidins	C1305	Hellström,J.K., Mattila,P.H.	Journal of Agricultural and Food Chemistry	56	2008	HPLC Determination of Extractable and Unextractable Proanthocyanidins in Plant Materials
51931	Apple	Malus domestica Borkh.	Non-extractable proanthocyanidins (NEPA)	70	mg/kg FW	High-performance liquid chromatography	Fruit or berry	WHOLE		FRUIT OR FRUIT PRODUCT	NOT HEAT-TREATED	RAW MATERIAL	NO TREATMENT APPLIED	NO PRESERVATION METHOD USED	The data documented in this paper is for extractable and non extractable procyanidins	C1305	Hellström,J.K., Mattila,P.H.	Journal of Agricultural and Food Chemistry	56	2008	HPLC Determination of Extractable and Unextractable Proanthocyanidins in Plant Materials
51929	Apple	Malus domestica Borkh.	Non-extractable proanthocyanidins (NEPA)	74	mg/kg FW	High-performance liquid chromatography	Fruit or berry	WHOLE		FRUIT OR FRUIT PRODUCT	NOT HEAT-TREATED	RAW MATERIAL	NO TREATMENT APPLIED	NO PRESERVATION METHOD USED	The data documented in this paper is for extractable and non extractable procyanidins	C1305	Hellström,J.K., Mattila,P.H.	Journal of Agricultural and Food Chemistry	56	2008	HPLC Determination of Extractable and Unextractable Proanthocyanidins in Plant Materials
51513	Apple	Malus domestica Borkh.	Non-extractable proanthocyanidins (NEPA)	457.7	mg/kg FW	Spectrophotometry	Fruit or berry	WHOLE		FRUIT OR FRUIT PRODUCT	NOT HEAT-TREATED	RAW MATERIAL	NO TREATMENT APPLIED	NO PRESERVATION METHOD USED		C1295	Arranz,S., Saura-Calixto,F., Shaha,S., Kroon,P.A.	Journal of Agricultural and Food Chemistry	57	2009	High Contents of Nonextractable Polyphenols in Fruits Suggest That Polyphenol Contents of Plant Foods Have Been Underestimated
51400	Apple	Malus domestica Borkh.	Non-extractable proanthocyanidins (NEPA)	760	mg/kg DW	Spectrophotometry	Fruit or berry	WHOLE		FRUIT OR FRUIT PRODUCT	NOT HEAT-TREATED	RAW MATERIAL	NO TREATMENT APPLIED	NO PRESERVATION METHOD USED		C1290	Pérez-Jiménez,J., Saura-Calixto,F.	Food Research International	74	2015	Macromolecular antioxidants or non-extractable polyphenols in fruit and vegetables: Intake in four European countries
51913	Apple	Malus domestica Borkh.	Non-extractable proanthocyanidins (NEPA)	3280	mg/kg DW	Folin-Ciocalteu assay	Fruit or berry	WHOLE	Flesh and peel	FRUIT OR FRUIT PRODUCT	NOT HEAT-TREATED	RAW MATERIAL	NO TREATMENT APPLIED	NO PRESERVATION METHOD USED		C1304	Condezo-Hoyos,L., Mohanty,I.P., Noratto,G.D.,	Food Chemistry	161	2014	Assessing non-digestible compounds in apple cultivars and their potential as modulators of obese faecal microbiota in vitro
51916	Apple	Malus domestica Borkh.	Non-extractable proanthocyanidins (NEPA)	4150	mg/kg DW	Folin-Ciocalteu assay	Fruit or berry	WHOLE	Flesh and peel	FRUIT OR FRUIT PRODUCT	NOT HEAT-TREATED	RAW MATERIAL	NO TREATMENT APPLIED	NO PRESERVATION METHOD USED		C1304	Condezo-Hoyos,L., Mohanty,I.P., Noratto,G.D.,	Food Chemistry	161	2014	Assessing non-digestible compounds in apple cultivars and their potential as modulators of obese faecal microbiota in vitro
51912	Apple	Malus domestica Borkh.	Non-extractable proanthocyanidins (NEPA)	4470	mg/kg DW	Folin-Ciocalteu assay	Fruit or berry	WHOLE	Flesh and peel	FRUIT OR FRUIT PRODUCT	NOT HEAT-TREATED	RAW MATERIAL	NO TREATMENT APPLIED	NO PRESERVATION METHOD USED		C1304	Condezo-Hoyos,L., Mohanty,I.P., Noratto,G.D.,	Food Chemistry	161	2014	Assessing non-digestible compounds in apple cultivars and their potential as modulators of obese faecal microbiota in vitro
51910	Apple	Malus domestica Borkh.	Non-extractable proanthocyanidins (NEPA)	5230	mg/kg DW	Folin-Ciocalteu assay	Fruit or berry	WHOLE	Flesh and peel	FRUIT OR FRUIT PRODUCT	NOT HEAT-TREATED	RAW MATERIAL	NO TREATMENT APPLIED	NO PRESERVATION METHOD USED		C1304	Condezo-Hoyos,L., Mohanty,I.P., Noratto,G.D.,	Food Chemistry	161	2014	Assessing non-digestible compounds in apple cultivars and their potential as modulators of obese faecal microbiota in vitro
51911	Apple	Malus domestica Borkh.	Non-extractable proanthocyanidins (NEPA)	5300	mg/kg DW	Folin-Ciocalteu assay	Fruit or berry	WHOLE	Flesh and peel	FRUIT OR FRUIT PRODUCT	NOT HEAT-TREATED	RAW MATERIAL	NO TREATMENT APPLIED	NO PRESERVATION METHOD USED		C1304	Condezo-Hoyos,L., Mohanty,I.P., Noratto,G.D.,	Food Chemistry	161	2014	Assessing non-digestible compounds in apple cultivars and their potential as modulators of obese faecal microbiota in vitro
51915	Apple	Malus domestica Borkh.	Non-extractable proanthocyanidins (NEPA)	5650	mg/kg DW	Folin-Ciocalteu assay	Fruit or berry	WHOLE	Flesh and peel	FRUIT OR FRUIT PRODUCT	NOT HEAT-TREATED	RAW MATERIAL	NO TREATMENT APPLIED	NO PRESERVATION METHOD USED		C1304	Condezo-Hoyos,L., Mohanty,I.P., Noratto,G.D.,	Food Chemistry	161	2014	Assessing non-digestible compounds in apple cultivars and their potential as modulators of obese faecal microbiota in vitro
51914	Apple	Malus domestica Borkh.	Non-extractable proanthocyanidins (NEPA)	5700	mg/kg DW	Folin-Ciocalteu assay	Fruit or berry	WHOLE	Flesh and peel	FRUIT OR FRUIT PRODUCT	NOT HEAT-TREATED	RAW MATERIAL	NO TREATMENT APPLIED	NO PRESERVATION METHOD USED		C1304	Condezo-Hoyos,L., Mohanty,I.P., Noratto,G.D.,	Food Chemistry	161	2014	Assessing non-digestible compounds in apple cultivars and their potential as modulators of obese faecal microbiota in vitro
51918	Apple	Malus domestica Borkh.	Extractable proanthocyanidins (EPA)	736	mg/kg FW	High-performance liquid chromatography	Fruit or berry, peel only	WHOLE		FRUIT OR FRUIT PRODUCT	NOT HEAT-TREATED	RAW MATERIAL	NO TREATMENT APPLIED	NO PRESERVATION METHOD USED	The data documented in this paper is for extractable and non extractable procyanidins	C1305	Hellström,J.K., Mattila,P.H.	Journal of Agricultural and Food Chemistry	56	2008	HPLC Determination of Extractable and Unextractable Proanthocyanidins in Plant Materials
51920	Apple	Malus domestica Borkh.	Extractable proanthocyanidins (EPA)	1600	mg/kg FW	High-performance liquid chromatography	Fruit or berry, peel only	WHOLE		FRUIT OR FRUIT PRODUCT	NOT HEAT-TREATED	RAW MATERIAL	NO TREATMENT APPLIED	NO PRESERVATION METHOD USED	The data documented in this paper is for extractable and non extractable procyanidins	C1305	Hellström,J.K., Mattila,P.H.	Journal of Agricultural and Food Chemistry	56	2008	HPLC Determination of Extractable and Unextractable Proanthocyanidins in Plant Materials
51924	Apple	Malus domestica Borkh.	Extractable proanthocyanidins (EPA)	1640	mg/kg FW	High-performance liquid chromatography	Fruit or berry, peel only	WHOLE		FRUIT OR FRUIT PRODUCT	NOT HEAT-TREATED	RAW MATERIAL	NO TREATMENT APPLIED	NO PRESERVATION METHOD USED	The data documented in this paper is for extractable and non extractable procyanidins	C1305	Hellström,J.K., Mattila,P.H.	Journal of Agricultural and Food Chemistry	56	2008	HPLC Determination of Extractable and Unextractable Proanthocyanidins in Plant Materials
51922	Apple	Malus domestica Borkh.	Extractable proanthocyanidins (EPA)	2120	mg/kg FW	High-performance liquid chromatography	Fruit or berry, peel only	WHOLE		FRUIT OR FRUIT PRODUCT	NOT HEAT-TREATED	RAW MATERIAL	NO TREATMENT APPLIED	NO PRESERVATION METHOD USED	The data documented in this paper is for extractable and non extractable procyanidins	C1305	Hellström,J.K., Mattila,P.H.	Journal of Agricultural and Food Chemistry	56	2008	HPLC Determination of Extractable and Unextractable Proanthocyanidins in Plant Materials
51926	Apple	Malus domestica Borkh.	Non-extractable proanthocyanidins (NEPA)	133	mg/kg FW	High-performance liquid chromatography	Fruit or berry, peel only	WHOLE		FRUIT OR FRUIT PRODUCT	NOT HEAT-TREATED	RAW MATERIAL	NO TREATMENT APPLIED	NO PRESERVATION METHOD USED	The data documented in this paper is for extractable and non extractable procyanidins	C1305	Hellström,J.K., Mattila,P.H.	Journal of Agricultural and Food Chemistry	56	2008	HPLC Determination of Extractable and Unextractable Proanthocyanidins in Plant Materials
51930	Apple	Malus domestica Borkh.	Non-extractable proanthocyanidins (NEPA)	147	mg/kg FW	High-performance liquid chromatography	Fruit or berry, peel only	WHOLE		FRUIT OR FRUIT PRODUCT	NOT HEAT-TREATED	RAW MATERIAL	NO TREATMENT APPLIED	NO PRESERVATION METHOD USED	The data documented in this paper is for extractable and non extractable procyanidins	C1305	Hellström,J.K., Mattila,P.H.	Journal of Agricultural and Food Chemistry	56	2008	HPLC Determination of Extractable and Unextractable Proanthocyanidins in Plant Materials
51928	Apple	Malus domestica Borkh.	Non-extractable proanthocyanidins (NEPA)	215	mg/kg FW	High-performance liquid chromatography	Fruit or berry, peel only	WHOLE		FRUIT OR FRUIT PRODUCT	NOT HEAT-TREATED	RAW MATERIAL	NO TREATMENT APPLIED	NO PRESERVATION METHOD USED	The data documented in this paper is for extractable and non extractable procyanidins	C1305	Hellström,J.K., Mattila,P.H.	Journal of Agricultural and Food Chemistry	56	2008	HPLC Determination of Extractable and Unextractable Proanthocyanidins in Plant Materials
51932	Apple	Malus domestica Borkh.	Non-extractable proanthocyanidins (NEPA)	371	mg/kg FW	High-performance liquid chromatography	Fruit or berry, peel only	WHOLE		FRUIT OR FRUIT PRODUCT	NOT HEAT-TREATED	RAW MATERIAL	NO TREATMENT APPLIED	NO PRESERVATION METHOD USED	The data documented in this paper is for extractable and non extractable procyanidins	C1305	Hellström,J.K., Mattila,P.H.	Journal of Agricultural and Food Chemistry	56	2008	HPLC Determination of Extractable and Unextractable Proanthocyanidins in Plant Materials
52117	Apple	Malus domestica Borkh.	Non-extractable proanthocyanidins (NEPA)	550	mg/kg FW	High-performance liquid chromatography	Fruit or berry, peel present	WHOLE	Raw	FRUIT OR FRUIT PRODUCT	NOT HEAT-TREATED	RAW MATERIAL	NO TREATMENT APPLIED	NO PRESERVATION METHOD USED		C1316	Zurita,J.,Diaz-Rubio,M.E.,Saura-Calixto,F.	international Journal of Food Sciences and Nutrition	63	2012	Improved procedure to determine non-extractable polymeric proanthocyanidins in plant foods
51563	Apple	Malus domestica Borkh.	Non-extractable proanthocyanidins (NEPA)	790	mg/kg DW	Spectrophotometry	Fruit or berry, peel present	WHOLE		FRUIT OR FRUIT PRODUCT	NOT HEAT-TREATED	RAW MATERIAL	NO TREATMENT APPLIED	NO PRESERVATION METHOD USED		C1297	Pérez-Jiménez,J., Arranz,S., Saura-Calixto,F.	Food Research International	42	2009	Proanthocyanidin content in foods is largely underestimated in the literature data: An approach to quantification of the missing proanthocyanidins
51564	Apple	Malus domestica Borkh.	Non-extractable proanthocyanidins (NEPA)	3830	mg/kg DW	Spectrophotometry	Fruit or berry, peel present	WHOLE		FRUIT OR FRUIT PRODUCT	NOT HEAT-TREATED	RAW MATERIAL	NO TREATMENT APPLIED	NO PRESERVATION METHOD USED		C1297	Pérez-Jiménez,J., Arranz,S., Saura-Calixto,F.	Food Research International	42	2009	Proanthocyanidin content in foods is largely underestimated in the literature data: An approach to quantification of the missing proanthocyanidins
51352	Asparagus	Asparagus officinalis L.	Extractable polyphenols (EPP)	9385	mg/kg DW	Folin-Ciocalteu assay	Spear or shoot	WHOLE		VEGETABLE (EXCLUDING POTATO)	NOT HEAT-TREATED	RAW MATERIAL	NO TREATMENT APPLIED	NO PRESERVATION METHOD USED		C1290	Pérez-Jiménez,J., Saura-Calixto,F.	Food Research International	74	2015	Macromolecular antioxidants or non-extractable polyphenols in fruit and vegetables: Intake in four European countries
51407	Asparagus	Asparagus officinalis L.	Extractable polyphenols (EPP)	29300	µmole/kg DW	ORAC assay	Spear or shoot	WHOLE		VEGETABLE (EXCLUDING POTATO)	NOT HEAT-TREATED	RAW MATERIAL	NO TREATMENT APPLIED	NO PRESERVATION METHOD USED		C1290	Pérez-Jiménez,J., Saura-Calixto,F.	Food Research International	74	2015	Macromolecular antioxidants or non-extractable polyphenols in fruit and vegetables: Intake in four European countries
51376	Asparagus	Asparagus officinalis L.	Hydrolysable polyphenols (HPP)	10627	mg/kg DW	Folin-Ciocalteu assay	Spear or shoot	WHOLE		VEGETABLE (EXCLUDING POTATO)	NOT HEAT-TREATED	RAW MATERIAL	NO TREATMENT APPLIED	NO PRESERVATION METHOD USED		C1290	Pérez-Jiménez,J., Saura-Calixto,F.	Food Research International	74	2015	Macromolecular antioxidants or non-extractable polyphenols in fruit and vegetables: Intake in four European countries
51428	Asparagus	Asparagus officinalis L.	Hydrolysable polyphenols (HPP)	14500	µmole/kg DW	ORAC assay	Spear or shoot	WHOLE		VEGETABLE (EXCLUDING POTATO)	NOT HEAT-TREATED	RAW MATERIAL	NO TREATMENT APPLIED	NO PRESERVATION METHOD USED		C1290	Pérez-Jiménez,J., Saura-Calixto,F.	Food Research International	74	2015	Macromolecular antioxidants or non-extractable polyphenols in fruit and vegetables: Intake in four European countries
52114	Aubergine, eggplant	Solanum melongena L.	Extractable polyphenols (EPP)	639.9	mg/kg FW	Folin-Ciocalteu assay	Fruit or berry	WHOLE	Fresh	VEGETABLE (EXCLUDING POTATO)	NOT HEAT-TREATED	RAW MATERIAL	NO TREATMENT APPLIED	NO PRESERVATION METHOD USED		C1315	Zambrano,E.,Chavez-Jauregui,R.,Plaza,M.,Wessel-Beaver,L.	Food Science and Technology	2015	2015	Phenolic content and antioxidant capacity in organically and conventionally grown eggplant (Solanum melongena) fruits following thermal processing
52113	Aubergine, eggplant	Solanum melongena L.	Extractable polyphenols (EPP)	772	mg/kg FW	Folin-Ciocalteu assay	Fruit or berry	WHOLE	Fresh	VEGETABLE (EXCLUDING POTATO)	NOT HEAT-TREATED	RAW MATERIAL	NO TREATMENT APPLIED	NO PRESERVATION METHOD USED		C1315	Zambrano,E.,Chavez-Jauregui,R.,Plaza,M.,Wessel-Beaver,L.	Food Science and Technology	2015	2015	Phenolic content and antioxidant capacity in organically and conventionally grown eggplant (Solanum melongena) fruits following thermal processing
52108	Aubergine, eggplant	Solanum melongena L.	Extractable polyphenols (EPP)	36610	µmole/kg FW	ORAC assay	Fruit or berry	WHOLE	Fresh	VEGETABLE (EXCLUDING POTATO)	NOT HEAT-TREATED	RAW MATERIAL	NO TREATMENT APPLIED	NO PRESERVATION METHOD USED		C1315	Zambrano,E.,Chavez-Jauregui,R.,Plaza,M.,Wessel-Beaver,L.	Food Science and Technology	2015	2015	Phenolic content and antioxidant capacity in organically and conventionally grown eggplant (Solanum melongena) fruits following thermal processing
52110	Aubergine, eggplant	Solanum melongena L.	Extractable polyphenols (EPP)	48060	µmole/kg FW	DPPH assay	Fruit or berry	WHOLE	Fresh	VEGETABLE (EXCLUDING POTATO)	NOT HEAT-TREATED	RAW MATERIAL	NO TREATMENT APPLIED	NO PRESERVATION METHOD USED		C1315	Zambrano,E.,Chavez-Jauregui,R.,Plaza,M.,Wessel-Beaver,L.	Food Science and Technology	2015	2015	Phenolic content and antioxidant capacity in organically and conventionally grown eggplant (Solanum melongena) fruits following thermal processing
52105	Aubergine, eggplant	Solanum melongena L.	Extractable polyphenols (EPP)	50600	µmole/kg FW	ORAC assay	Fruit or berry	WHOLE	Fresh	VEGETABLE (EXCLUDING POTATO)	NOT HEAT-TREATED	RAW MATERIAL	NO TREATMENT APPLIED	NO PRESERVATION METHOD USED		C1315	Zambrano,E.,Chavez-Jauregui,R.,Plaza,M.,Wessel-Beaver,L.	Food Science and Technology	2015	2015	Phenolic content and antioxidant capacity in organically and conventionally grown eggplant (Solanum melongena) fruits following thermal processing
52109	Aubergine, eggplant	Solanum melongena L.	Extractable polyphenols (EPP)	62410	µmole/kg FW	DPPH assay	Fruit or berry	WHOLE	Fresh	VEGETABLE (EXCLUDING POTATO)	NOT HEAT-TREATED	RAW MATERIAL	NO TREATMENT APPLIED	NO PRESERVATION METHOD USED		C1315	Zambrano,E.,Chavez-Jauregui,R.,Plaza,M.,Wessel-Beaver,L.	Food Science and Technology	2015	2015	Phenolic content and antioxidant capacity in organically and conventionally grown eggplant (Solanum melongena) fruits following thermal processing
52107	Aubergine, eggplant	Solanum melongena L.	Hydrolysable polyphenols (HPP)	719.5	mg/kg FW	Folin-Ciocalteu assay	Fruit or berry	WHOLE	Fresh	VEGETABLE (EXCLUDING POTATO)	NOT HEAT-TREATED	RAW MATERIAL	NO TREATMENT APPLIED	NO PRESERVATION METHOD USED		C1315	Zambrano,E.,Chavez-Jauregui,R.,Plaza,M.,Wessel-Beaver,L.	Food Science and Technology	2015	2015	Phenolic content and antioxidant capacity in organically and conventionally grown eggplant (Solanum melongena) fruits following thermal processing
52116	Aubergine, eggplant	Solanum melongena L.	Hydrolysable polyphenols (HPP)	1000	mg/kg FW	Folin-Ciocalteu assay	Fruit or berry	WHOLE	Fresh	VEGETABLE (EXCLUDING POTATO)	NOT HEAT-TREATED	RAW MATERIAL	NO TREATMENT APPLIED	NO PRESERVATION METHOD USED		C1315	Zambrano,E.,Chavez-Jauregui,R.,Plaza,M.,Wessel-Beaver,L.	Food Science and Technology	2015	2015	Phenolic content and antioxidant capacity in organically and conventionally grown eggplant (Solanum melongena) fruits following thermal processing
52115	Aubergine, eggplant	Solanum melongena L.	Hydrolysable polyphenols (HPP)	47710	µmole/kg FW	ORAC assay	Fruit or berry	WHOLE	Fresh	VEGETABLE (EXCLUDING POTATO)	NOT HEAT-TREATED	RAW MATERIAL	NO TREATMENT APPLIED	NO PRESERVATION METHOD USED		C1315	Zambrano,E.,Chavez-Jauregui,R.,Plaza,M.,Wessel-Beaver,L.	Food Science and Technology	2015	2015	Phenolic content and antioxidant capacity in organically and conventionally grown eggplant (Solanum melongena) fruits following thermal processing
52111	Aubergine, eggplant	Solanum melongena L.	Hydrolysable polyphenols (HPP)	62110	µmole/kg FW	DPPH assay	Fruit or berry	WHOLE	Fresh	VEGETABLE (EXCLUDING POTATO)	NOT HEAT-TREATED	RAW MATERIAL	NO TREATMENT APPLIED	NO PRESERVATION METHOD USED		C1315	Zambrano,E.,Chavez-Jauregui,R.,Plaza,M.,Wessel-Beaver,L.	Food Science and Technology	2015	2015	Phenolic content and antioxidant capacity in organically and conventionally grown eggplant (Solanum melongena) fruits following thermal processing
52112	Aubergine, eggplant	Solanum melongena L.	Hydrolysable polyphenols (HPP)	67380	µmole/kg FW	DPPH assay	Fruit or berry	WHOLE	Fresh	VEGETABLE (EXCLUDING POTATO)	NOT HEAT-TREATED	RAW MATERIAL	NO TREATMENT APPLIED	NO PRESERVATION METHOD USED		C1315	Zambrano,E.,Chavez-Jauregui,R.,Plaza,M.,Wessel-Beaver,L.	Food Science and Technology	2015	2015	Phenolic content and antioxidant capacity in organically and conventionally grown eggplant (Solanum melongena) fruits following thermal processing
52106	Aubergine, eggplant	Solanum melongena L.	Hydrolysable polyphenols (HPP)	75060	µmole/kg FW	ORAC assay	Fruit or berry	WHOLE	Fresh	VEGETABLE (EXCLUDING POTATO)	NOT HEAT-TREATED	RAW MATERIAL	NO TREATMENT APPLIED	NO PRESERVATION METHOD USED		C1315	Zambrano,E.,Chavez-Jauregui,R.,Plaza,M.,Wessel-Beaver,L.	Food Science and Technology	2015	2015	Phenolic content and antioxidant capacity in organically and conventionally grown eggplant (Solanum melongena) fruits following thermal processing
51583	Avocado	Persea americana Mill.	Non-extractable proanthocyanidins (NEPA)	47	mg/kg FW	High-performance liquid chromatography	Fruit or berry	WHOLE		FRUIT OR FRUIT PRODUCT	NOT HEAT-TREATED	RAW MATERIAL	NO TREATMENT APPLIED	NO PRESERVATION METHOD USED		C1298	Hellström,J.K., Törrönen,A.R., Mattila,P.H.	Journal of Agricultural and Food Chemistry	57	2009	Proanthocyanidins in Common Food Products of Plant Origin
51353	Banana	Musa × paradisiaca L.	Extractable polyphenols (EPP)	2973	mg/kg DW	Folin-Ciocalteu assay	Fruit or berry	WHOLE		FRUIT OR FRUIT PRODUCT	NOT HEAT-TREATED	RAW MATERIAL	NO TREATMENT APPLIED	NO PRESERVATION METHOD USED		C1290	Pérez-Jiménez,J., Saura-Calixto,F.	Food Research International	74	2015	Macromolecular antioxidants or non-extractable polyphenols in fruit and vegetables: Intake in four European countries
51406	Banana	Musa × paradisiaca L.	Extractable polyphenols (EPP)	49200	µmole/kg DW	ORAC assay	Fruit or berry	WHOLE		FRUIT OR FRUIT PRODUCT	NOT HEAT-TREATED	RAW MATERIAL	NO TREATMENT APPLIED	NO PRESERVATION METHOD USED		C1290	Pérez-Jiménez,J., Saura-Calixto,F.	Food Research International	74	2015	Macromolecular antioxidants or non-extractable polyphenols in fruit and vegetables: Intake in four European countries
51377	Banana	Musa × paradisiaca L.	Hydrolysable polyphenols (HPP)	14151	mg/kg DW	Folin-Ciocalteu assay	Fruit or berry	WHOLE		FRUIT OR FRUIT PRODUCT	NOT HEAT-TREATED	RAW MATERIAL	NO TREATMENT APPLIED	NO PRESERVATION METHOD USED		C1290	Pérez-Jiménez,J., Saura-Calixto,F.	Food Research International	74	2015	Macromolecular antioxidants or non-extractable polyphenols in fruit and vegetables: Intake in four European countries
51430	Banana	Musa × paradisiaca L.	Hydrolysable polyphenols (HPP)	38200	µmole/kg DW	ORAC assay	Fruit or berry	WHOLE		FRUIT OR FRUIT PRODUCT	NOT HEAT-TREATED	RAW MATERIAL	NO TREATMENT APPLIED	NO PRESERVATION METHOD USED		C1290	Pérez-Jiménez,J., Saura-Calixto,F.	Food Research International	74	2015	Macromolecular antioxidants or non-extractable polyphenols in fruit and vegetables: Intake in four European countries
51584	Banana	Musa × paradisiaca L.	Non-extractable proanthocyanidins (NEPA)	643	mg/kg FW	High-performance liquid chromatography	Fruit or berry	WHOLE		FRUIT OR FRUIT PRODUCT	NOT HEAT-TREATED	RAW MATERIAL	NO TREATMENT APPLIED	NO PRESERVATION METHOD USED		C1298	Hellström,J.K., Törrönen,A.R., Mattila,P.H.	Journal of Agricultural and Food Chemistry	57	2009	Proanthocyanidins in Common Food Products of Plant Origin
51565	Banana	Musa × paradisiaca L.	Non-extractable proanthocyanidins (NEPA)	9800	mg/kg DW	Spectrophotometry	Fruit or berry	WHOLE		FRUIT OR FRUIT PRODUCT	NOT HEAT-TREATED	RAW MATERIAL	NO TREATMENT APPLIED	NO PRESERVATION METHOD USED		C1297	Pérez-Jiménez,J., Arranz,S., Saura-Calixto,F.	Food Research International	42	2009	Proanthocyanidin content in foods is largely underestimated in the literature data: An approach to quantification of the missing proanthocyanidins
52118	Banana	Musa × paradisiaca L.	Non-extractable proanthocyanidins (NEPA)	17510	mg/kg FW	High-performance liquid chromatography	Fruit or berry	WHOLE	Raw	FRUIT OR FRUIT PRODUCT	NOT HEAT-TREATED	RAW MATERIAL	NO TREATMENT APPLIED	NO PRESERVATION METHOD USED		C1316	Zurita,J.,Diaz-Rubio,M.E.,Saura-Calixto,F.	international Journal of Food Sciences and Nutrition	63	2012	Improved procedure to determine non-extractable polymeric proanthocyanidins in plant foods
51401	Banana	Musa × paradisiaca L.	Non-extractable proanthocyanidins (NEPA)	18683	mg/kg DW	Spectrophotometry	Fruit or berry	WHOLE		FRUIT OR FRUIT PRODUCT	NOT HEAT-TREATED	RAW MATERIAL	NO TREATMENT APPLIED	NO PRESERVATION METHOD USED		C1290	Pérez-Jiménez,J., Saura-Calixto,F.	Food Research International	74	2015	Macromolecular antioxidants or non-extractable polyphenols in fruit and vegetables: Intake in four European countries
51362	Bean, mung	Vigna radiata (L.) R.Wilczek var. radiata	Extractable polyphenols (EPP)	2934	mg/kg DW	Folin-Ciocalteu assay	Pod containing small, immature seed	WHOLE	green bean	PULSE OR PULSE PRODUCT	NOT HEAT-TREATED	RAW MATERIAL	NO TREATMENT APPLIED	NO PRESERVATION METHOD USED		C1290	Pérez-Jiménez,J., Saura-Calixto,F.	Food Research International	74	2015	Macromolecular antioxidants or non-extractable polyphenols in fruit and vegetables: Intake in four European countries
51419	Bean, mung	Vigna radiata (L.) R.Wilczek var. radiata	Extractable polyphenols (EPP)	13400	µmole/kg DW	ORAC assay	Pod containing small, immature seed	WHOLE	green bean	PULSE OR PULSE PRODUCT	NOT HEAT-TREATED	RAW MATERIAL	NO TREATMENT APPLIED	NO PRESERVATION METHOD USED		C1290	Pérez-Jiménez,J., Saura-Calixto,F.	Food Research International	74	2015	Macromolecular antioxidants or non-extractable polyphenols in fruit and vegetables: Intake in four European countries
51444	Bean, mung	Vigna radiata (L.) R.Wilczek var. radiata	Hydrolysable polyphenols (HPP)	29300	µmole/kg DW	ORAC assay	Pod containing small, immature seed	WHOLE	green bean	PULSE OR PULSE PRODUCT	NOT HEAT-TREATED	RAW MATERIAL	NO TREATMENT APPLIED	NO PRESERVATION METHOD USED		C1290	Pérez-Jiménez,J., Saura-Calixto,F.	Food Research International	74	2015	Macromolecular antioxidants or non-extractable polyphenols in fruit and vegetables: Intake in four European countries
51372	Beetroot	Beta vulgaris var. vulgaris	Extractable polyphenols (EPP)	2943	mg/kg DW	Folin-Ciocalteu assay	Root	WHOLE		VEGETABLE (EXCLUDING POTATO)	NOT HEAT-TREATED	RAW MATERIAL	NO TREATMENT APPLIED	NO PRESERVATION METHOD USED		C1290	Pérez-Jiménez,J., Saura-Calixto,F.	Food Research International	74	2015	Macromolecular antioxidants or non-extractable polyphenols in fruit and vegetables: Intake in four European countries
51423	Beetroot	Beta vulgaris var. vulgaris	Extractable polyphenols (EPP)	13900	µmole/kg DW	ORAC assay	Root	WHOLE		VEGETABLE (EXCLUDING POTATO)	NOT HEAT-TREATED	RAW MATERIAL	NO TREATMENT APPLIED	NO PRESERVATION METHOD USED		C1290	Pérez-Jiménez,J., Saura-Calixto,F.	Food Research International	74	2015	Macromolecular antioxidants or non-extractable polyphenols in fruit and vegetables: Intake in four European countries
51395	Beetroot	Beta vulgaris var. vulgaris	Hydrolysable polyphenols (HPP)	6092	mg/kg DW	Folin-Ciocalteu assay	Root	WHOLE		VEGETABLE (EXCLUDING POTATO)	NOT HEAT-TREATED	RAW MATERIAL	NO TREATMENT APPLIED	NO PRESERVATION METHOD USED		C1290	Pérez-Jiménez,J., Saura-Calixto,F.	Food Research International	74	2015	Macromolecular antioxidants or non-extractable polyphenols in fruit and vegetables: Intake in four European countries
51450	Beetroot	Beta vulgaris var. vulgaris	Hydrolysable polyphenols (HPP)	44900	µmole/kg DW	ORAC assay	Root	WHOLE		VEGETABLE (EXCLUDING POTATO)	NOT HEAT-TREATED	RAW MATERIAL	NO TREATMENT APPLIED	NO PRESERVATION METHOD USED		C1290	Pérez-Jiménez,J., Saura-Calixto,F.	Food Research International	74	2015	Macromolecular antioxidants or non-extractable polyphenols in fruit and vegetables: Intake in four European countries
51575	Bilberry	Vaccinium myrtillus L.	Non-extractable proanthocyanidins (NEPA)	540	mg/kg FW	High-performance liquid chromatography	Fruit or berry	WHOLE		FRUIT OR FRUIT PRODUCT	NOT HEAT-TREATED	RAW MATERIAL	NO TREATMENT APPLIED	NO PRESERVATION METHOD USED		C1298	Hellström,J.K., Törrönen,A.R., Mattila,P.H.	Journal of Agricultural and Food Chemistry	57	2009	Proanthocyanidins in Common Food Products of Plant Origin
51577	Bilberry, bog	Vaccinium uliginosum L.	Non-extractable proanthocyanidins (NEPA)	244	mg/kg FW	High-performance liquid chromatography	Fruit or berry	WHOLE	in paper fruit name is bog wortleberry	FRUIT OR FRUIT PRODUCT	NOT HEAT-TREATED	RAW MATERIAL	NO TREATMENT APPLIED	NO PRESERVATION METHOD USED		C1298	Hellström,J.K., Törrönen,A.R., Mattila,P.H.	Journal of Agricultural and Food Chemistry	57	2009	Proanthocyanidins in Common Food Products of Plant Origin
51579	Blackcurrant	Ribes nigrum L.	Non-extractable proanthocyanidins (NEPA)	2020	mg/kg FW	High-performance liquid chromatography	Fruit or berry	WHOLE		FRUIT OR FRUIT PRODUCT	NOT HEAT-TREATED	RAW MATERIAL	NO TREATMENT APPLIED	NO PRESERVATION METHOD USED		C1298	Hellström,J.K., Törrönen,A.R., Mattila,P.H.	Journal of Agricultural and Food Chemistry	57	2009	Proanthocyanidins in Common Food Products of Plant Origin
51574	Blueberry	Vaccinium corymbosum L.	Non-extractable proanthocyanidins (NEPA)	464	mg/kg FW	High-performance liquid chromatography	Fruit or berry	WHOLE		FRUIT OR FRUIT PRODUCT	NOT HEAT-TREATED	RAW MATERIAL	NO TREATMENT APPLIED	NO PRESERVATION METHOD USED		C1298	Hellström,J.K., Törrönen,A.R., Mattila,P.H.	Journal of Agricultural and Food Chemistry	57	2009	Proanthocyanidins in Common Food Products of Plant Origin
51354	Broccoli	Brassica oleracea L. convar. botrytis (L.) Alef. var. italica Plenck	Extractable polyphenols (EPP)	9171	mg/kg DW	Folin-Ciocalteu assay	Floret or flower	WHOLE		VEGETABLE (EXCLUDING POTATO)	NOT HEAT-TREATED	RAW MATERIAL	NO TREATMENT APPLIED	NO PRESERVATION METHOD USED		C1290	Pérez-Jiménez,J., Saura-Calixto,F.	Food Research International	74	2015	Macromolecular antioxidants or non-extractable polyphenols in fruit and vegetables: Intake in four European countries
51405	Broccoli	Brassica oleracea L. convar. botrytis (L.) Alef. var. italica Plenck	Extractable polyphenols (EPP)	52100	µmole/kg DW	ORAC assay	Floret or flower	WHOLE		VEGETABLE (EXCLUDING POTATO)	NOT HEAT-TREATED	RAW MATERIAL	NO TREATMENT APPLIED	NO PRESERVATION METHOD USED		C1290	Pérez-Jiménez,J., Saura-Calixto,F.	Food Research International	74	2015	Macromolecular antioxidants or non-extractable polyphenols in fruit and vegetables: Intake in four European countries
51378	Broccoli	Brassica oleracea L. convar. botrytis (L.) Alef. var. italica Plenck	Hydrolysable polyphenols (HPP)	11261	mg/kg DW	Folin-Ciocalteu assay	Floret or flower	WHOLE		VEGETABLE (EXCLUDING POTATO)	NOT HEAT-TREATED	RAW MATERIAL	NO TREATMENT APPLIED	NO PRESERVATION METHOD USED		C1290	Pérez-Jiménez,J., Saura-Calixto,F.	Food Research International	74	2015	Macromolecular antioxidants or non-extractable polyphenols in fruit and vegetables: Intake in four European countries
51429	Broccoli	Brassica oleracea L. convar. botrytis (L.) Alef. var. italica Plenck	Hydrolysable polyphenols (HPP)	50000	µmole/kg DW	ORAC assay	Floret or flower	WHOLE		VEGETABLE (EXCLUDING POTATO)	NOT HEAT-TREATED	RAW MATERIAL	NO TREATMENT APPLIED	NO PRESERVATION METHOD USED		C1290	Pérez-Jiménez,J., Saura-Calixto,F.	Food Research International	74	2015	Macromolecular antioxidants or non-extractable polyphenols in fruit and vegetables: Intake in four European countries
51355	Brussels sprouts	Brassica oleracea L. convar. gemmifera (DC.) Gladis var. gemmifera DC.	Extractable polyphenols (EPP)	8568	mg/kg DW	Folin-Ciocalteu assay	Bud	WHOLE		VEGETABLE (EXCLUDING POTATO)	NOT HEAT-TREATED	RAW MATERIAL	NO TREATMENT APPLIED	NO PRESERVATION METHOD USED		C1290	Pérez-Jiménez,J., Saura-Calixto,F.	Food Research International	74	2015	Macromolecular antioxidants or non-extractable polyphenols in fruit and vegetables: Intake in four European countries
51410	Brussels sprouts	Brassica oleracea L. convar. gemmifera (DC.) Gladis var. gemmifera DC.	Extractable polyphenols (EPP)	11300	µmole/kg DW	ORAC assay	Bud	WHOLE		VEGETABLE (EXCLUDING POTATO)	NOT HEAT-TREATED	RAW MATERIAL	NO TREATMENT APPLIED	NO PRESERVATION METHOD USED		C1290	Pérez-Jiménez,J., Saura-Calixto,F.	Food Research International	74	2015	Macromolecular antioxidants or non-extractable polyphenols in fruit and vegetables: Intake in four European countries
51382	Brussels sprouts	Brassica oleracea L. convar. gemmifera (DC.) Gladis var. gemmifera DC.	Hydrolysable polyphenols (HPP)	7220	mg/kg DW	Folin-Ciocalteu assay	Bud	WHOLE		VEGETABLE (EXCLUDING POTATO)	NOT HEAT-TREATED	RAW MATERIAL	NO TREATMENT APPLIED	NO PRESERVATION METHOD USED		C1290	Pérez-Jiménez,J., Saura-Calixto,F.	Food Research International	74	2015	Macromolecular antioxidants or non-extractable polyphenols in fruit and vegetables: Intake in four European countries
51434	Brussels sprouts	Brassica oleracea L. convar. gemmifera (DC.) Gladis var. gemmifera DC.	Hydrolysable polyphenols (HPP)	93500	µmole/kg DW	ORAC assay	Bud	WHOLE		VEGETABLE (EXCLUDING POTATO)	NOT HEAT-TREATED	RAW MATERIAL	NO TREATMENT APPLIED	NO PRESERVATION METHOD USED		C1290	Pérez-Jiménez,J., Saura-Calixto,F.	Food Research International	74	2015	Macromolecular antioxidants or non-extractable polyphenols in fruit and vegetables: Intake in four European countries
51375	Cabbage, white	Brassica oleracea L. convar. capitata (L.) Alef. var. capitata L.	Extractable polyphenols (EPP)	4280	mg/kg DW	Folin-Ciocalteu assay	Head (plant)	WHOLE		VEGETABLE (EXCLUDING POTATO)	NOT HEAT-TREATED	RAW MATERIAL	NO TREATMENT APPLIED	NO PRESERVATION METHOD USED		C1290	Pérez-Jiménez,J., Saura-Calixto,F.	Food Research International	74	2015	Macromolecular antioxidants or non-extractable polyphenols in fruit and vegetables: Intake in four European countries
51426	Cabbage, white	Brassica oleracea L. convar. capitata (L.) Alef. var. capitata L.	Extractable polyphenols (EPP)	10600	µmole/kg DW	ORAC assay	Head (plant)	WHOLE		VEGETABLE (EXCLUDING POTATO)	NOT HEAT-TREATED	RAW MATERIAL	NO TREATMENT APPLIED	NO PRESERVATION METHOD USED		C1290	Pérez-Jiménez,J., Saura-Calixto,F.	Food Research International	74	2015	Macromolecular antioxidants or non-extractable polyphenols in fruit and vegetables: Intake in four European countries
51398	Cabbage, white	Brassica oleracea L. convar. capitata (L.) Alef. var. capitata L.	Hydrolysable polyphenols (HPP)	5228	mg/kg DW	Folin-Ciocalteu assay	Head (plant)	WHOLE		VEGETABLE (EXCLUDING POTATO)	NOT HEAT-TREATED	RAW MATERIAL	NO TREATMENT APPLIED	NO PRESERVATION METHOD USED		C1290	Pérez-Jiménez,J., Saura-Calixto,F.	Food Research International	74	2015	Macromolecular antioxidants or non-extractable polyphenols in fruit and vegetables: Intake in four European countries
51452	Cabbage, white	Brassica oleracea L. convar. capitata (L.) Alef. var. capitata L.	Hydrolysable polyphenols (HPP)	5700	µmole/kg DW	ORAC assay	Head (plant)	WHOLE		VEGETABLE (EXCLUDING POTATO)	NOT HEAT-TREATED	RAW MATERIAL	NO TREATMENT APPLIED	NO PRESERVATION METHOD USED		C1290	Pérez-Jiménez,J., Saura-Calixto,F.	Food Research International	74	2015	Macromolecular antioxidants or non-extractable polyphenols in fruit and vegetables: Intake in four European countries
52347	Cacao	Theobroma cacao L.	Extractable polyphenols (EPP)	10050	mg/kg FW	Folin-Ciocalteu assay	Seed or kernel	WHOLE	Cola cao, commercial cocoa soluble powder	CHOCOLATE OR CHOCOLATE PRODUCT	Not specified	COOKING METHOD NOT KNOWN	TREATMENT APPLIED NOT KNOWN	PRESERVATION METHOD NOT KNOWN		C1328	Tabernero,M., Serrano,J. and Saura-Calixto,F.	International Journal of Food Science & Technology	41	2006	The antioxidant capacity of cocoa products: contribution to the Spanish diet
52353	Cacao	Theobroma cacao L.	Extractable polyphenols (EPP)	12040	mg/kg FW	Folin-Ciocalteu assay	Seed or kernel	WHOLE	Nesquik, commercial cocoa soluble powder	CHOCOLATE OR CHOCOLATE PRODUCT	Not specified	COOKING METHOD NOT KNOWN	TREATMENT APPLIED NOT KNOWN	PRESERVATION METHOD NOT KNOWN		C1328	Tabernero,M., Serrano,J. and Saura-Calixto,F.	International Journal of Food Science & Technology	41	2006	The antioxidant capacity of cocoa products: contribution to the Spanish diet
52341	Cacao	Theobroma cacao L.	Extractable polyphenols (EPP)	13100	mg/kg FW	Folin-Ciocalteu assay	Seed or kernel	WHOLE	Milk chocolate with 34% of cocoa content	CHOCOLATE OR CHOCOLATE PRODUCT	Not specified	COOKING METHOD NOT KNOWN	TREATMENT APPLIED NOT KNOWN	PRESERVATION METHOD NOT KNOWN		C1328	Tabernero,M., Serrano,J. and Saura-Calixto,F.	International Journal of Food Science & Technology	41	2006	The antioxidant capacity of cocoa products: contribution to the Spanish diet
52335	Cacao	Theobroma cacao L.	Extractable polyphenols (EPP)	18160	mg/kg FW	Folin-Ciocalteu assay	Seed or kernel	WHOLE	Dark chocolate with 52% of cocoa content	CHOCOLATE OR CHOCOLATE PRODUCT	Not specified	COOKING METHOD NOT KNOWN	TREATMENT APPLIED NOT KNOWN	PRESERVATION METHOD NOT KNOWN		C1328	Tabernero,M., Serrano,J. and Saura-Calixto,F.	International Journal of Food Science & Technology	41	2006	The antioxidant capacity of cocoa products: contribution to the Spanish diet
52349	Cacao	Theobroma cacao L.	Extractable polyphenols (EPP)	42370	µmole/kg FW	ABTS assay	Seed or kernel	WHOLE	Cola cao, commercial cocoa soluble powder	CHOCOLATE OR CHOCOLATE PRODUCT	Not specified	COOKING METHOD NOT KNOWN	TREATMENT APPLIED NOT KNOWN	PRESERVATION METHOD NOT KNOWN		C1328	Tabernero,M., Serrano,J. and Saura-Calixto,F.	International Journal of Food Science & Technology	41	2006	The antioxidant capacity of cocoa products: contribution to the Spanish diet
52343	Cacao	Theobroma cacao L.	Extractable polyphenols (EPP)	42720	µmole/kg FW	ABTS assay	Seed or kernel	WHOLE	Milk chocolate with 34% of cocoa content	CHOCOLATE OR CHOCOLATE PRODUCT	Not specified	COOKING METHOD NOT KNOWN	TREATMENT APPLIED NOT KNOWN	PRESERVATION METHOD NOT KNOWN		C1328	Tabernero,M., Serrano,J. and Saura-Calixto,F.	International Journal of Food Science & Technology	41	2006	The antioxidant capacity of cocoa products: contribution to the Spanish diet
52355	Cacao	Theobroma cacao L.	Extractable polyphenols (EPP)	54740	µmole/kg FW	ABTS assay	Seed or kernel	WHOLE	Nesquik, commercial cocoa soluble powder	CHOCOLATE OR CHOCOLATE PRODUCT	Not specified	COOKING METHOD NOT KNOWN	TREATMENT APPLIED NOT KNOWN	PRESERVATION METHOD NOT KNOWN		C1328	Tabernero,M., Serrano,J. and Saura-Calixto,F.	International Journal of Food Science & Technology	41	2006	The antioxidant capacity of cocoa products: contribution to the Spanish diet
52342	Cacao	Theobroma cacao L.	Extractable polyphenols (EPP)	61500	µmole/kg FW	FRAP assay	Seed or kernel	WHOLE	Milk chocolate with 34% of cocoa content	CHOCOLATE OR CHOCOLATE PRODUCT	Not specified	COOKING METHOD NOT KNOWN	TREATMENT APPLIED NOT KNOWN	PRESERVATION METHOD NOT KNOWN		C1328	Tabernero,M., Serrano,J. and Saura-Calixto,F.	International Journal of Food Science & Technology	41	2006	The antioxidant capacity of cocoa products: contribution to the Spanish diet
52348	Cacao	Theobroma cacao L.	Extractable polyphenols (EPP)	71830	µmole/kg FW	FRAP assay	Seed or kernel	WHOLE	Cola cao, commercial cocoa soluble powder	CHOCOLATE OR CHOCOLATE PRODUCT	Not specified	COOKING METHOD NOT KNOWN	TREATMENT APPLIED NOT KNOWN	PRESERVATION METHOD NOT KNOWN		C1328	Tabernero,M., Serrano,J. and Saura-Calixto,F.	International Journal of Food Science & Technology	41	2006	The antioxidant capacity of cocoa products: contribution to the Spanish diet
52359	Cacao	Theobroma cacao L.	Extractable polyphenols (EPP)	77590	mg/kg FW	Folin-Ciocalteu assay	Seed or kernel	WHOLE	Cocoa paste used in both chocolates (dark and milk)	CHOCOLATE OR CHOCOLATE PRODUCT	Not specified	COOKING METHOD NOT KNOWN	TREATMENT APPLIED NOT KNOWN	PRESERVATION METHOD NOT KNOWN		C1328	Tabernero,M., Serrano,J. and Saura-Calixto,F.	International Journal of Food Science & Technology	41	2006	The antioxidant capacity of cocoa products: contribution to the Spanish diet
52337	Cacao	Theobroma cacao L.	Extractable polyphenols (EPP)	78800	µmole/kg FW	ABTS assay	Seed or kernel	WHOLE	Dark chocolate with 52% of cocoa content	CHOCOLATE OR CHOCOLATE PRODUCT	Not specified	COOKING METHOD NOT KNOWN	TREATMENT APPLIED NOT KNOWN	PRESERVATION METHOD NOT KNOWN		C1328	Tabernero,M., Serrano,J. and Saura-Calixto,F.	International Journal of Food Science & Technology	41	2006	The antioxidant capacity of cocoa products: contribution to the Spanish diet
52354	Cacao	Theobroma cacao L.	Extractable polyphenols (EPP)	84460	µmole/kg FW	FRAP assay	Seed or kernel	WHOLE	Nesquik, commercial cocoa soluble powder	CHOCOLATE OR CHOCOLATE PRODUCT	Not specified	COOKING METHOD NOT KNOWN	TREATMENT APPLIED NOT KNOWN	PRESERVATION METHOD NOT KNOWN		C1328	Tabernero,M., Serrano,J. and Saura-Calixto,F.	International Journal of Food Science & Technology	41	2006	The antioxidant capacity of cocoa products: contribution to the Spanish diet
52336	Cacao	Theobroma cacao L.	Extractable polyphenols (EPP)	149870	µmole/kg FW	FRAP assay	Seed or kernel	WHOLE	Dark chocolate with 52% of cocoa content	CHOCOLATE OR CHOCOLATE PRODUCT	Not specified	COOKING METHOD NOT KNOWN	TREATMENT APPLIED NOT KNOWN	PRESERVATION METHOD NOT KNOWN		C1328	Tabernero,M., Serrano,J. and Saura-Calixto,F.	International Journal of Food Science & Technology	41	2006	The antioxidant capacity of cocoa products: contribution to the Spanish diet
52361	Cacao	Theobroma cacao L.	Extractable polyphenols (EPP)	290290	µmole/kg FW	ABTS assay	Seed or kernel	WHOLE	Cocoa paste used in both chocolates (dark and milk)	CHOCOLATE OR CHOCOLATE PRODUCT	Not specified	COOKING METHOD NOT KNOWN	TREATMENT APPLIED NOT KNOWN	PRESERVATION METHOD NOT KNOWN		C1328	Tabernero,M., Serrano,J. and Saura-Calixto,F.	International Journal of Food Science & Technology	41	2006	The antioxidant capacity of cocoa products: contribution to the Spanish diet
52360	Cacao	Theobroma cacao L.	Extractable polyphenols (EPP)	606140	µmole/kg FW	FRAP assay	Seed or kernel	WHOLE	Cocoa paste used in both chocolates (dark and milk)	CHOCOLATE OR CHOCOLATE PRODUCT	Not specified	COOKING METHOD NOT KNOWN	TREATMENT APPLIED NOT KNOWN	PRESERVATION METHOD NOT KNOWN		C1328	Tabernero,M., Serrano,J. and Saura-Calixto,F.	International Journal of Food Science & Technology	41	2006	The antioxidant capacity of cocoa products: contribution to the Spanish diet
52352	Cacao	Theobroma cacao L.	Non-extractable proanthocyanidins (NEPA)	11200	mg/kg FW	Spectrophotometry	Seed or kernel	WHOLE	Cola cao, commercial cocoa soluble powder	CHOCOLATE OR CHOCOLATE PRODUCT	Not specified	COOKING METHOD NOT KNOWN	TREATMENT APPLIED NOT KNOWN	PRESERVATION METHOD NOT KNOWN		C1328	Tabernero,M., Serrano,J. and Saura-Calixto,F.	International Journal of Food Science & Technology	41	2006	The antioxidant capacity of cocoa products: contribution to the Spanish diet
52346	Cacao	Theobroma cacao L.	Non-extractable proanthocyanidins (NEPA)	11610	mg/kg FW	Spectrophotometry	Seed or kernel	WHOLE	Milk chocolate with 34% of cocoa content	CHOCOLATE OR CHOCOLATE PRODUCT	Not specified	COOKING METHOD NOT KNOWN	TREATMENT APPLIED NOT KNOWN	PRESERVATION METHOD NOT KNOWN		C1328	Tabernero,M., Serrano,J. and Saura-Calixto,F.	International Journal of Food Science & Technology	41	2006	The antioxidant capacity of cocoa products: contribution to the Spanish diet
52358	Cacao	Theobroma cacao L.	Non-extractable proanthocyanidins (NEPA)	13000	mg/kg FW	Spectrophotometry	Seed or kernel	WHOLE	Nesquik, commercial cocoa soluble powder	CHOCOLATE OR CHOCOLATE PRODUCT	Not specified	COOKING METHOD NOT KNOWN	TREATMENT APPLIED NOT KNOWN	PRESERVATION METHOD NOT KNOWN		C1328	Tabernero,M., Serrano,J. and Saura-Calixto,F.	International Journal of Food Science & Technology	41	2006	The antioxidant capacity of cocoa products: contribution to the Spanish diet
52350	Cacao	Theobroma cacao L.	Non-extractable proanthocyanidins (NEPA)	22260	µmole/kg FW	ABTS assay	Seed or kernel	WHOLE	Cola cao, commercial cocoa soluble powder	CHOCOLATE OR CHOCOLATE PRODUCT	Not specified	COOKING METHOD NOT KNOWN	TREATMENT APPLIED NOT KNOWN	PRESERVATION METHOD NOT KNOWN		C1328	Tabernero,M., Serrano,J. and Saura-Calixto,F.	International Journal of Food Science & Technology	41	2006	The antioxidant capacity of cocoa products: contribution to the Spanish diet
52356	Cacao	Theobroma cacao L.	Non-extractable proanthocyanidins (NEPA)	25880	µmole/kg FW	ABTS assay	Seed or kernel	WHOLE	Nesquik, commercial cocoa soluble powder	CHOCOLATE OR CHOCOLATE PRODUCT	Not specified	COOKING METHOD NOT KNOWN	TREATMENT APPLIED NOT KNOWN	PRESERVATION METHOD NOT KNOWN		C1328	Tabernero,M., Serrano,J. and Saura-Calixto,F.	International Journal of Food Science & Technology	41	2006	The antioxidant capacity of cocoa products: contribution to the Spanish diet
52344	Cacao	Theobroma cacao L.	Non-extractable proanthocyanidins (NEPA)	27120	µmole/kg FW	ABTS assay	Seed or kernel	WHOLE	Milk chocolate with 34% of cocoa content	CHOCOLATE OR CHOCOLATE PRODUCT	Not specified	COOKING METHOD NOT KNOWN	TREATMENT APPLIED NOT KNOWN	PRESERVATION METHOD NOT KNOWN		C1328	Tabernero,M., Serrano,J. and Saura-Calixto,F.	International Journal of Food Science & Technology	41	2006	The antioxidant capacity of cocoa products: contribution to the Spanish diet
52340	Cacao	Theobroma cacao L.	Non-extractable proanthocyanidins (NEPA)	29400	mg/kg FW	Spectrophotometry	Seed or kernel	WHOLE	Dark chocolate with 52% of cocoa content	CHOCOLATE OR CHOCOLATE PRODUCT	Not specified	COOKING METHOD NOT KNOWN	TREATMENT APPLIED NOT KNOWN	PRESERVATION METHOD NOT KNOWN		C1328	Tabernero,M., Serrano,J. and Saura-Calixto,F.	International Journal of Food Science & Technology	41	2006	The antioxidant capacity of cocoa products: contribution to the Spanish diet
52351	Cacao	Theobroma cacao L.	Non-extractable proanthocyanidins (NEPA)	51830	µmole/kg FW	FRAP assay	Seed or kernel	WHOLE	Cola cao, commercial cocoa soluble powder	CHOCOLATE OR CHOCOLATE PRODUCT	Not specified	COOKING METHOD NOT KNOWN	TREATMENT APPLIED NOT KNOWN	PRESERVATION METHOD NOT KNOWN		C1328	Tabernero,M., Serrano,J. and Saura-Calixto,F.	International Journal of Food Science & Technology	41	2006	The antioxidant capacity of cocoa products: contribution to the Spanish diet
52338	Cacao	Theobroma cacao L.	Non-extractable proanthocyanidins (NEPA)	60020	µmole/kg FW	ABTS assay	Seed or kernel	WHOLE	Dark chocolate with 52% of cocoa content	CHOCOLATE OR CHOCOLATE PRODUCT	Not specified	COOKING METHOD NOT KNOWN	TREATMENT APPLIED NOT KNOWN	PRESERVATION METHOD NOT KNOWN		C1328	Tabernero,M., Serrano,J. and Saura-Calixto,F.	International Journal of Food Science & Technology	41	2006	The antioxidant capacity of cocoa products: contribution to the Spanish diet
52357	Cacao	Theobroma cacao L.	Non-extractable proanthocyanidins (NEPA)	60150	µmole/kg FW	FRAP assay	Seed or kernel	WHOLE	Nesquik, commercial cocoa soluble powder	CHOCOLATE OR CHOCOLATE PRODUCT	Not specified	COOKING METHOD NOT KNOWN	TREATMENT APPLIED NOT KNOWN	PRESERVATION METHOD NOT KNOWN		C1328	Tabernero,M., Serrano,J. and Saura-Calixto,F.	International Journal of Food Science & Technology	41	2006	The antioxidant capacity of cocoa products: contribution to the Spanish diet
52345	Cacao	Theobroma cacao L.	Non-extractable proanthocyanidins (NEPA)	84310	µmole/kg FW	FRAP assay	Seed or kernel	WHOLE	Milk chocolate with 34% of cocoa content	CHOCOLATE OR CHOCOLATE PRODUCT	Not specified	COOKING METHOD NOT KNOWN	TREATMENT APPLIED NOT KNOWN	PRESERVATION METHOD NOT KNOWN		C1328	Tabernero,M., Serrano,J. and Saura-Calixto,F.	International Journal of Food Science & Technology	41	2006	The antioxidant capacity of cocoa products: contribution to the Spanish diet
52364	Cacao	Theobroma cacao L.	Non-extractable proanthocyanidins (NEPA)	111440	mg/kg FW	Spectrophotometry	Seed or kernel	WHOLE	Cocoa paste used in both chocolates (dark and milk)	CHOCOLATE OR CHOCOLATE PRODUCT	Not specified	COOKING METHOD NOT KNOWN	TREATMENT APPLIED NOT KNOWN	PRESERVATION METHOD NOT KNOWN		C1328	Tabernero,M., Serrano,J. and Saura-Calixto,F.	International Journal of Food Science & Technology	41	2006	The antioxidant capacity of cocoa products: contribution to the Spanish diet
52339	Cacao	Theobroma cacao L.	Non-extractable proanthocyanidins (NEPA)	144050	µmole/kg FW	FRAP assay	Seed or kernel	WHOLE	Dark chocolate with 52% of cocoa content	CHOCOLATE OR CHOCOLATE PRODUCT	Not specified	COOKING METHOD NOT KNOWN	TREATMENT APPLIED NOT KNOWN	PRESERVATION METHOD NOT KNOWN		C1328	Tabernero,M., Serrano,J. and Saura-Calixto,F.	International Journal of Food Science & Technology	41	2006	The antioxidant capacity of cocoa products: contribution to the Spanish diet
52362	Cacao	Theobroma cacao L.	Non-extractable proanthocyanidins (NEPA)	246140	µmole/kg FW	ABTS assay	Seed or kernel	WHOLE	Cocoa paste used in both chocolates (dark and milk)	CHOCOLATE OR CHOCOLATE PRODUCT	Not specified	COOKING METHOD NOT KNOWN	TREATMENT APPLIED NOT KNOWN	PRESERVATION METHOD NOT KNOWN		C1328	Tabernero,M., Serrano,J. and Saura-Calixto,F.	International Journal of Food Science & Technology	41	2006	The antioxidant capacity of cocoa products: contribution to the Spanish diet
52363	Cacao	Theobroma cacao L.	Non-extractable proanthocyanidins (NEPA)	695640	µmole/kg FW	FRAP assay	Seed or kernel	WHOLE	Cocoa paste used in both chocolates (dark and milk)	CHOCOLATE OR CHOCOLATE PRODUCT	Not specified	COOKING METHOD NOT KNOWN	TREATMENT APPLIED NOT KNOWN	PRESERVATION METHOD NOT KNOWN		C1328	Tabernero,M., Serrano,J. and Saura-Calixto,F.	International Journal of Food Science & Technology	41	2006	The antioxidant capacity of cocoa products: contribution to the Spanish diet
51356	Carrot	Daucus carota L. ssp. sativa (Hoffm.) Schübl. & Mart.	Extractable polyphenols (EPP)	1718	mg/kg DW	Folin-Ciocalteu assay	Root	WHOLE		VEGETABLE (EXCLUDING POTATO)	NOT HEAT-TREATED	RAW MATERIAL	NO TREATMENT APPLIED	NO PRESERVATION METHOD USED		C1290	Pérez-Jiménez,J., Saura-Calixto,F.	Food Research International	74	2015	Macromolecular antioxidants or non-extractable polyphenols in fruit and vegetables: Intake in four European countries
51414	Carrot	Daucus carota L. ssp. sativa (Hoffm.) Schübl. & Mart.	Extractable polyphenols (EPP)	4600	µmole/kg DW	ORAC assay	Root	WHOLE		VEGETABLE (EXCLUDING POTATO)	NOT HEAT-TREATED	RAW MATERIAL	NO TREATMENT APPLIED	NO PRESERVATION METHOD USED		C1290	Pérez-Jiménez,J., Saura-Calixto,F.	Food Research International	74	2015	Macromolecular antioxidants or non-extractable polyphenols in fruit and vegetables: Intake in four European countries
51386	Carrot	Daucus carota L. ssp. sativa (Hoffm.) Schübl. & Mart.	Hydrolysable polyphenols (HPP)	4112	mg/kg DW	Folin-Ciocalteu assay	Root	WHOLE		VEGETABLE (EXCLUDING POTATO)	NOT HEAT-TREATED	RAW MATERIAL	NO TREATMENT APPLIED	NO PRESERVATION METHOD USED		C1290	Pérez-Jiménez,J., Saura-Calixto,F.	Food Research International	74	2015	Macromolecular antioxidants or non-extractable polyphenols in fruit and vegetables: Intake in four European countries
51440	Carrot	Daucus carota L. ssp. sativa (Hoffm.) Schübl. & Mart.	Hydrolysable polyphenols (HPP)	14000	µmole/kg DW	ORAC assay	Root	WHOLE		VEGETABLE (EXCLUDING POTATO)	NOT HEAT-TREATED	RAW MATERIAL	NO TREATMENT APPLIED	NO PRESERVATION METHOD USED		C1290	Pérez-Jiménez,J., Saura-Calixto,F.	Food Research International	74	2015	Macromolecular antioxidants or non-extractable polyphenols in fruit and vegetables: Intake in four European countries
51601	Cashew	Anacardium occidentale L.	Extractable polyphenols (EPP)	8300	mg/kg DW	Folin-Ciocalteu assay	Fruit or berry	WHOLE	cashew apple	NUT, SEED OR KERNEL	NOT HEAT-TREATED	RAW MATERIAL	NO TREATMENT APPLIED	NO PRESERVATION METHOD USED		C1300	Rufino,M.S.M., Alves,R.E., de Brito,E.S., Pérez-Jiménez,J., Saura-Calixto,F., Mancini-Filho,J.	Food Chemistry	121	2010	Bioactive compounds and antioxidant capacities of 18 non-traditional tropical fruits from Brazil
51602	Cashew	Anacardium occidentale L.	Extractable polyphenols (EPP)	79400	µmole/kg DW	ABTS assay	Fruit or berry	WHOLE	cashew apple	NUT, SEED OR KERNEL	NOT HEAT-TREATED	RAW MATERIAL	NO TREATMENT APPLIED	NO PRESERVATION METHOD USED		C1300	Rufino,M.S.M., Alves,R.E., de Brito,E.S., Pérez-Jiménez,J., Saura-Calixto,F., Mancini-Filho,J.	Food Chemistry	121	2010	Bioactive compounds and antioxidant capacities of 18 non-traditional tropical fruits from Brazil
51603	Cashew	Anacardium occidentale L.	Extractable polyphenols (EPP)	154000	µmole/kg DW	FRAP assay	Fruit or berry	WHOLE	cashew apple	NUT, SEED OR KERNEL	NOT HEAT-TREATED	RAW MATERIAL	NO TREATMENT APPLIED	NO PRESERVATION METHOD USED		C1300	Rufino,M.S.M., Alves,R.E., de Brito,E.S., Pérez-Jiménez,J., Saura-Calixto,F., Mancini-Filho,J.	Food Chemistry	121	2010	Bioactive compounds and antioxidant capacities of 18 non-traditional tropical fruits from Brazil
52100	Cashew	Anacardium occidentale L.	Extractable polyphenols (EPP)	188160	µmole/kg DW	ABTS assay	Fruit or berry	WHOLE	Cashew apple Pulp was kept, and seed were discarded	NUT, SEED OR KERNEL	NOT HEAT-TREATED	RAW MATERIAL	NO TREATMENT APPLIED	NO PRESERVATION METHOD USED		C1309	Rufino,M., Pérez‐Jiménez, J., Tabernero,M., Ricardo,E.,De Brito,E., Saura‐Calixto,F.	International Journal of Food Science & Technology	45	2010	Acerola and cashew apple as sources of antioxidants and dietary fibre
52098	Cashew	Anacardium occidentale L.	Extractable polyphenols (EPP)	245440	µmole/kg DW	FRAP assay	Fruit or berry	WHOLE	Cashew apple Pulp was kept, and seed were discarded	NUT, SEED OR KERNEL	NOT HEAT-TREATED	RAW MATERIAL	NO TREATMENT APPLIED	NO PRESERVATION METHOD USED		C1309	Rufino,M., Pérez‐Jiménez, J., Tabernero,M., Ricardo,E.,De Brito,E., Saura‐Calixto,F.	International Journal of Food Science & Technology	45	2010	Acerola and cashew apple as sources of antioxidants and dietary fibre
52099	Cashew	Anacardium occidentale L.	Extractable polyphenols (EPP)	287310	µmole/kg DW	ORAC assay	Fruit or berry	WHOLE	Cashew apple Pulp was kept, and seed were discarded	NUT, SEED OR KERNEL	NOT HEAT-TREATED	RAW MATERIAL	NO TREATMENT APPLIED	NO PRESERVATION METHOD USED		C1309	Rufino,M., Pérez‐Jiménez, J., Tabernero,M., Ricardo,E.,De Brito,E., Saura‐Calixto,F.	International Journal of Food Science & Technology	45	2010	Acerola and cashew apple as sources of antioxidants and dietary fibre
52102	Cashew	Anacardium occidentale L.	Hydrolysable polyphenols (HPP)	56370	µmole/kg DW	FRAP assay	Fruit or berry	WHOLE	Cashew apple Pulp was kept, and seed were discarded	NUT, SEED OR KERNEL	NOT HEAT-TREATED	RAW MATERIAL	NO TREATMENT APPLIED	NO PRESERVATION METHOD USED		C1309	Rufino,M., Pérez‐Jiménez, J., Tabernero,M., Ricardo,E.,De Brito,E., Saura‐Calixto,F.	International Journal of Food Science & Technology	45	2010	Acerola and cashew apple as sources of antioxidants and dietary fibre
52103	Cashew	Anacardium occidentale L.	Hydrolysable polyphenols (HPP)	344650	µmole/kg DW	ORAC assay	Fruit or berry	WHOLE	Cashew apple Pulp was kept, and seed were discarded	NUT, SEED OR KERNEL	NOT HEAT-TREATED	RAW MATERIAL	NO TREATMENT APPLIED	NO PRESERVATION METHOD USED		C1309	Rufino,M., Pérez‐Jiménez, J., Tabernero,M., Ricardo,E.,De Brito,E., Saura‐Calixto,F.	International Journal of Food Science & Technology	45	2010	Acerola and cashew apple as sources of antioxidants and dietary fibre
51357	Chard	Beta vulgaris L. ssp. vulgaris convar. cicla (L.) Alef.	Extractable polyphenols (EPP)	3445	mg/kg DW	Folin-Ciocalteu assay	Leaf	WHOLE		VEGETABLE (EXCLUDING POTATO)	NOT HEAT-TREATED	RAW MATERIAL	NO TREATMENT APPLIED	NO PRESERVATION METHOD USED		C1290	Pérez-Jiménez,J., Saura-Calixto,F.	Food Research International	74	2015	Macromolecular antioxidants or non-extractable polyphenols in fruit and vegetables: Intake in four European countries
51409	Chard	Beta vulgaris L. ssp. vulgaris convar. cicla (L.) Alef.	Extractable polyphenols (EPP)	87600	µmole/kg DW	ORAC assay	Leaf	WHOLE		VEGETABLE (EXCLUDING POTATO)	NOT HEAT-TREATED	RAW MATERIAL	NO TREATMENT APPLIED	NO PRESERVATION METHOD USED		C1290	Pérez-Jiménez,J., Saura-Calixto,F.	Food Research International	74	2015	Macromolecular antioxidants or non-extractable polyphenols in fruit and vegetables: Intake in four European countries
51381	Chard	Beta vulgaris L. ssp. vulgaris convar. cicla (L.) Alef.	Hydrolysable polyphenols (HPP)	11973	mg/kg DW	Folin-Ciocalteu assay	Leaf	WHOLE		VEGETABLE (EXCLUDING POTATO)	NOT HEAT-TREATED	RAW MATERIAL	NO TREATMENT APPLIED	NO PRESERVATION METHOD USED		C1290	Pérez-Jiménez,J., Saura-Calixto,F.	Food Research International	74	2015	Macromolecular antioxidants or non-extractable polyphenols in fruit and vegetables: Intake in four European countries
51433	Chard	Beta vulgaris L. ssp. vulgaris convar. cicla (L.) Alef.	Hydrolysable polyphenols (HPP)	46400	µmole/kg DW	ORAC assay	Leaf	WHOLE		VEGETABLE (EXCLUDING POTATO)	NOT HEAT-TREATED	RAW MATERIAL	NO TREATMENT APPLIED	NO PRESERVATION METHOD USED		C1290	Pérez-Jiménez,J., Saura-Calixto,F.	Food Research International	74	2015	Macromolecular antioxidants or non-extractable polyphenols in fruit and vegetables: Intake in four European countries
51648	Cherry	Prunus avium (L.) L. ssp. avium	Non-extractable proanthocyanidins (NEPA)	22	mg/kg FW	High-performance liquid chromatography	Fruit or berry	WHOLE		FRUIT OR FRUIT PRODUCT	NOT HEAT-TREATED	RAW MATERIAL	NO TREATMENT APPLIED	NO PRESERVATION METHOD USED		C1298	Hellström,J.K., Törrönen,A.R., Mattila,P.H.	Journal of Agricultural and Food Chemistry	57	2009	Proanthocyanidins in Common Food Products of Plant Origin
51566	Cherry	Prunus avium (L.) L. ssp. avium	Non-extractable proanthocyanidins (NEPA)	320	mg/kg DW	Spectrophotometry	Fruit or berry	WHOLE		FRUIT OR FRUIT PRODUCT	NOT HEAT-TREATED	RAW MATERIAL	NO TREATMENT APPLIED	NO PRESERVATION METHOD USED		C1297	Pérez-Jiménez,J., Arranz,S., Saura-Calixto,F.	Food Research International	42	2009	Proanthocyanidin content in foods is largely underestimated in the literature data: An approach to quantification of the missing proanthocyanidins
51344	Chestnut	Castanea sativaMill.	Extractable polyphenols (EPP)	3658	mg/kg DW	Folin-Ciocalteu assay	Seed or kernel	FINELY GROUND	Commercial sweet chestnut flour	NUT, SEED OR KERNEL	NOT HEAT-TREATED	RAW MATERIAL	TREATMENT APPLIED NOT KNOWN	PRESERVATION METHOD NOT KNOWN		C1285	Durazzo,A., Turfani,V., Azzini,E., Maiani,G., Carcea,M.	Food Chemistry	140	2013	Phenols, lignans and antioxidant properties of legume and sweet chestnut flours
51345	Chestnut	Castanea sativaMill.	Extractable polyphenols (EPP)	55650	µmole/kg DW	FRAP assay	Seed or kernel	FINELY GROUND	Commercial sweet chestnut flour	NUT, SEED OR KERNEL	NOT HEAT-TREATED	RAW MATERIAL	TREATMENT APPLIED NOT KNOWN	PRESERVATION METHOD NOT KNOWN		C1285	Durazzo,A., Turfani,V., Azzini,E., Maiani,G., Carcea,M.	Food Chemistry	140	2013	Phenols, lignans and antioxidant properties of legume and sweet chestnut flours
51347	Chestnut	Castanea sativaMill.	Hydrolysable polyphenols (HPP)	8960.1	mg/kg DW	Folin-Ciocalteu assay	Seed or kernel	FINELY GROUND	Commercial sweet chestnut flour	NUT, SEED OR KERNEL	NOT HEAT-TREATED	RAW MATERIAL	TREATMENT APPLIED NOT KNOWN	PRESERVATION METHOD NOT KNOWN		C1285	Durazzo,A., Turfani,V., Azzini,E., Maiani,G., Carcea,M.	Food Chemistry	140	2013	Phenols, lignans and antioxidant properties of legume and sweet chestnut flours
51346	Chestnut	Castanea sativaMill.	Hydrolysable polyphenols (HPP)	66490	µmole/kg DW	FRAP assay	Seed or kernel	FINELY GROUND	Commercial sweet chestnut flour	NUT, SEED OR KERNEL	NOT HEAT-TREATED	RAW MATERIAL	TREATMENT APPLIED NOT KNOWN	PRESERVATION METHOD NOT KNOWN		C1285	Durazzo,A., Turfani,V., Azzini,E., Maiani,G., Carcea,M.	Food Chemistry	140	2013	Phenols, lignans and antioxidant properties of legume and sweet chestnut flours
51330	Chickpea	Cicer arietinum L. ssp. arietinum	Extractable polyphenols (EPP)	1498.7	mg/kg DW	Folin-Ciocalteu assay	Seed or kernel	FINELY GROUND	Commercial chickpea flour	FLOUR OR STARCH	NOT HEAT-TREATED	RAW MATERIAL	TREATMENT APPLIED NOT KNOWN	PRESERVATION METHOD NOT KNOWN		C1285	Durazzo,A., Turfani,V., Azzini,E., Maiani,G., Carcea,M.	Food Chemistry	140	2013	Phenols, lignans and antioxidant properties of legume and sweet chestnut flours
51332	Chickpea	Cicer arietinum L. ssp. arietinum	Extractable polyphenols (EPP)	3730	µmole/kg DW	FRAP assay	Seed or kernel	FINELY GROUND	Commercial Chickpea flour	PULSE OR PULSE PRODUCT	NOT HEAT-TREATED	RAW MATERIAL	TREATMENT APPLIED NOT KNOWN	PRESERVATION METHOD NOT KNOWN		C1285	Durazzo,A., Turfani,V., Azzini,E., Maiani,G., Carcea,M.	Food Chemistry	140	2013	Phenols, lignans and antioxidant properties of legume and sweet chestnut flours
51334	Chickpea	Cicer arietinum L. ssp. arietinum	Hydrolysable polyphenols (HPP)	15000.7	mg/kg DW	Folin-Ciocalteu assay	Seed or kernel	FINELY GROUND		PULSE OR PULSE PRODUCT	NOT HEAT-TREATED	RAW MATERIAL	TREATMENT APPLIED NOT KNOWN	PRESERVATION METHOD NOT KNOWN		C1285	Durazzo,A., Turfani,V., Azzini,E., Maiani,G., Carcea,M.	Food Chemistry	140	2013	Phenols, lignans and antioxidant properties of legume and sweet chestnut flours
51335	Chickpea	Cicer arietinum L. ssp. arietinum	Hydrolysable polyphenols (HPP)	40320	µmole/kg DW	FRAP assay	Seed or kernel	FINELY GROUND		PULSE OR PULSE PRODUCT	NOT HEAT-TREATED	RAW MATERIAL	TREATMENT APPLIED NOT KNOWN	PRESERVATION METHOD NOT KNOWN		C1285	Durazzo,A., Turfani,V., Azzini,E., Maiani,G., Carcea,M.	Food Chemistry	140	2013	Phenols, lignans and antioxidant properties of legume and sweet chestnut flours
51365	Chicory	Cichorium intybus L. ssp. intybus Foliosum Group	Extractable polyphenols (EPP)	3255	mg/kg DW	Folin-Ciocalteu assay	Leaf	WHOLE		HERB OR SPICE	NOT HEAT-TREATED	RAW MATERIAL	NO TREATMENT APPLIED	NO PRESERVATION METHOD USED		C1290	Pérez-Jiménez,J., Saura-Calixto,F.	Food Research International	74	2015	Macromolecular antioxidants or non-extractable polyphenols in fruit and vegetables: Intake in four European countries
51408	Chicory	Cichorium intybus L. ssp. intybus Foliosum Group	Extractable polyphenols (EPP)	5100	µmole/kg DW	ORAC assay	Leaf	WHOLE		HERB OR SPICE	NOT HEAT-TREATED	RAW MATERIAL	NO TREATMENT APPLIED	NO PRESERVATION METHOD USED		C1290	Pérez-Jiménez,J., Saura-Calixto,F.	Food Research International	74	2015	Macromolecular antioxidants or non-extractable polyphenols in fruit and vegetables: Intake in four European countries
51380	Chicory	Cichorium intybus L. ssp. intybus Foliosum Group	Hydrolysable polyphenols (HPP)	9018	mg/kg DW	Folin-Ciocalteu assay	Leaf	WHOLE		HERB OR SPICE	NOT HEAT-TREATED	RAW MATERIAL	NO TREATMENT APPLIED	NO PRESERVATION METHOD USED		C1290	Pérez-Jiménez,J., Saura-Calixto,F.	Food Research International	74	2015	Macromolecular antioxidants or non-extractable polyphenols in fruit and vegetables: Intake in four European countries
51432	Chicory	Cichorium intybus L. ssp. intybus Foliosum Group	Hydrolysable polyphenols (HPP)	53200	µmole/kg DW	ORAC assay	Leaf	WHOLE		HERB OR SPICE	NOT HEAT-TREATED	RAW MATERIAL	NO TREATMENT APPLIED	NO PRESERVATION METHOD USED		C1290	Pérez-Jiménez,J., Saura-Calixto,F.	Food Research International	74	2015	Macromolecular antioxidants or non-extractable polyphenols in fruit and vegetables: Intake in four European countries
51638	Chokeberry	Aronia sp	Non-extractable proanthocyanidins (NEPA)	1500	mg/kg FW	High-performance liquid chromatography	Fruit or berry	WHOLE		FRUIT OR FRUIT PRODUCT	NOT HEAT-TREATED	RAW MATERIAL	NO TREATMENT APPLIED	NO PRESERVATION METHOD USED		C1298	Hellström,J.K., Törrönen,A.R., Mattila,P.H.	Journal of Agricultural and Food Chemistry	57	2009	Proanthocyanidins in Common Food Products of Plant Origin
51652	Cloudberry	Rubus chamaemorus L.	Non-extractable proanthocyanidins (NEPA)	50	mg/kg FW	High-performance liquid chromatography	Fruit or berry	WHOLE		FRUIT OR FRUIT PRODUCT	NOT HEAT-TREATED	RAW MATERIAL	NO TREATMENT APPLIED	NO PRESERVATION METHOD USED		C1298	Hellström,J.K., Törrönen,A.R., Mattila,P.H.	Journal of Agricultural and Food Chemistry	57	2009	Proanthocyanidins in Common Food Products of Plant Origin
51659	Corn, Maize	Zea mays L.	Extractable polyphenols (EPP)	7150	mg/kg DW	Folin-Ciocalteu assay	Seed or kernel	WHOLE	Red maize	RICE OR OTHER GRAIN	NOT HEAT-TREATED	RAW MATERIAL	NO TREATMENT APPLIED	NO PRESERVATION METHOD USED		C1301	Camelo-Méndez,G.	Journal of Chemical, Biological and Physical Sciences	4	2015	Antioxidant Capacity of Extractable and Non-extractable Polyphenols of Pigmented Maize
51658	Corn, Maize	Zea mays L.	Extractable polyphenols (EPP)	7650	mg/kg DW	Folin-Ciocalteu assay	Seed or kernel	WHOLE	Blue maize	RICE OR OTHER GRAIN	NOT HEAT-TREATED	RAW MATERIAL	NO TREATMENT APPLIED	NO PRESERVATION METHOD USED		C1301	Camelo-Méndez,G.	Journal of Chemical, Biological and Physical Sciences	4	2015	Antioxidant Capacity of Extractable and Non-extractable Polyphenols of Pigmented Maize
51661	Corn, Maize	Zea mays L.	Hydrolysable polyphenols (HPP)	11650	mg/kg DW	Folin-Ciocalteu assay	Seed or kernel	WHOLE	Red maize	RICE OR OTHER GRAIN	NOT HEAT-TREATED	RAW MATERIAL	NO TREATMENT APPLIED	NO PRESERVATION METHOD USED		C1301	Camelo-Méndez,G.	Journal of Chemical, Biological and Physical Sciences	4	2015	Antioxidant Capacity of Extractable and Non-extractable Polyphenols of Pigmented Maize
51660	Corn, Maize	Zea mays L.	Hydrolysable polyphenols (HPP)	13550	mg/kg DW	Folin-Ciocalteu assay	Seed or kernel	WHOLE	Blue maize	RICE OR OTHER GRAIN	NOT HEAT-TREATED	RAW MATERIAL	NO TREATMENT APPLIED	NO PRESERVATION METHOD USED		C1301	Camelo-Méndez,G.	Journal of Chemical, Biological and Physical Sciences	4	2015	Antioxidant Capacity of Extractable and Non-extractable Polyphenols of Pigmented Maize
51359	Courgette	Cucurbita pepo L.	Extractable polyphenols (EPP)	4978	mg/kg DW	Folin-Ciocalteu assay	Fruit or berry	WHOLE		VEGETABLE (EXCLUDING POTATO)	NOT HEAT-TREATED	RAW MATERIAL	NO TREATMENT APPLIED	NO PRESERVATION METHOD USED		C1290	Pérez-Jiménez,J., Saura-Calixto,F.	Food Research International	74	2015	Macromolecular antioxidants or non-extractable polyphenols in fruit and vegetables: Intake in four European countries
51413	Courgette	Cucurbita pepo L.	Extractable polyphenols (EPP)	23800	µmole/kg DW	ORAC assay	Fruit or berry	WHOLE		VEGETABLE (EXCLUDING POTATO)	NOT HEAT-TREATED	RAW MATERIAL	NO TREATMENT APPLIED	NO PRESERVATION METHOD USED		C1290	Pérez-Jiménez,J., Saura-Calixto,F.	Food Research International	74	2015	Macromolecular antioxidants or non-extractable polyphenols in fruit and vegetables: Intake in four European countries
51437	Courgette	Cucurbita pepo L.	Hydrolysable polyphenols (HPP)	28000	mg/kg DW	ORAC assay	Fruit or berry	WHOLE		VEGETABLE (EXCLUDING POTATO)	NOT HEAT-TREATED	RAW MATERIAL	NO TREATMENT APPLIED	NO PRESERVATION METHOD USED		C1290	Pérez-Jiménez,J., Saura-Calixto,F.	Food Research International	74	2015	Macromolecular antioxidants or non-extractable polyphenols in fruit and vegetables: Intake in four European countries
51578	Cowberry	Vaccinium vitis-idaea L.	Non-extractable proanthocyanidins (NEPA)	334	mg/kg FW	High-performance liquid chromatography	Fruit or berry	WHOLE		FRUIT OR FRUIT PRODUCT	NOT HEAT-TREATED	RAW MATERIAL	NO TREATMENT APPLIED	NO PRESERVATION METHOD USED		C1298	Hellström,J.K., Törrönen,A.R., Mattila,P.H.	Journal of Agricultural and Food Chemistry	57	2009	Proanthocyanidins in Common Food Products of Plant Origin
51576	Cranberry, European	Vaccinium oxycoccus L.	Non-extractable proanthocyanidins (NEPA)	1810	mg/kg FW	High-performance liquid chromatography	Fruit or berry	WHOLE		FRUIT OR FRUIT PRODUCT	NOT HEAT-TREATED	RAW MATERIAL	NO TREATMENT APPLIED	NO PRESERVATION METHOD USED		C1298	Hellström,J.K., Törrönen,A.R., Mattila,P.H.	Journal of Agricultural and Food Chemistry	57	2009	Proanthocyanidins in Common Food Products of Plant Origin
51360	Cucumber	Cucumis sativus L. var. sativus	Extractable polyphenols (EPP)	1972	mg/kg DW	Folin-Ciocalteu assay	Fruit or berry	WHOLE		VEGETABLE (EXCLUDING POTATO)	NOT HEAT-TREATED	RAW MATERIAL	NO TREATMENT APPLIED	NO PRESERVATION METHOD USED		C1290	Pérez-Jiménez,J., Saura-Calixto,F.	Food Research International	74	2015	Macromolecular antioxidants or non-extractable polyphenols in fruit and vegetables: Intake in four European countries
51412	Cucumber	Cucumis sativus L. var. sativus	Extractable polyphenols (EPP)	12800	µmole/kg DW	ORAC assay	Fruit or berry	WHOLE		VEGETABLE (EXCLUDING POTATO)	NOT HEAT-TREATED	RAW MATERIAL	NO TREATMENT APPLIED	NO PRESERVATION METHOD USED		C1290	Pérez-Jiménez,J., Saura-Calixto,F.	Food Research International	74	2015	Macromolecular antioxidants or non-extractable polyphenols in fruit and vegetables: Intake in four European countries
51384	Cucumber	Cucumis sativus L. var. sativus	Hydrolysable polyphenols (HPP)	4502	mg/kg DW	Folin-Ciocalteu assay	Fruit or berry	WHOLE		VEGETABLE (EXCLUDING POTATO)	NOT HEAT-TREATED	RAW MATERIAL	NO TREATMENT APPLIED	NO PRESERVATION METHOD USED		C1290	Pérez-Jiménez,J., Saura-Calixto,F.	Food Research International	74	2015	Macromolecular antioxidants or non-extractable polyphenols in fruit and vegetables: Intake in four European countries
51436	Cucumber	Cucumis sativus L. var. sativus	Hydrolysable polyphenols (HPP)	9400	µmole/kg DW	ORAC assay	Fruit or berry	WHOLE		VEGETABLE (EXCLUDING POTATO)	NOT HEAT-TREATED	RAW MATERIAL	NO TREATMENT APPLIED	NO PRESERVATION METHOD USED		C1290	Pérez-Jiménez,J., Saura-Calixto,F.	Food Research International	74	2015	Macromolecular antioxidants or non-extractable polyphenols in fruit and vegetables: Intake in four European countries
51581	Gooseberry	Ribes uva-crispa L.	Non-extractable proanthocyanidins (NEPA)	77	mg/kg FW	High-performance liquid chromatography	Fruit or berry	WHOLE	red gooseberry	FRUIT OR FRUIT PRODUCT	NOT HEAT-TREATED	RAW MATERIAL	NO TREATMENT APPLIED	NO PRESERVATION METHOD USED		C1298	Hellström,J.K., Törrönen,A.R., Mattila,P.H.	Journal of Agricultural and Food Chemistry	57	2009	Proanthocyanidins in Common Food Products of Plant Origin
51582	Gooseberry	Ribes uva-crispa L.	Non-extractable proanthocyanidins (NEPA)	270	mg/kg FW	High-performance liquid chromatography	Fruit or berry	WHOLE	yellow gooseberry	FRUIT OR FRUIT PRODUCT	NOT HEAT-TREATED	RAW MATERIAL	NO TREATMENT APPLIED	NO PRESERVATION METHOD USED		C1298	Hellström,J.K., Törrönen,A.R., Mattila,P.H.	Journal of Agricultural and Food Chemistry	57	2009	Proanthocyanidins in Common Food Products of Plant Origin
51934	Grape	Vitis vinifera L. ssp. vinifera	Extractable proanthocyanidins (EPA)	122	mg/kg FW	High-performance liquid chromatography	Fruit or berry	WHOLE	Green variety	FRUIT OR FRUIT PRODUCT	NOT HEAT-TREATED	RAW MATERIAL	NO TREATMENT APPLIED	NO PRESERVATION METHOD USED	The data documented in this paper is for extractable and non extractable procyanidins	C1305	Hellström,J.K., Mattila,P.H.	Journal of Agricultural and Food Chemistry	56	2008	HPLC Determination of Extractable and Unextractable Proanthocyanidins in Plant Materials
51933	Grape	Vitis vinifera L. ssp. vinifera	Extractable proanthocyanidins (EPA)	305	mg/kg FW	High-performance liquid chromatography	Fruit or berry	WHOLE	Red variety	FRUIT OR FRUIT PRODUCT	NOT HEAT-TREATED	RAW MATERIAL	NO TREATMENT APPLIED	NO PRESERVATION METHOD USED	The data documented in this paper is for extractable and non extractable procyanidins	C1305	Hellström,J.K., Mattila,P.H.	Journal of Agricultural and Food Chemistry	56	2008	HPLC Determination of Extractable and Unextractable Proanthocyanidins in Plant Materials
51361	Grape	Vitis vinifera L. ssp. vinifera	Extractable polyphenols (EPP)	18700	mg/kg DW	Folin-Ciocalteu assay	Fruit or berry	WHOLE		FRUIT OR FRUIT PRODUCT	NOT HEAT-TREATED	RAW MATERIAL	NO TREATMENT APPLIED	NO PRESERVATION METHOD USED		C1290	Pérez-Jiménez,J., Saura-Calixto,F.	Food Research International	74	2015	Macromolecular antioxidants or non-extractable polyphenols in fruit and vegetables: Intake in four European countries
51411	Grape	Vitis vinifera L. ssp. vinifera	Extractable polyphenols (EPP)	49300	µmole/kg DW	ORAC assay	Fruit or berry	WHOLE		FRUIT OR FRUIT PRODUCT	NOT HEAT-TREATED	RAW MATERIAL	NO TREATMENT APPLIED	NO PRESERVATION METHOD USED		C1290	Pérez-Jiménez,J., Saura-Calixto,F.	Food Research International	74	2015	Macromolecular antioxidants or non-extractable polyphenols in fruit and vegetables: Intake in four European countries
51383	Grape	Vitis vinifera L. ssp. vinifera	Hydrolysable polyphenols (HPP)	3197	mg/kg DW	Folin-Ciocalteu assay	Fruit or berry	WHOLE		FRUIT OR FRUIT PRODUCT	NOT HEAT-TREATED	RAW MATERIAL	NO TREATMENT APPLIED	NO PRESERVATION METHOD USED		C1290	Pérez-Jiménez,J., Saura-Calixto,F.	Food Research International	74	2015	Macromolecular antioxidants or non-extractable polyphenols in fruit and vegetables: Intake in four European countries
51435	Grape	Vitis vinifera L. ssp. vinifera	Hydrolysable polyphenols (HPP)	49000	µmole/kg DW	ORAC assay	Fruit or berry	WHOLE		FRUIT OR FRUIT PRODUCT	NOT HEAT-TREATED	RAW MATERIAL	NO TREATMENT APPLIED	NO PRESERVATION METHOD USED		C1290	Pérez-Jiménez,J., Saura-Calixto,F.	Food Research International	74	2015	Macromolecular antioxidants or non-extractable polyphenols in fruit and vegetables: Intake in four European countries
51935	Grape	Vitis vinifera L. ssp. vinifera	Non-extractable proanthocyanidins (NEPA)	204	mg/kg FW	High-performance liquid chromatography	Fruit or berry	WHOLE	Green variety	FRUIT OR FRUIT PRODUCT	NOT HEAT-TREATED	RAW MATERIAL	NO TREATMENT APPLIED	NO PRESERVATION METHOD USED	The data documented in this paper is for extractable and non extractable procyanidins	C1305	Hellström,J.K., Mattila,P.H.	Journal of Agricultural and Food Chemistry	56	2008	HPLC Determination of Extractable and Unextractable Proanthocyanidins in Plant Materials
51936	Grape	Vitis vinifera L. ssp. vinifera	Non-extractable proanthocyanidins (NEPA)	235	mg/kg FW	High-performance liquid chromatography	Fruit or berry	WHOLE	Red variety	FRUIT OR FRUIT PRODUCT	NOT HEAT-TREATED	RAW MATERIAL	NO TREATMENT APPLIED	NO PRESERVATION METHOD USED	The data documented in this paper is for extractable and non extractable procyanidins	C1305	Hellström,J.K., Mattila,P.H.	Journal of Agricultural and Food Chemistry	56	2008	HPLC Determination of Extractable and Unextractable Proanthocyanidins in Plant Materials
51570	Grape	Vitis vinifera L. ssp. vinifera	Non-extractable proanthocyanidins (NEPA)	1680	mg/kg DW	Spectrophotometry	Fruit or berry	WHOLE	White grape	FRUIT OR FRUIT PRODUCT	NOT HEAT-TREATED	RAW MATERIAL	NO TREATMENT APPLIED	NO PRESERVATION METHOD USED		C1297	Pérez-Jiménez,J., Arranz,S., Saura-Calixto,F.	Food Research International	42	2009	Proanthocyanidin content in foods is largely underestimated in the literature data: An approach to quantification of the missing proanthocyanidins
51402	Grape	Vitis vinifera L. ssp. vinifera	Non-extractable proanthocyanidins (NEPA)	2941	mg/kg DW	Spectrophotometry	Fruit or berry	WHOLE		FRUIT OR FRUIT PRODUCT	NOT HEAT-TREATED	RAW MATERIAL	NO TREATMENT APPLIED	NO PRESERVATION METHOD USED		C1290	Pérez-Jiménez,J., Saura-Calixto,F.	Food Research International	74	2015	Macromolecular antioxidants or non-extractable polyphenols in fruit and vegetables: Intake in four European countries
52498	Grape	Vitis vinifera L. ssp. vinifera	Extractable polyphenols (EPP)	49679.8	mg/kg DW	Folin-Ciocalteu assay	Skin or bran (pericarp)	WHOLE	Grape pomace, wine industry waste White variety	FRUIT OR FRUIT PRODUCT	NOT HEAT-TREATED	RAW MATERIAL	NO TREATMENT APPLIED	FREEZE-DRIED		C1329	Solari-Godiño,A., Lindo-Rojas,I. and Pandia-Estrada,S.	Cogent Food & Agriculture	3	2017	Determination of phenolic compounds and evaluation of antioxidant capacity of two grapes residues (Vitis vinifera) of varieties dried: Quebranta (red) and Torontel (white)
52497	Grape	Vitis vinifera L. ssp. vinifera	Extractable polyphenols (EPP)	55800.7	mg/kg DW	Folin-Ciocalteu assay	Skin or bran (pericarp)	WHOLE	Grape pomace, wine industry waste Red variety	FRUIT OR FRUIT PRODUCT	NOT HEAT-TREATED	RAW MATERIAL	NO TREATMENT APPLIED	FREEZE-DRIED		C1329	Solari-Godiño,A., Lindo-Rojas,I. and Pandia-Estrada,S.	Cogent Food & Agriculture	3	2017	Determination of phenolic compounds and evaluation of antioxidant capacity of two grapes residues (Vitis vinifera) of varieties dried: Quebranta (red) and Torontel (white)
52509	Grape	Vitis vinifera L. ssp. vinifera	Extractable polyphenols (EPP)	293220	µmole/kg DW	FRAP assay	Skin or bran (pericarp)	WHOLE	Grape pomace, wine industry waste White variety	FRUIT OR FRUIT PRODUCT	NOT HEAT-TREATED	RAW MATERIAL	NO TREATMENT APPLIED	FREEZE-DRIED		C1329	Solari-Godiño,A., Lindo-Rojas,I. and Pandia-Estrada,S.	Cogent Food & Agriculture	3	2017	Determination of phenolic compounds and evaluation of antioxidant capacity of two grapes residues (Vitis vinifera) of varieties dried: Quebranta (red) and Torontel (white)
52510	Grape	Vitis vinifera L. ssp. vinifera	Extractable polyphenols (EPP)	335190	µmole/kg DW	FRAP assay	Skin or bran (pericarp)	WHOLE	Grape pomace, wine industry waste Red variety	FRUIT OR FRUIT PRODUCT	NOT HEAT-TREATED	RAW MATERIAL	NO TREATMENT APPLIED	FREEZE-DRIED		C1329	Solari-Godiño,A., Lindo-Rojas,I. and Pandia-Estrada,S.	Cogent Food & Agriculture	3	2017	Determination of phenolic compounds and evaluation of antioxidant capacity of two grapes residues (Vitis vinifera) of varieties dried: Quebranta (red) and Torontel (white)
52503	Grape	Vitis vinifera L. ssp. vinifera	Extractable polyphenols (EPP)	2786820	mg/kg DW	DPPH assay	Skin or bran (pericarp)	WHOLE	Grape pomace, wine industry waste White variety	FRUIT OR FRUIT PRODUCT	NOT HEAT-TREATED	RAW MATERIAL	NO TREATMENT APPLIED	FREEZE-DRIED		C1329	Solari-Godiño,A., Lindo-Rojas,I. and Pandia-Estrada,S.	Cogent Food & Agriculture	3	2017	Determination of phenolic compounds and evaluation of antioxidant capacity of two grapes residues (Vitis vinifera) of varieties dried: Quebranta (red) and Torontel (white)
52504	Grape	Vitis vinifera L. ssp. vinifera	Extractable polyphenols (EPP)	3329890	mg/kg DW	DPPH assay	Skin or bran (pericarp)	WHOLE	Grape pomace, wine industry waste Red variety	FRUIT OR FRUIT PRODUCT	NOT HEAT-TREATED	RAW MATERIAL	NO TREATMENT APPLIED	FREEZE-DRIED		C1329	Solari-Godiño,A., Lindo-Rojas,I. and Pandia-Estrada,S.	Cogent Food & Agriculture	3	2017	Determination of phenolic compounds and evaluation of antioxidant capacity of two grapes residues (Vitis vinifera) of varieties dried: Quebranta (red) and Torontel (white)
52511	Grape	Vitis vinifera L. ssp. vinifera	Hydrolysable polyphenols (HPP)	18980	µmole/kg DW	FRAP assay	Skin or bran (pericarp)	WHOLE	Grape pomace, wine industry waste Red variety	FRUIT OR FRUIT PRODUCT	NOT HEAT-TREATED	RAW MATERIAL	NO TREATMENT APPLIED	FREEZE-DRIED		C1329	Solari-Godiño,A., Lindo-Rojas,I. and Pandia-Estrada,S.	Cogent Food & Agriculture	3	2017	Determination of phenolic compounds and evaluation of antioxidant capacity of two grapes residues (Vitis vinifera) of varieties dried: Quebranta (red) and Torontel (white)
52512	Grape	Vitis vinifera L. ssp. vinifera	Hydrolysable polyphenols (HPP)	22230	µmole/kg DW	FRAP assay	Skin or bran (pericarp)	WHOLE	Grape pomace, wine industry waste White variety	FRUIT OR FRUIT PRODUCT	NOT HEAT-TREATED	RAW MATERIAL	NO TREATMENT APPLIED	FREEZE-DRIED		C1329	Solari-Godiño,A., Lindo-Rojas,I. and Pandia-Estrada,S.	Cogent Food & Agriculture	3	2017	Determination of phenolic compounds and evaluation of antioxidant capacity of two grapes residues (Vitis vinifera) of varieties dried: Quebranta (red) and Torontel (white)
52499	Grape	Vitis vinifera L. ssp. vinifera	Hydrolysable polyphenols (HPP)	30971.7	mg/kg DW	Folin-Ciocalteu assay	Skin or bran (pericarp)	WHOLE	Grape pomace, wine industry waste Red variety	FRUIT OR FRUIT PRODUCT	NOT HEAT-TREATED	RAW MATERIAL	NO TREATMENT APPLIED	FREEZE-DRIED		C1329	Solari-Godiño,A., Lindo-Rojas,I. and Pandia-Estrada,S.	Cogent Food & Agriculture	3	2017	Determination of phenolic compounds and evaluation of antioxidant capacity of two grapes residues (Vitis vinifera) of varieties dried: Quebranta (red) and Torontel (white)
52500	Grape	Vitis vinifera L. ssp. vinifera	Hydrolysable polyphenols (HPP)	34155.4	mg/kg DW	Folin-Ciocalteu assay	Skin or bran (pericarp)	WHOLE	Grape pomace, wine industry waste White variety	FRUIT OR FRUIT PRODUCT	NOT HEAT-TREATED	RAW MATERIAL	NO TREATMENT APPLIED	FREEZE-DRIED		C1329	Solari-Godiño,A., Lindo-Rojas,I. and Pandia-Estrada,S.	Cogent Food & Agriculture	3	2017	Determination of phenolic compounds and evaluation of antioxidant capacity of two grapes residues (Vitis vinifera) of varieties dried: Quebranta (red) and Torontel (white)
52506	Grape	Vitis vinifera L. ssp. vinifera	Hydrolysable polyphenols (HPP)	2069480	mg/kg DW	DPPH assay	Skin or bran (pericarp)	WHOLE	Grape pomace, wine industry waste Red variety	FRUIT OR FRUIT PRODUCT	NOT HEAT-TREATED	RAW MATERIAL	NO TREATMENT APPLIED	FREEZE-DRIED		C1329	Solari-Godiño,A., Lindo-Rojas,I. and Pandia-Estrada,S.	Cogent Food & Agriculture	3	2017	Determination of phenolic compounds and evaluation of antioxidant capacity of two grapes residues (Vitis vinifera) of varieties dried: Quebranta (red) and Torontel (white)
52505	Grape	Vitis vinifera L. ssp. vinifera	Hydrolysable polyphenols (HPP)	3391700	mg/kg DW	DPPH assay	Skin or bran (pericarp)	WHOLE	Grape pomace, wine industry waste White variety	FRUIT OR FRUIT PRODUCT	NOT HEAT-TREATED	RAW MATERIAL	NO TREATMENT APPLIED	FREEZE-DRIED		C1329	Solari-Godiño,A., Lindo-Rojas,I. and Pandia-Estrada,S.	Cogent Food & Agriculture	3	2017	Determination of phenolic compounds and evaluation of antioxidant capacity of two grapes residues (Vitis vinifera) of varieties dried: Quebranta (red) and Torontel (white)
52501	Grape	Vitis vinifera L. ssp. vinifera	Non-extractable proanthocyanidins (NEPA)	300148.2	mg/kg DW	Folin-Ciocalteu assay	Skin or bran (pericarp)	WHOLE	Grape pomace, wine industry waste Red variety	FRUIT OR FRUIT PRODUCT	NOT HEAT-TREATED	RAW MATERIAL	NO TREATMENT APPLIED	FREEZE-DRIED		C1329	Solari-Godiño,A., Lindo-Rojas,I. and Pandia-Estrada,S.	Cogent Food & Agriculture	3	2017	Determination of phenolic compounds and evaluation of antioxidant capacity of two grapes residues (Vitis vinifera) of varieties dried: Quebranta (red) and Torontel (white)
52502	Grape	Vitis vinifera L. ssp. vinifera	Non-extractable proanthocyanidins (NEPA)	313147.2	mg/kg DW	Folin-Ciocalteu assay	Skin or bran (pericarp)	WHOLE	Grape pomace, wine industry waste White variety	FRUIT OR FRUIT PRODUCT	NOT HEAT-TREATED	RAW MATERIAL	NO TREATMENT APPLIED	FREEZE-DRIED		C1329	Solari-Godiño,A., Lindo-Rojas,I. and Pandia-Estrada,S.	Cogent Food & Agriculture	3	2017	Determination of phenolic compounds and evaluation of antioxidant capacity of two grapes residues (Vitis vinifera) of varieties dried: Quebranta (red) and Torontel (white)
52513	Grape	Vitis vinifera L. ssp. vinifera	Non-extractable proanthocyanidins (NEPA)	340430	µmole/kg DW	FRAP assay	Skin or bran (pericarp)	WHOLE	Grape pomace, wine industry waste White variety	FRUIT OR FRUIT PRODUCT	NOT HEAT-TREATED	RAW MATERIAL	NO TREATMENT APPLIED	FREEZE-DRIED		C1329	Solari-Godiño,A., Lindo-Rojas,I. and Pandia-Estrada,S.	Cogent Food & Agriculture	3	2017	Determination of phenolic compounds and evaluation of antioxidant capacity of two grapes residues (Vitis vinifera) of varieties dried: Quebranta (red) and Torontel (white)
52514	Grape	Vitis vinifera L. ssp. vinifera	Non-extractable proanthocyanidins (NEPA)	346950	µmole/kg DW	FRAP assay	Skin or bran (pericarp)	WHOLE	Grape pomace, wine industry waste Red variety	FRUIT OR FRUIT PRODUCT	NOT HEAT-TREATED	RAW MATERIAL	NO TREATMENT APPLIED	FREEZE-DRIED		C1329	Solari-Godiño,A., Lindo-Rojas,I. and Pandia-Estrada,S.	Cogent Food & Agriculture	3	2017	Determination of phenolic compounds and evaluation of antioxidant capacity of two grapes residues (Vitis vinifera) of varieties dried: Quebranta (red) and Torontel (white)
52507	Grape	Vitis vinifera L. ssp. vinifera	Non-extractable proanthocyanidins (NEPA)	2534420	mg/kg DW	DPPH assay	Skin or bran (pericarp)	WHOLE	Grape pomace, wine industry waste Red variety	FRUIT OR FRUIT PRODUCT	NOT HEAT-TREATED	RAW MATERIAL	NO TREATMENT APPLIED	FREEZE-DRIED		C1329	Solari-Godiño,A., Lindo-Rojas,I. and Pandia-Estrada,S.	Cogent Food & Agriculture	3	2017	Determination of phenolic compounds and evaluation of antioxidant capacity of two grapes residues (Vitis vinifera) of varieties dried: Quebranta (red) and Torontel (white)
52508	Grape	Vitis vinifera L. ssp. vinifera	Non-extractable proanthocyanidins (NEPA)	2697480	mg/kg DW	DPPH assay	Skin or bran (pericarp)	WHOLE	Grape pomace, wine industry waste White variety	FRUIT OR FRUIT PRODUCT	NOT HEAT-TREATED	RAW MATERIAL	NO TREATMENT APPLIED	FREEZE-DRIED		C1329	Solari-Godiño,A., Lindo-Rojas,I. and Pandia-Estrada,S.	Cogent Food & Agriculture	3	2017	Determination of phenolic compounds and evaluation of antioxidant capacity of two grapes residues (Vitis vinifera) of varieties dried: Quebranta (red) and Torontel (white)
52121	Guava	Psidium guajava L.	Extractable polyphenols (EPP)	7500	mg/kg DW	High-performance liquid chromatography	Fruit or berry	WHOLE	NOTE THIS IS THE BY PRODUCT OF JUICE PRODUCTION including peel and remnants of pulp	FRUIT OR FRUIT PRODUCT	NOT HEAT-TREATED	RAW MATERIAL	TREATMENT APPLIED NOT KNOWN	NO PRESERVATION METHOD USED		C1308	Amaya-Cruz, D.M., Rodriguez-Gonzalez, S., Perez-Ramirez, I.F., Loarca-Pina, G., Amaya-Llano, S., Gallegos-Corona, M.A., Reynoso-Camacho, R.	Journal of Functional Foods	17	2015	Juice by-products as a source of dietary fibre and antioxidants and their effect on hepatic steatosis
52124	Guava	Psidium guajava L.	Hydrolysable polyphenols (HPP)	690	mg/kg DW	High-performance liquid chromatography	Fruit or berry	WHOLE	NOTE THIS IS THE BY PRODUCT OF JUICE PRODUCTION including peel and remnants of pulp	FRUIT OR FRUIT PRODUCT	NOT HEAT-TREATED	RAW MATERIAL	TREATMENT APPLIED NOT KNOWN	NO PRESERVATION METHOD USED		C1308	Amaya-Cruz, D.M., Rodriguez-Gonzalez, S., Perez-Ramirez, I.F., Loarca-Pina, G., Amaya-Llano, S., Gallegos-Corona, M.A., Reynoso-Camacho, R.	Journal of Functional Foods	17	2015	Juice by-products as a source of dietary fibre and antioxidants and their effect on hepatic steatosis
51572	Kiwi	Actinidia deliciosa (A.Chev.) C.F.Liang & A.R.Ferguson	Non-extractable proanthocyanidins (NEPA)	97	mg/kg FW	High-performance liquid chromatography	Fruit or berry	WHOLE		FRUIT OR FRUIT PRODUCT	NOT HEAT-TREATED	RAW MATERIAL	NO TREATMENT APPLIED	NO PRESERVATION METHOD USED		C1298	Hellström,J.K., Törrönen,A.R., Mattila,P.H.	Journal of Agricultural and Food Chemistry	57	2009	Proanthocyanidins in Common Food Products of Plant Origin
51337	Lentil	Lens culinaris Medik. ssp. culinaris	Extractable polyphenols (EPP)	3738.9	mg/kg DW	Folin-Ciocalteu assay	Seed or kernel	FINELY GROUND	Laboratory produced red lentil flour	PULSE OR PULSE PRODUCT	NOT HEAT-TREATED	RAW MATERIAL	NO TREATMENT APPLIED	NO PRESERVATION METHOD USED		C1285	Durazzo,A., Turfani,V., Azzini,E., Maiani,G., Carcea,M.	Food Chemistry	140	2013	Phenols, lignans and antioxidant properties of legume and sweet chestnut flours
51342	Lentil	Lens culinaris Medik. ssp. culinaris	Extractable polyphenols (EPP)	7373.2	mg/kg DW	Folin-Ciocalteu assay	Seed or kernel	FINELY GROUND	Laboratory produced green lentil flour	PULSE OR PULSE PRODUCT	NOT HEAT-TREATED	RAW MATERIAL	NO TREATMENT APPLIED	NO PRESERVATION METHOD USED		C1285	Durazzo,A., Turfani,V., Azzini,E., Maiani,G., Carcea,M.	Food Chemistry	140	2013	Phenols, lignans and antioxidant properties of legume and sweet chestnut flours
51338	Lentil	Lens culinaris Medik. ssp. culinaris	Extractable polyphenols (EPP)	66370	µmole/kg DW	FRAP assay	Seed or kernel	FINELY GROUND	Laboratory produced red lentil flour	PULSE OR PULSE PRODUCT	NOT HEAT-TREATED	RAW MATERIAL	NO TREATMENT APPLIED	NO PRESERVATION METHOD USED		C1285	Durazzo,A., Turfani,V., Azzini,E., Maiani,G., Carcea,M.	Food Chemistry	140	2013	Phenols, lignans and antioxidant properties of legume and sweet chestnut flours
51340	Lentil	Lens culinaris Medik. ssp. culinaris	Extractable polyphenols (EPP)	140320	µmole/kg DW	FRAP assay	Seed or kernel	FINELY GROUND	Laboratory produced green lentil flour	PULSE OR PULSE PRODUCT	NOT HEAT-TREATED	RAW MATERIAL	NO TREATMENT APPLIED	NO PRESERVATION METHOD USED		C1285	Durazzo,A., Turfani,V., Azzini,E., Maiani,G., Carcea,M.	Food Chemistry	140	2013	Phenols, lignans and antioxidant properties of legume and sweet chestnut flours
51336	Lentil	Lens culinaris Medik. ssp. culinaris	Hydrolysable polyphenols (HPP)	13489.7	mg/kg DW	Folin-Ciocalteu assay	Seed or kernel	FINELY GROUND	Laboratory produced red lentil flour	PULSE OR PULSE PRODUCT	NOT HEAT-TREATED	RAW MATERIAL	NO TREATMENT APPLIED	NO PRESERVATION METHOD USED		C1285	Durazzo,A., Turfani,V., Azzini,E., Maiani,G., Carcea,M.	Food Chemistry	140	2013	Phenols, lignans and antioxidant properties of legume and sweet chestnut flours
51343	Lentil	Lens culinaris Medik. ssp. culinaris	Hydrolysable polyphenols (HPP)	14929.3	mg/kg DW	Folin-Ciocalteu assay	Seed or kernel	FINELY GROUND	Laboratory produced green lentil flour	PULSE OR PULSE PRODUCT	NOT HEAT-TREATED	RAW MATERIAL	NO TREATMENT APPLIED	NO PRESERVATION METHOD USED		C1285	Durazzo,A., Turfani,V., Azzini,E., Maiani,G., Carcea,M.	Food Chemistry	140	2013	Phenols, lignans and antioxidant properties of legume and sweet chestnut flours
51339	Lentil	Lens culinaris Medik. ssp. culinaris	Hydrolysable polyphenols (HPP)	87930	µmole/kg DW	FRAP assay	Seed or kernel	FINELY GROUND	Laboratory produced red lentil flour	PULSE OR PULSE PRODUCT	NOT HEAT-TREATED	RAW MATERIAL	NO TREATMENT APPLIED	NO PRESERVATION METHOD USED		C1285	Durazzo,A., Turfani,V., Azzini,E., Maiani,G., Carcea,M.	Food Chemistry	140	2013	Phenols, lignans and antioxidant properties of legume and sweet chestnut flours
51341	Lentil	Lens culinaris Medik. ssp. culinaris	Hydrolysable polyphenols (HPP)	101250	µmole/kg DW	FRAP assay	Seed or kernel	FINELY GROUND	Laboratory produced green lentil flour	PULSE OR PULSE PRODUCT	NOT HEAT-TREATED	RAW MATERIAL	NO TREATMENT APPLIED	NO PRESERVATION METHOD USED		C1285	Durazzo,A., Turfani,V., Azzini,E., Maiani,G., Carcea,M.	Food Chemistry	140	2013	Phenols, lignans and antioxidant properties of legume and sweet chestnut flours
51363	Lettuce	Lactuca sativa L.	Extractable polyphenols (EPP)	6890	mg/kg DW	Folin-Ciocalteu assay	Head (plant)	WHOLE		VEGETABLE (EXCLUDING POTATO)	NOT HEAT-TREATED	RAW MATERIAL	NO TREATMENT APPLIED	NO PRESERVATION METHOD USED		C1290	Pérez-Jiménez,J., Saura-Calixto,F.	Food Research International	74	2015	Macromolecular antioxidants or non-extractable polyphenols in fruit and vegetables: Intake in four European countries
51418	Lettuce	Lactuca sativa L.	Extractable polyphenols (EPP)	90700	µmole/kg DW	ORAC assay	Head (plant)	WHOLE		VEGETABLE (EXCLUDING POTATO)	NOT HEAT-TREATED	RAW MATERIAL	NO TREATMENT APPLIED	NO PRESERVATION METHOD USED		C1290	Pérez-Jiménez,J., Saura-Calixto,F.	Food Research International	74	2015	Macromolecular antioxidants or non-extractable polyphenols in fruit and vegetables: Intake in four European countries
51443	Lettuce	Lactuca sativa L.	Hydrolysable polyphenols (HPP)	49900	µmole/kg DW	ORAC assay	Head (plant)	WHOLE		VEGETABLE (EXCLUDING POTATO)	NOT HEAT-TREATED	RAW MATERIAL	NO TREATMENT APPLIED	NO PRESERVATION METHOD USED		C1290	Pérez-Jiménez,J., Saura-Calixto,F.	Food Research International	74	2015	Macromolecular antioxidants or non-extractable polyphenols in fruit and vegetables: Intake in four European countries
51379	Mandarin	Citrus reticulata Blanco	Extractable polyphenols (EPP)	4815	mg/kg DW	Folin-Ciocalteu assay	Fruit or berry	WHOLE		FRUIT OR FRUIT PRODUCT	NOT HEAT-TREATED	RAW MATERIAL	NO TREATMENT APPLIED	NO PRESERVATION METHOD USED		C1290	Pérez-Jiménez,J., Saura-Calixto,F.	Food Research International	74	2015	Macromolecular antioxidants or non-extractable polyphenols in fruit and vegetables: Intake in four European countries
51427	Mandarin	Citrus reticulata Blanco	Extractable polyphenols (EPP)	31700	mg/kg DW	ORAC assay	Fruit or berry	WHOLE		FRUIT OR FRUIT PRODUCT	NOT HEAT-TREATED	RAW MATERIAL	NO TREATMENT APPLIED	NO PRESERVATION METHOD USED		C1290	Pérez-Jiménez,J., Saura-Calixto,F.	Food Research International	74	2015	Macromolecular antioxidants or non-extractable polyphenols in fruit and vegetables: Intake in four European countries
51364	Mandarin	Citrus reticulata Blanco	Hydrolysable polyphenols (HPP)	3578	mg/kg DW	Folin-Ciocalteu assay	Fruit or berry	WHOLE		FRUIT OR FRUIT PRODUCT	NOT HEAT-TREATED	RAW MATERIAL	NO TREATMENT APPLIED	NO PRESERVATION METHOD USED		C1290	Pérez-Jiménez,J., Saura-Calixto,F.	Food Research International	74	2015	Macromolecular antioxidants or non-extractable polyphenols in fruit and vegetables: Intake in four European countries
51431	Mandarin	Citrus reticulata Blanco	Hydrolysable polyphenols (HPP)	45000	µmole/kg DW	ORAC assay	Fruit or berry	WHOLE		FRUIT OR FRUIT PRODUCT	NOT HEAT-TREATED	RAW MATERIAL	NO TREATMENT APPLIED	NO PRESERVATION METHOD USED		C1290	Pérez-Jiménez,J., Saura-Calixto,F.	Food Research International	74	2015	Macromolecular antioxidants or non-extractable polyphenols in fruit and vegetables: Intake in four European countries
52087	Mango	Mangifera indica L.	Extractable polyphenols (EPP)	1443.4	mg/kg FW	DPPH assay	Fruit or berry	WHOLE	Pulp	FRUIT OR FRUIT PRODUCT	NOT HEAT-TREATED	RAW MATERIAL	NO TREATMENT APPLIED	NO PRESERVATION METHOD USED		C1314	VELDERRAIN-RODRÍGUEZ,G., QUIRÓS-SAUCEDA,A.,MERCADO-MERCADO,G., AYALA-ZAVALA,J.,ASTIAZARÁN-GARCÍA,H.,ROBLES-SÁNCHEZ,R.,WALL-MEDRANO,A.,SAYAGO-AYERDI,S.,GONZÁLEZ-AGUILAR,G.	Food Science and Technology	36	2016	Effect of dietary fiber on the bioaccessibility of phenolic compounds of mango, papaya and pineapple fruits by an in vitro digestion model
52494	Mango	Mangifera indica L.	Extractable polyphenols (EPP)	9870	mg/kg DW	Folin-Ciocalteu assay	Fruit or berry	WHOLE		FRUIT OR FRUIT PRODUCT	NOT HEAT-TREATED	RAW MATERIAL	NO TREATMENT APPLIED	NO PRESERVATION METHOD USED		C1331	Olivas-Aguirre,F.J., González-Aguilar,G.A., Velderrain-Rodríguez,G.R., Torres-Moreno,H., Robles-Zepeda,R.E., Vázquez-Flores,A.A., Rosa,L.A. and Wall-Medrano,A.	International Journal of Food Science & Technology	57	2017	Radical scavenging and anti-proliferative capacity of three freeze-dried tropical fruits
52119	Mango	Mangifera indica L.	Extractable polyphenols (EPP)	102000	mg/kg DW	High-performance liquid chromatography	Fruit or berry	SEMILIQUID WITH SOLID PIECES	NOTE THIS IS THE BY PRODUCT OF JUICE PRODUCTION including peel and remnants of pulp	FRUIT OR FRUIT PRODUCT	NOT HEAT-TREATED	RAW MATERIAL	TREATMENT APPLIED NOT KNOWN	NO PRESERVATION METHOD USED		C1308	Amaya-Cruz, D.M., Rodriguez-Gonzalez, S., Perez-Ramirez, I.F., Loarca-Pina, G., Amaya-Llano, S., Gallegos-Corona, M.A., Reynoso-Camacho, R.	Journal of Functional Foods	17	2015	Juice by-products as a source of dietary fibre and antioxidants and their effect on hepatic steatosis
52088	Mango	Mangifera indica L.	Hydrolysable polyphenols (HPP)	1299.5	mg/kg FW	DPPH assay	Fruit or berry	WHOLE	Pulp	FRUIT OR FRUIT PRODUCT	NOT HEAT-TREATED	RAW MATERIAL	NO TREATMENT APPLIED	NO PRESERVATION METHOD USED		C1314	VELDERRAIN-RODRÍGUEZ,G., QUIRÓS-SAUCEDA,A.,MERCADO-MERCADO,G., AYALA-ZAVALA,J.,ASTIAZARÁN-GARCÍA,H.,ROBLES-SÁNCHEZ,R.,WALL-MEDRANO,A.,SAYAGO-AYERDI,S.,GONZÁLEZ-AGUILAR,G.	Food Science and Technology	36	2016	Effect of dietary fiber on the bioaccessibility of phenolic compounds of mango, papaya and pineapple fruits by an in vitro digestion model
52125	Mango	Mangifera indica L.	Hydrolysable polyphenols (HPP)	3380	mg/kg DW	High-performance liquid chromatography	Fruit or berry	WHOLE	NOTE THIS IS THE BY PRODUCT OF JUICE PRODUCTION including peel and remnants of pulp	FRUIT OR FRUIT PRODUCT	NOT HEAT-TREATED	RAW MATERIAL	TREATMENT APPLIED NOT KNOWN	NO PRESERVATION METHOD USED		C1308	Amaya-Cruz, D.M., Rodriguez-Gonzalez, S., Perez-Ramirez, I.F., Loarca-Pina, G., Amaya-Llano, S., Gallegos-Corona, M.A., Reynoso-Camacho, R.	Journal of Functional Foods	17	2015	Juice by-products as a source of dietary fibre and antioxidants and their effect on hepatic steatosis
51366	Melon	Cucumis melo L. ssp. melo	Extractable polyphenols (EPP)	4278	mg/kg DW	Folin-Ciocalteu assay	Fruit or berry	WHOLE		FRUIT OR FRUIT PRODUCT	NOT HEAT-TREATED	RAW MATERIAL	NO TREATMENT APPLIED	NO PRESERVATION METHOD USED		C1290	Pérez-Jiménez,J., Saura-Calixto,F.	Food Research International	74	2015	Macromolecular antioxidants or non-extractable polyphenols in fruit and vegetables: Intake in four European countries
51417	Melon	Cucumis melo L. ssp. melo	Extractable polyphenols (EPP)	16400	µmole/kg DW	ORAC assay	Fruit or berry	WHOLE		FRUIT OR FRUIT PRODUCT	NOT HEAT-TREATED	RAW MATERIAL	NO TREATMENT APPLIED	NO PRESERVATION METHOD USED		C1290	Pérez-Jiménez,J., Saura-Calixto,F.	Food Research International	74	2015	Macromolecular antioxidants or non-extractable polyphenols in fruit and vegetables: Intake in four European countries
51442	Melon	Cucumis melo L. ssp. melo	Hydrolysable polyphenols (HPP)	36000	µmole/kg DW	ORAC assay	Fruit or berry	WHOLE		FRUIT OR FRUIT PRODUCT	NOT HEAT-TREATED	RAW MATERIAL	NO TREATMENT APPLIED	NO PRESERVATION METHOD USED		C1290	Pérez-Jiménez,J., Saura-Calixto,F.	Food Research International	74	2015	Macromolecular antioxidants or non-extractable polyphenols in fruit and vegetables: Intake in four European countries
51597	Mombin, yellow	Spondias mombin L.	Extractable polyphenols (EPP)	5790	mg/kg DW	Folin-Ciocalteu assay	Fruit or berry	WHOLE		FRUIT OR FRUIT PRODUCT	NOT HEAT-TREATED	RAW MATERIAL	NO TREATMENT APPLIED	NO PRESERVATION METHOD USED		C1300	Rufino,M.S.M., Alves,R.E., de Brito,E.S., Pérez-Jiménez,J., Saura-Calixto,F., Mancini-Filho,J.	Food Chemistry	121	2010	Bioactive compounds and antioxidant capacities of 18 non-traditional tropical fruits from Brazil
51598	Mombin, yellow	Spondias mombin L.	Extractable polyphenols (EPP)	40700	µmole/kg DW	ABTS assay	Fruit or berry	WHOLE		FRUIT OR FRUIT PRODUCT	NOT HEAT-TREATED	RAW MATERIAL	NO TREATMENT APPLIED	NO PRESERVATION METHOD USED		C1300	Rufino,M.S.M., Alves,R.E., de Brito,E.S., Pérez-Jiménez,J., Saura-Calixto,F., Mancini-Filho,J.	Food Chemistry	121	2010	Bioactive compounds and antioxidant capacities of 18 non-traditional tropical fruits from Brazil
51599	Mombin, yellow	Spondias mombin L.	Extractable polyphenols (EPP)	97600	µmole/kg DW	FRAP assay	Fruit or berry	WHOLE		FRUIT OR FRUIT PRODUCT	NOT HEAT-TREATED	RAW MATERIAL	NO TREATMENT APPLIED	NO PRESERVATION METHOD USED		C1300	Rufino,M.S.M., Alves,R.E., de Brito,E.S., Pérez-Jiménez,J., Saura-Calixto,F., Mancini-Filho,J.	Food Chemistry	121	2010	Bioactive compounds and antioxidant capacities of 18 non-traditional tropical fruits from Brazil
51508	Nectarine	Prunus persica (L.) Batsch var. nucipersica (Suckow) C.K.Schneid.	Extractable polyphenols (EPP)	102.7	mg/kg FW	High-performance liquid chromatography	Fruit or berry	WHOLE		FRUIT OR FRUIT PRODUCT	NOT HEAT-TREATED	RAW MATERIAL	NO TREATMENT APPLIED	NO PRESERVATION METHOD USED		C1295	Arranz,S., Saura-Calixto,F., Shaha,S., Kroon,P.A.	Journal of Agricultural and Food Chemistry	57	2009	High Contents of Nonextractable Polyphenols in Fruits Suggest That Polyphenol Contents of Plant Foods Have Been Underestimated
51511	Nectarine	Prunus persica (L.) Batsch var. nucipersica (Suckow) C.K.Schneid.	Hydrolysable polyphenols (HPP)	658	mg/kg FW	High-performance liquid chromatography	Fruit or berry	WHOLE		FRUIT OR FRUIT PRODUCT	NOT HEAT-TREATED	RAW MATERIAL	NO TREATMENT APPLIED	NO PRESERVATION METHOD USED		C1295	Arranz,S., Saura-Calixto,F., Shaha,S., Kroon,P.A.	Journal of Agricultural and Food Chemistry	57	2009	High Contents of Nonextractable Polyphenols in Fruits Suggest That Polyphenol Contents of Plant Foods Have Been Underestimated
51649	Nectarine	Prunus persica (L.) Batsch var. nucipersica (Suckow) C.K.Schneid.	Non-extractable proanthocyanidins (NEPA)	28	mg/kg FW	High-performance liquid chromatography	Fruit or berry	WHOLE		FRUIT OR FRUIT PRODUCT	NOT HEAT-TREATED	RAW MATERIAL	NO TREATMENT APPLIED	NO PRESERVATION METHOD USED		C1298	Hellström,J.K., Törrönen,A.R., Mattila,P.H.	Journal of Agricultural and Food Chemistry	57	2009	Proanthocyanidins in Common Food Products of Plant Origin
51514	Nectarine	Prunus persica (L.) Batsch var. nucipersica (Suckow) C.K.Schneid.	Non-extractable proanthocyanidins (NEPA)	458	mg/kg FW	Spectrophotometry	Fruit or berry	WHOLE		FRUIT OR FRUIT PRODUCT	NOT HEAT-TREATED	RAW MATERIAL	NO TREATMENT APPLIED	NO PRESERVATION METHOD USED		C1295	Arranz,S., Saura-Calixto,F., Shaha,S., Kroon,P.A.	Journal of Agricultural and Food Chemistry	57	2009	High Contents of Nonextractable Polyphenols in Fruits Suggest That Polyphenol Contents of Plant Foods Have Been Underestimated
51567	Nectarine	Prunus persica (L.) Batsch var. nucipersica (Suckow) C.K.Schneid.	Non-extractable proanthocyanidins (NEPA)	4010	mg/kg DW	Spectrophotometry	Fruit or berry, peel present	WHOLE		FRUIT OR FRUIT PRODUCT	NOT HEAT-TREATED	RAW MATERIAL	NO TREATMENT APPLIED	NO PRESERVATION METHOD USED		C1297	Pérez-Jiménez,J., Arranz,S., Saura-Calixto,F.	Food Research International	42	2009	Proanthocyanidin content in foods is largely underestimated in the literature data: An approach to quantification of the missing proanthocyanidins
51367	Onion	Allium cepa L.	Extractable polyphenols (EPP)	4554	mg/kg DW	Folin-Ciocalteu assay	Bulb	WHOLE		VEGETABLE (EXCLUDING POTATO)	NOT HEAT-TREATED	RAW MATERIAL	NO TREATMENT APPLIED	NO PRESERVATION METHOD USED		C1290	Pérez-Jiménez,J., Saura-Calixto,F.	Food Research International	74	2015	Macromolecular antioxidants or non-extractable polyphenols in fruit and vegetables: Intake in four European countries
51416	Onion	Allium cepa L.	Extractable polyphenols (EPP)	76800	µmole/kg DW	ORAC assay	Bulb	WHOLE		VEGETABLE (EXCLUDING POTATO)	NOT HEAT-TREATED	RAW MATERIAL	NO TREATMENT APPLIED	NO PRESERVATION METHOD USED		C1290	Pérez-Jiménez,J., Saura-Calixto,F.	Food Research International	74	2015	Macromolecular antioxidants or non-extractable polyphenols in fruit and vegetables: Intake in four European countries
51388	Onion	Allium cepa L.	Hydrolysable polyphenols (HPP)	2438	mg/kg DW	Folin-Ciocalteu assay	Bulb	WHOLE		VEGETABLE (EXCLUDING POTATO)	NOT HEAT-TREATED	RAW MATERIAL	NO TREATMENT APPLIED	NO PRESERVATION METHOD USED		C1290	Pérez-Jiménez,J., Saura-Calixto,F.	Food Research International	74	2015	Macromolecular antioxidants or non-extractable polyphenols in fruit and vegetables: Intake in four European countries
51446	Onion	Allium cepa L.	Hydrolysable polyphenols (HPP)	9500	µmole/kg DW	ORAC assay	Bulb	WHOLE		VEGETABLE (EXCLUDING POTATO)	NOT HEAT-TREATED	RAW MATERIAL	NO TREATMENT APPLIED	NO PRESERVATION METHOD USED		C1290	Pérez-Jiménez,J., Saura-Calixto,F.	Food Research International	74	2015	Macromolecular antioxidants or non-extractable polyphenols in fruit and vegetables: Intake in four European countries
51368	Orange, sweet	Citrus sinensis (L.) Osbeck	Extractable polyphenols (EPP)	7864	mg/kg DW	Folin-Ciocalteu assay	Fruit or berry	WHOLE		FRUIT OR FRUIT PRODUCT	NOT HEAT-TREATED	RAW MATERIAL	NO TREATMENT APPLIED	NO PRESERVATION METHOD USED		C1290	Pérez-Jiménez,J., Saura-Calixto,F.	Food Research International	74	2015	Macromolecular antioxidants or non-extractable polyphenols in fruit and vegetables: Intake in four European countries
51415	Orange, sweet	Citrus sinensis (L.) Osbeck	Extractable polyphenols (EPP)	99900	µmole/kg DW	ORAC assay	Fruit or berry	WHOLE		FRUIT OR FRUIT PRODUCT	NOT HEAT-TREATED	RAW MATERIAL	NO TREATMENT APPLIED	NO PRESERVATION METHOD USED		C1290	Pérez-Jiménez,J., Saura-Calixto,F.	Food Research International	74	2015	Macromolecular antioxidants or non-extractable polyphenols in fruit and vegetables: Intake in four European countries
51387	Orange, sweet	Citrus sinensis (L.) Osbeck	Hydrolysable polyphenols (HPP)	11247	mg/kg DW	Folin-Ciocalteu assay	Fruit or berry	WHOLE		FRUIT OR FRUIT PRODUCT	NOT HEAT-TREATED	RAW MATERIAL	NO TREATMENT APPLIED	NO PRESERVATION METHOD USED		C1290	Pérez-Jiménez,J., Saura-Calixto,F.	Food Research International	74	2015	Macromolecular antioxidants or non-extractable polyphenols in fruit and vegetables: Intake in four European countries
51441	Orange, sweet	Citrus sinensis (L.) Osbeck	Hydrolysable polyphenols (HPP)	109100	µmole/kg DW	ORAC assay	Fruit or berry	WHOLE		FRUIT OR FRUIT PRODUCT	NOT HEAT-TREATED	RAW MATERIAL	NO TREATMENT APPLIED	NO PRESERVATION METHOD USED		C1290	Pérez-Jiménez,J., Saura-Calixto,F.	Food Research International	74	2015	Macromolecular antioxidants or non-extractable polyphenols in fruit and vegetables: Intake in four European countries
52090	Papaya	Carica papaya L.	Extractable polyphenols (EPP)	931.8	mg/kg FW	DPPH assay	Fruit or berry	WHOLE	Pulp	FRUIT OR FRUIT PRODUCT	NOT HEAT-TREATED	RAW MATERIAL	NO TREATMENT APPLIED	NO PRESERVATION METHOD USED		C1314	VELDERRAIN-RODRÍGUEZ,G., QUIRÓS-SAUCEDA,A.,MERCADO-MERCADO,G., AYALA-ZAVALA,J.,ASTIAZARÁN-GARCÍA,H.,ROBLES-SÁNCHEZ,R.,WALL-MEDRANO,A.,SAYAGO-AYERDI,S.,GONZÁLEZ-AGUILAR,G.	Food Science and Technology	36	2016	Effect of dietary fiber on the bioaccessibility of phenolic compounds of mango, papaya and pineapple fruits by an in vitro digestion model
52495	Papaya	Carica papaya L.	Extractable polyphenols (EPP)	2960	mg/kg DW	Folin-Ciocalteu assay	Fruit or berry	WHOLE		FRUIT OR FRUIT PRODUCT	NOT HEAT-TREATED	RAW MATERIAL	NO TREATMENT APPLIED	NO PRESERVATION METHOD USED		C1331	Olivas-Aguirre,F.J., González-Aguilar,G.A., Velderrain-Rodríguez,G.R., Torres-Moreno,H., Robles-Zepeda,R.E., Vázquez-Flores,A.A., Rosa,L.A. and Wall-Medrano,A.	International Journal of Food Science & Technology	57	2017	Radical scavenging and anti-proliferative capacity of three freeze-dried tropical fruits
52089	Papaya	Carica papaya L.	Hydrolysable polyphenols (HPP)	1189.8	mg/kg FW	DPPH assay	Fruit or berry	WHOLE	Pulp	FRUIT OR FRUIT PRODUCT	NOT HEAT-TREATED	RAW MATERIAL	NO TREATMENT APPLIED	NO PRESERVATION METHOD USED		C1314	VELDERRAIN-RODRÍGUEZ,G., QUIRÓS-SAUCEDA,A.,MERCADO-MERCADO,G., AYALA-ZAVALA,J.,ASTIAZARÁN-GARCÍA,H.,ROBLES-SÁNCHEZ,R.,WALL-MEDRANO,A.,SAYAGO-AYERDI,S.,GONZÁLEZ-AGUILAR,G.	Food Science and Technology	36	2016	Effect of dietary fiber on the bioaccessibility of phenolic compounds of mango, papaya and pineapple fruits by an in vitro digestion model
51507	Peach	Prunus persica (L.) Batsch var. persica	Extractable polyphenols (EPP)	259.1	mg/kg FW	High-performance liquid chromatography	Fruit or berry	WHOLE		FRUIT OR FRUIT PRODUCT	NOT HEAT-TREATED	RAW MATERIAL	NO TREATMENT APPLIED	NO PRESERVATION METHOD USED		C1295	Arranz,S., Saura-Calixto,F., Shaha,S., Kroon,P.A.	Journal of Agricultural and Food Chemistry	57	2009	High Contents of Nonextractable Polyphenols in Fruits Suggest That Polyphenol Contents of Plant Foods Have Been Underestimated
51369	Peach	Prunus persica (L.) Batsch var. persica	Extractable polyphenols (EPP)	7413	mg/kg DW	Folin-Ciocalteu assay	Fruit or berry	WHOLE		FRUIT OR FRUIT PRODUCT	NOT HEAT-TREATED	RAW MATERIAL	NO TREATMENT APPLIED	NO PRESERVATION METHOD USED		C1290	Pérez-Jiménez,J., Saura-Calixto,F.	Food Research International	74	2015	Macromolecular antioxidants or non-extractable polyphenols in fruit and vegetables: Intake in four European countries
51422	Peach	Prunus persica (L.) Batsch var. persica	Extractable polyphenols (EPP)	34900	µmole/kg DW	ORAC assay	Fruit or berry	WHOLE		FRUIT OR FRUIT PRODUCT	NOT HEAT-TREATED	RAW MATERIAL	NO TREATMENT APPLIED	NO PRESERVATION METHOD USED		C1290	Pérez-Jiménez,J., Saura-Calixto,F.	Food Research International	74	2015	Macromolecular antioxidants or non-extractable polyphenols in fruit and vegetables: Intake in four European countries
52120	Peach	Prunus persica (L.) Batsch var. persica	Extractable polyphenols (EPP)	83600	mg/kg DW	High-performance liquid chromatography	Fruit or berry	WHOLE	NOTE THIS IS THE BY PRODUCT OF JUICE PRODUCTION including peel and remnants of pulp	FRUIT OR FRUIT PRODUCT	NOT HEAT-TREATED	RAW MATERIAL	TREATMENT APPLIED NOT KNOWN	NO PRESERVATION METHOD USED		C1308	Amaya-Cruz, D.M., Rodriguez-Gonzalez, S., Perez-Ramirez, I.F., Loarca-Pina, G., Amaya-Llano, S., Gallegos-Corona, M.A., Reynoso-Camacho, R.	Journal of Functional Foods	17	2015	Juice by-products as a source of dietary fibre and antioxidants and their effect on hepatic steatosis
51509	Peach	Prunus persica (L.) Batsch var. persica	Hydrolysable polyphenols (HPP)	528	mg/kg FW	High-performance liquid chromatography	Fruit or berry	WHOLE		FRUIT OR FRUIT PRODUCT	NOT HEAT-TREATED	RAW MATERIAL	NO TREATMENT APPLIED	NO PRESERVATION METHOD USED		C1295	Arranz,S., Saura-Calixto,F., Shaha,S., Kroon,P.A.	Journal of Agricultural and Food Chemistry	57	2009	High Contents of Nonextractable Polyphenols in Fruits Suggest That Polyphenol Contents of Plant Foods Have Been Underestimated
52123	Peach	Prunus persica (L.) Batsch var. persica	Hydrolysable polyphenols (HPP)	1640	mg/kg DW	High-performance liquid chromatography	Fruit or berry	WHOLE	NOTE THIS IS THE BY PRODUCT OF JUICE PRODUCTION including peel and remnants of pulp	FRUIT OR FRUIT PRODUCT	NOT HEAT-TREATED	RAW MATERIAL	TREATMENT APPLIED NOT KNOWN	NO PRESERVATION METHOD USED		C1308	Amaya-Cruz, D.M., Rodriguez-Gonzalez, S., Perez-Ramirez, I.F., Loarca-Pina, G., Amaya-Llano, S., Gallegos-Corona, M.A., Reynoso-Camacho, R.	Journal of Functional Foods	17	2015	Juice by-products as a source of dietary fibre and antioxidants and their effect on hepatic steatosis
51394	Peach	Prunus persica (L.) Batsch var. persica	Hydrolysable polyphenols (HPP)	4034	mg/kg DW	Folin-Ciocalteu assay	Fruit or berry	WHOLE		FRUIT OR FRUIT PRODUCT	NOT HEAT-TREATED	RAW MATERIAL	NO TREATMENT APPLIED	NO PRESERVATION METHOD USED		C1290	Pérez-Jiménez,J., Saura-Calixto,F.	Food Research International	74	2015	Macromolecular antioxidants or non-extractable polyphenols in fruit and vegetables: Intake in four European countries
51448	Peach	Prunus persica (L.) Batsch var. persica	Hydrolysable polyphenols (HPP)	47000	µmole/kg DW	ORAC assay	Fruit or berry	WHOLE		FRUIT OR FRUIT PRODUCT	NOT HEAT-TREATED	RAW MATERIAL	NO TREATMENT APPLIED	NO PRESERVATION METHOD USED		C1290	Pérez-Jiménez,J., Saura-Calixto,F.	Food Research International	74	2015	Macromolecular antioxidants or non-extractable polyphenols in fruit and vegetables: Intake in four European countries
51650	Peach	Prunus persica (L.) Batsch var. persica	Non-extractable proanthocyanidins (NEPA)	56	mg/kg FW	High-performance liquid chromatography	Fruit or berry	WHOLE		FRUIT OR FRUIT PRODUCT	NOT HEAT-TREATED	RAW MATERIAL	NO TREATMENT APPLIED	NO PRESERVATION METHOD USED		C1298	Hellström,J.K., Törrönen,A.R., Mattila,P.H.	Journal of Agricultural and Food Chemistry	57	2009	Proanthocyanidins in Common Food Products of Plant Origin
51512	Peach	Prunus persica (L.) Batsch var. persica	Non-extractable proanthocyanidins (NEPA)	591	mg/kg FW	Spectrophotometry	Fruit or berry	WHOLE		FRUIT OR FRUIT PRODUCT	NOT HEAT-TREATED	RAW MATERIAL	NO TREATMENT APPLIED	NO PRESERVATION METHOD USED		C1295	Arranz,S., Saura-Calixto,F., Shaha,S., Kroon,P.A.	Journal of Agricultural and Food Chemistry	57	2009	High Contents of Nonextractable Polyphenols in Fruits Suggest That Polyphenol Contents of Plant Foods Have Been Underestimated
51403	Peach	Prunus persica (L.) Batsch var. persica	Non-extractable proanthocyanidins (NEPA)	1485	mg/kg DW	Spectrophotometry	Fruit or berry	WHOLE		FRUIT OR FRUIT PRODUCT	NOT HEAT-TREATED	RAW MATERIAL	NO TREATMENT APPLIED	NO PRESERVATION METHOD USED		C1290	Pérez-Jiménez,J., Saura-Calixto,F.	Food Research International	74	2015	Macromolecular antioxidants or non-extractable polyphenols in fruit and vegetables: Intake in four European countries
52378	Peach	Prunus persica (L.) Batsch var. persica	Non-extractable polyphenols (NEPP)	232.4	mg/kg FW	Folin-Ciocalteu assay	Fruit or berry	WHOLE	Early-maturing cultivar Flesh only	FRUIT OR FRUIT PRODUCT	NOT HEAT-TREATED	RAW MATERIAL	NO TREATMENT APPLIED	NO PRESERVATION METHOD USED		C1330	Liu,H., Jiang,W., Cao,J. and Ma,L.	Journal of Food Processing and Preservation	42	2018	Evaluation of antioxidant properties of extractable and nonextractable polyphenols in peel and flesh tissue of different peach varieties
52371	Peach	Prunus persica (L.) Batsch var. persica	Extractable polyphenols (EPP)	791.4	mg/kg FW	Folin-Ciocalteu assay	Fruit or berry, peel only	WHOLE	Early-maturing cultivar Peel only	FRUIT OR FRUIT PRODUCT	NOT HEAT-TREATED	RAW MATERIAL	NO TREATMENT APPLIED	NO PRESERVATION METHOD USED		C1330	Liu,H., Jiang,W., Cao,J. and Ma,L.	Journal of Food Processing and Preservation	42	2018	Evaluation of antioxidant properties of extractable and nonextractable polyphenols in peel and flesh tissue of different peach varieties
52373	Peach	Prunus persica (L.) Batsch var. persica	Extractable polyphenols (EPP)	1014.5	mg/kg FW	Folin-Ciocalteu assay	Fruit or berry, peel only	WHOLE	Early-maturing cultivar Peel only	FRUIT OR FRUIT PRODUCT	NOT HEAT-TREATED	RAW MATERIAL	NO TREATMENT APPLIED	NO PRESERVATION METHOD USED		C1330	Liu,H., Jiang,W., Cao,J. and Ma,L.	Journal of Food Processing and Preservation	42	2018	Evaluation of antioxidant properties of extractable and nonextractable polyphenols in peel and flesh tissue of different peach varieties
52375	Peach	Prunus persica (L.) Batsch var. persica	Extractable polyphenols (EPP)	1248.8	mg/kg FW	Folin-Ciocalteu assay	Fruit or berry, peel only	WHOLE	Late-maturing cultivar Peel only	FRUIT OR FRUIT PRODUCT	NOT HEAT-TREATED	RAW MATERIAL	NO TREATMENT APPLIED	NO PRESERVATION METHOD USED		C1330	Liu,H., Jiang,W., Cao,J. and Ma,L.	Journal of Food Processing and Preservation	42	2018	Evaluation of antioxidant properties of extractable and nonextractable polyphenols in peel and flesh tissue of different peach varieties
52377	Peach	Prunus persica (L.) Batsch var. persica	Extractable polyphenols (EPP)	1671	mg/kg FW	Folin-Ciocalteu assay	Fruit or berry, peel only	WHOLE	Late-maturing cultivar Peel only	FRUIT OR FRUIT PRODUCT	NOT HEAT-TREATED	RAW MATERIAL	NO TREATMENT APPLIED	NO PRESERVATION METHOD USED		C1330	Liu,H., Jiang,W., Cao,J. and Ma,L.	Journal of Food Processing and Preservation	42	2018	Evaluation of antioxidant properties of extractable and nonextractable polyphenols in peel and flesh tissue of different peach varieties
52383	Peach	Prunus persica (L.) Batsch var. persica	Non-extractable polyphenols (NEPP)	529.3	mg/kg FW	Folin-Ciocalteu assay	Fruit or berry, peel only	WHOLE	Late-maturing cultivar Peel only	FRUIT OR FRUIT PRODUCT	NOT HEAT-TREATED	RAW MATERIAL	NO TREATMENT APPLIED	NO PRESERVATION METHOD USED		C1330	Liu,H., Jiang,W., Cao,J. and Ma,L.	Journal of Food Processing and Preservation	42	2018	Evaluation of antioxidant properties of extractable and nonextractable polyphenols in peel and flesh tissue of different peach varieties
52381	Peach	Prunus persica (L.) Batsch var. persica	Non-extractable polyphenols (NEPP)	563.4	mg/kg FW	Folin-Ciocalteu assay	Fruit or berry, peel only	WHOLE	Early-maturing cultivar Peel only	FRUIT OR FRUIT PRODUCT	NOT HEAT-TREATED	RAW MATERIAL	NO TREATMENT APPLIED	NO PRESERVATION METHOD USED		C1330	Liu,H., Jiang,W., Cao,J. and Ma,L.	Journal of Food Processing and Preservation	42	2018	Evaluation of antioxidant properties of extractable and nonextractable polyphenols in peel and flesh tissue of different peach varieties
52379	Peach	Prunus persica (L.) Batsch var. persica	Non-extractable polyphenols (NEPP)	572.2	mg/kg FW	Folin-Ciocalteu assay	Fruit or berry, peel only	WHOLE	Early-maturing cultivar Peel only	FRUIT OR FRUIT PRODUCT	NOT HEAT-TREATED	RAW MATERIAL	NO TREATMENT APPLIED	NO PRESERVATION METHOD USED		C1330	Liu,H., Jiang,W., Cao,J. and Ma,L.	Journal of Food Processing and Preservation	42	2018	Evaluation of antioxidant properties of extractable and nonextractable polyphenols in peel and flesh tissue of different peach varieties
52386	Peach	Prunus persica (L.) Batsch var. persica	Non-extractable polyphenols (NEPP)	840.2	mg/kg FW	Folin-Ciocalteu assay	Fruit or berry, peel only	WHOLE	Late-maturing cultivar Peel only	FRUIT OR FRUIT PRODUCT	NOT HEAT-TREATED	RAW MATERIAL	NO TREATMENT APPLIED	NO PRESERVATION METHOD USED		C1330	Liu,H., Jiang,W., Cao,J. and Ma,L.	Journal of Food Processing and Preservation	42	2018	Evaluation of antioxidant properties of extractable and nonextractable polyphenols in peel and flesh tissue of different peach varieties
51571	Peach	Prunus persica (L.) Batsch var. persica	Non-extractable proanthocyanidins (NEPA)	6760	mg/kg DW	Spectrophotometry	Fruit or berry, peel present	WHOLE	Yellow peach	FRUIT OR FRUIT PRODUCT	NOT HEAT-TREATED	RAW MATERIAL	NO TREATMENT APPLIED	NO PRESERVATION METHOD USED		C1297	Pérez-Jiménez,J., Arranz,S., Saura-Calixto,F.	Food Research International	42	2009	Proanthocyanidin content in foods is largely underestimated in the literature data: An approach to quantification of the missing proanthocyanidins
52370	Peach	Prunus persica (L.) Batsch var. persica	Extractable polyphenols (EPP)	252.8	mg/kg FW	Folin-Ciocalteu assay	Fruit or berry, peel removed, core, pit or seed removed	WHOLE	Early-maturing cultivar Flesh only	FRUIT OR FRUIT PRODUCT	NOT HEAT-TREATED	RAW MATERIAL	NO TREATMENT APPLIED	NO PRESERVATION METHOD USED		C1330	Liu,H., Jiang,W., Cao,J. and Ma,L.	Journal of Food Processing and Preservation	42	2018	Evaluation of antioxidant properties of extractable and nonextractable polyphenols in peel and flesh tissue of different peach varieties
52372	Peach	Prunus persica (L.) Batsch var. persica	Extractable polyphenols (EPP)	369.5	mg/kg FW	Folin-Ciocalteu assay	Fruit or berry, peel removed, core, pit or seed removed	WHOLE	Early-maturing cultivar Flesh only	FRUIT OR FRUIT PRODUCT	NOT HEAT-TREATED	RAW MATERIAL	NO TREATMENT APPLIED	NO PRESERVATION METHOD USED		C1330	Liu,H., Jiang,W., Cao,J. and Ma,L.	Journal of Food Processing and Preservation	42	2018	Evaluation of antioxidant properties of extractable and nonextractable polyphenols in peel and flesh tissue of different peach varieties
52374	Peach	Prunus persica (L.) Batsch var. persica	Extractable polyphenols (EPP)	701.9	mg/kg FW	Folin-Ciocalteu assay	Fruit or berry, peel removed, core, pit or seed removed	WHOLE	Late-maturing cultivar Flesh only	FRUIT OR FRUIT PRODUCT	NOT HEAT-TREATED	RAW MATERIAL	NO TREATMENT APPLIED	NO PRESERVATION METHOD USED		C1330	Liu,H., Jiang,W., Cao,J. and Ma,L.	Journal of Food Processing and Preservation	42	2018	Evaluation of antioxidant properties of extractable and nonextractable polyphenols in peel and flesh tissue of different peach varieties
52376	Peach	Prunus persica (L.) Batsch var. persica	Extractable polyphenols (EPP)	866.4	mg/kg FW	Folin-Ciocalteu assay	Fruit or berry, peel removed, core, pit or seed removed	WHOLE	Late-maturing cultivar Flesh only	FRUIT OR FRUIT PRODUCT	NOT HEAT-TREATED	RAW MATERIAL	NO TREATMENT APPLIED	NO PRESERVATION METHOD USED		C1330	Liu,H., Jiang,W., Cao,J. and Ma,L.	Journal of Food Processing and Preservation	42	2018	Evaluation of antioxidant properties of extractable and nonextractable polyphenols in peel and flesh tissue of different peach varieties
52380	Peach	Prunus persica (L.) Batsch var. persica	Non-extractable polyphenols (NEPP)	185.3	mg/kg FW	Folin-Ciocalteu assay	Fruit or berry, peel removed, core, pit or seed removed	WHOLE	Early-maturing cultivar Flesh only	FRUIT OR FRUIT PRODUCT	NOT HEAT-TREATED	RAW MATERIAL	NO TREATMENT APPLIED	NO PRESERVATION METHOD USED		C1330	Liu,H., Jiang,W., Cao,J. and Ma,L.	Journal of Food Processing and Preservation	42	2018	Evaluation of antioxidant properties of extractable and nonextractable polyphenols in peel and flesh tissue of different peach varieties
52382	Peach	Prunus persica (L.) Batsch var. persica	Non-extractable polyphenols (NEPP)	266.6	mg/kg FW	Folin-Ciocalteu assay	Fruit or berry, peel removed, core, pit or seed removed	WHOLE	Late-maturing cultivar Flesh only	FRUIT OR FRUIT PRODUCT	NOT HEAT-TREATED	RAW MATERIAL	NO TREATMENT APPLIED	NO PRESERVATION METHOD USED		C1330	Liu,H., Jiang,W., Cao,J. and Ma,L.	Journal of Food Processing and Preservation	42	2018	Evaluation of antioxidant properties of extractable and nonextractable polyphenols in peel and flesh tissue of different peach varieties
52385	Peach	Prunus persica (L.) Batsch var. persica	Non-extractable polyphenols (NEPP)	310.8	mg/kg FW	Folin-Ciocalteu assay	Fruit or berry, peel removed, core, pit or seed removed	WHOLE	Late-maturing cultivar Flesh only	FRUIT OR FRUIT PRODUCT	NOT HEAT-TREATED	RAW MATERIAL	NO TREATMENT APPLIED	NO PRESERVATION METHOD USED		C1330	Liu,H., Jiang,W., Cao,J. and Ma,L.	Journal of Food Processing and Preservation	42	2018	Evaluation of antioxidant properties of extractable and nonextractable polyphenols in peel and flesh tissue of different peach varieties
51657	Peanut	Arachis hypogaea L.	Non-extractable proanthocyanidins (NEPA)	530	mg/kg FW	High-performance liquid chromatography	Seed or kernel	WHOLE		NUT, SEED OR KERNEL	NOT HEAT-TREATED	RAW MATERIAL	NO TREATMENT APPLIED	NO PRESERVATION METHOD USED		C1298	Hellström,J.K., Törrönen,A.R., Mattila,P.H.	Journal of Agricultural and Food Chemistry	57	2009	Proanthocyanidins in Common Food Products of Plant Origin
51370	Pear	Pyrus communis L.	Extractable polyphenols (EPP)	3758	mg/kg DW	Folin-Ciocalteu assay	Fruit or berry	WHOLE		FRUIT OR FRUIT PRODUCT	NOT HEAT-TREATED	RAW MATERIAL	NO TREATMENT APPLIED	NO PRESERVATION METHOD USED		C1290	Pérez-Jiménez,J., Saura-Calixto,F.	Food Research International	74	2015	Macromolecular antioxidants or non-extractable polyphenols in fruit and vegetables: Intake in four European countries
51421	Pear	Pyrus communis L.	Extractable polyphenols (EPP)	27700	µmole/kg DW	ORAC assay	Fruit or berry	WHOLE		FRUIT OR FRUIT PRODUCT	NOT HEAT-TREATED	RAW MATERIAL	NO TREATMENT APPLIED	NO PRESERVATION METHOD USED		C1290	Pérez-Jiménez,J., Saura-Calixto,F.	Food Research International	74	2015	Macromolecular antioxidants or non-extractable polyphenols in fruit and vegetables: Intake in four European countries
51393	Pear	Pyrus communis L.	Hydrolysable polyphenols (HPP)	14271	mg/kg DW	Folin-Ciocalteu assay	Fruit or berry	WHOLE		FRUIT OR FRUIT PRODUCT	NOT HEAT-TREATED	RAW MATERIAL	NO TREATMENT APPLIED	NO PRESERVATION METHOD USED		C1290	Pérez-Jiménez,J., Saura-Calixto,F.	Food Research International	74	2015	Macromolecular antioxidants or non-extractable polyphenols in fruit and vegetables: Intake in four European countries
51447	Pear	Pyrus communis L.	Hydrolysable polyphenols (HPP)	33700	µmole/kg DW	ORAC assay	Fruit or berry	WHOLE		FRUIT OR FRUIT PRODUCT	NOT HEAT-TREATED	RAW MATERIAL	NO TREATMENT APPLIED	NO PRESERVATION METHOD USED		C1290	Pérez-Jiménez,J., Saura-Calixto,F.	Food Research International	74	2015	Macromolecular antioxidants or non-extractable polyphenols in fruit and vegetables: Intake in four European countries
51651	Pear	Pyrus communis L.	Non-extractable proanthocyanidins (NEPA)	98	mg/kg FW	High-performance liquid chromatography	Fruit or berry	WHOLE		FRUIT OR FRUIT PRODUCT	NOT HEAT-TREATED	RAW MATERIAL	NO TREATMENT APPLIED	NO PRESERVATION METHOD USED		C1298	Hellström,J.K., Törrönen,A.R., Mattila,P.H.	Journal of Agricultural and Food Chemistry	57	2009	Proanthocyanidins in Common Food Products of Plant Origin
51404	Pear	Pyrus communis L.	Non-extractable proanthocyanidins (NEPA)	4158	mg/kg DW	Spectrophotometry	Fruit or berry	WHOLE		FRUIT OR FRUIT PRODUCT	NOT HEAT-TREATED	RAW MATERIAL	NO TREATMENT APPLIED	NO PRESERVATION METHOD USED		C1290	Pérez-Jiménez,J., Saura-Calixto,F.	Food Research International	74	2015	Macromolecular antioxidants or non-extractable polyphenols in fruit and vegetables: Intake in four European countries
51568	Pear	Pyrus communis L.	Non-extractable proanthocyanidins (NEPA)	700	mg/kg DW	Spectrophotometry	Fruit or berry, peel present	WHOLE		FRUIT OR FRUIT PRODUCT	NOT HEAT-TREATED	RAW MATERIAL	NO TREATMENT APPLIED	NO PRESERVATION METHOD USED		C1297	Pérez-Jiménez,J., Arranz,S., Saura-Calixto,F.	Food Research International	42	2009	Proanthocyanidin content in foods is largely underestimated in the literature data: An approach to quantification of the missing proanthocyanidins
51371	Pepper, bell	Capsicum annuum L. var. annuum	Extractable polyphenols (EPP)	18344	mg/kg DW	Folin-Ciocalteu assay	Fruit or berry	WHOLE	Red pepper	VEGETABLE (EXCLUDING POTATO)	NOT HEAT-TREATED	RAW MATERIAL	NO TREATMENT APPLIED	NO PRESERVATION METHOD USED		C1290	Pérez-Jiménez,J., Saura-Calixto,F.	Food Research International	74	2015	Macromolecular antioxidants or non-extractable polyphenols in fruit and vegetables: Intake in four European countries
51420	Pepper, bell	Capsicum annuum L. var. annuum	Extractable polyphenols (EPP)	129900	µmole/kg DW	ORAC assay	Fruit or berry	WHOLE	Red pepper	VEGETABLE (EXCLUDING POTATO)	NOT HEAT-TREATED	RAW MATERIAL	NO TREATMENT APPLIED	NO PRESERVATION METHOD USED		C1290	Pérez-Jiménez,J., Saura-Calixto,F.	Food Research International	74	2015	Macromolecular antioxidants or non-extractable polyphenols in fruit and vegetables: Intake in four European countries
51392	Pepper, bell	Capsicum annuum L. var. annuum	Hydrolysable polyphenols (HPP)	2529	mg/kg DW	Folin-Ciocalteu assay	Fruit or berry	WHOLE	Red pepper	VEGETABLE (EXCLUDING POTATO)	NOT HEAT-TREATED	RAW MATERIAL	NO TREATMENT APPLIED	NO PRESERVATION METHOD USED		C1290	Pérez-Jiménez,J., Saura-Calixto,F.	Food Research International	74	2015	Macromolecular antioxidants or non-extractable polyphenols in fruit and vegetables: Intake in four European countries
51445	Pepper, bell	Capsicum annuum L. var. annuum	Hydrolysable polyphenols (HPP)	10600	µmole/kg DW	ORAC assay	Fruit or berry	WHOLE	Red pepper	VEGETABLE (EXCLUDING POTATO)	NOT HEAT-TREATED	RAW MATERIAL	NO TREATMENT APPLIED	NO PRESERVATION METHOD USED		C1290	Pérez-Jiménez,J., Saura-Calixto,F.	Food Research International	74	2015	Macromolecular antioxidants or non-extractable polyphenols in fruit and vegetables: Intake in four European countries
52085	Pineapple	Ananas comosus (L.) Merr.	Extractable polyphenols (EPP)	568.3	mg/kg FW	DPPH assay	Fruit or berry	WHOLE	Pulp	FRUIT OR FRUIT PRODUCT	NOT HEAT-TREATED	RAW MATERIAL	NO TREATMENT APPLIED	NO PRESERVATION METHOD USED		C1314	VELDERRAIN-RODRÍGUEZ,G., QUIRÓS-SAUCEDA,A.,MERCADO-MERCADO,G., AYALA-ZAVALA,J.,ASTIAZARÁN-GARCÍA,H.,ROBLES-SÁNCHEZ,R.,WALL-MEDRANO,A.,SAYAGO-AYERDI,S.,GONZÁLEZ-AGUILAR,G.	Food Science and Technology	36	2016	Effect of dietary fiber on the bioaccessibility of phenolic compounds of mango, papaya and pineapple fruits by an in vitro digestion model
52496	Pineapple	Ananas comosus (L.) Merr.	Extractable polyphenols (EPP)	2700	mg/kg DW	Folin-Ciocalteu assay	Fruit or berry	WHOLE		FRUIT OR FRUIT PRODUCT	NOT HEAT-TREATED	RAW MATERIAL	NO TREATMENT APPLIED	NO PRESERVATION METHOD USED		C1331	Olivas-Aguirre,F.J., González-Aguilar,G.A., Velderrain-Rodríguez,G.R., Torres-Moreno,H., Robles-Zepeda,R.E., Vázquez-Flores,A.A., Rosa,L.A. and Wall-Medrano,A.	International Journal of Food Science & Technology	57	2017	Radical scavenging and anti-proliferative capacity of three freeze-dried tropical fruits
52086	Pineapple	Ananas comosus (L.) Merr.	Hydrolysable polyphenols (HPP)	507.9	mg/kg FW	DPPH assay	Fruit or berry	WHOLE	Pulp	FRUIT OR FRUIT PRODUCT	NOT HEAT-TREATED	RAW MATERIAL	NO TREATMENT APPLIED	NO PRESERVATION METHOD USED		C1314	VELDERRAIN-RODRÍGUEZ,G., QUIRÓS-SAUCEDA,A.,MERCADO-MERCADO,G., AYALA-ZAVALA,J.,ASTIAZARÁN-GARCÍA,H.,ROBLES-SÁNCHEZ,R.,WALL-MEDRANO,A.,SAYAGO-AYERDI,S.,GONZÁLEZ-AGUILAR,G.	Food Science and Technology	36	2016	Effect of dietary fiber on the bioaccessibility of phenolic compounds of mango, papaya and pineapple fruits by an in vitro digestion model
51460	Plum	Prunus domestica L. ssp. domestica	Extractable proanthocyanidins (EPA)	2000	µmole/kg FW	ABTS assay	Fruit or berry	WHOLE		FRUIT OR FRUIT PRODUCT	NOT HEAT-TREATED	RAW MATERIAL	NO TREATMENT APPLIED	NO PRESERVATION METHOD USED		C1288	Kristl,J., Slekovec,M., Tojnko,S., Unuk,T.	Food Chemistry	125	2011	Extractable antioxidants and non-extractable phenolics in the total antioxidant activity of selected plum cultivars (Prunus domestica L.): Evolution during on-tree ripening
51454	Plum	Prunus domestica L. ssp. domestica	Extractable polyphenols (EPP)	7200	µmole/kg FW	ABTS assay	Fruit or berry	WHOLE		FRUIT OR FRUIT PRODUCT	NOT HEAT-TREATED	RAW MATERIAL	NO TREATMENT APPLIED	NO PRESERVATION METHOD USED		C1288	Kristl,J., Slekovec,M., Tojnko,S., Unuk,T.	Food Chemistry	125	2011	Extractable antioxidants and non-extractable phenolics in the total antioxidant activity of selected plum cultivars (Prunus domestica L.): Evolution during on-tree ripening
51463	Plum	Prunus domestica L. ssp. domestica	Extractable polyphenols (EPP)	9200	µmole/kg FW	ABTS assay	Fruit or berry	WHOLE		FRUIT OR FRUIT PRODUCT	NOT HEAT-TREATED	RAW MATERIAL	NO TREATMENT APPLIED	NO PRESERVATION METHOD USED		C1288	Kristl,J., Slekovec,M., Tojnko,S., Unuk,T.	Food Chemistry	125	2011	Extractable antioxidants and non-extractable phenolics in the total antioxidant activity of selected plum cultivars (Prunus domestica L.): Evolution during on-tree ripening
51459	Plum	Prunus domestica L. ssp. domestica	Extractable polyphenols (EPP)	13900	µmole/kg FW	ABTS assay	Fruit or berry	WHOLE		FRUIT OR FRUIT PRODUCT	NOT HEAT-TREATED	RAW MATERIAL	NO TREATMENT APPLIED	NO PRESERVATION METHOD USED		C1288	Kristl,J., Slekovec,M., Tojnko,S., Unuk,T.	Food Chemistry	125	2011	Extractable antioxidants and non-extractable phenolics in the total antioxidant activity of selected plum cultivars (Prunus domestica L.): Evolution during on-tree ripening
51455	Plum	Prunus domestica L. ssp. domestica	Hydrolysable polyphenols (HPP)	39600	µmole/kg FW	ABTS assay	Fruit or berry	WHOLE		FRUIT OR FRUIT PRODUCT	NOT HEAT-TREATED	RAW MATERIAL	NO TREATMENT APPLIED	NO PRESERVATION METHOD USED		C1288	Kristl,J., Slekovec,M., Tojnko,S., Unuk,T.	Food Chemistry	125	2011	Extractable antioxidants and non-extractable phenolics in the total antioxidant activity of selected plum cultivars (Prunus domestica L.): Evolution during on-tree ripening
51461	Plum	Prunus domestica L. ssp. domestica	Hydrolysable polyphenols (HPP)	43400	µmole/kg FW	ABTS assay	Fruit or berry	WHOLE		FRUIT OR FRUIT PRODUCT	NOT HEAT-TREATED	RAW MATERIAL	NO TREATMENT APPLIED	NO PRESERVATION METHOD USED		C1288	Kristl,J., Slekovec,M., Tojnko,S., Unuk,T.	Food Chemistry	125	2011	Extractable antioxidants and non-extractable phenolics in the total antioxidant activity of selected plum cultivars (Prunus domestica L.): Evolution during on-tree ripening
51458	Plum	Prunus domestica L. ssp. domestica	Hydrolysable polyphenols (HPP)	45300	µmole/kg FW	ABTS assay	Fruit or berry	WHOLE		FRUIT OR FRUIT PRODUCT	NOT HEAT-TREATED	RAW MATERIAL	NO TREATMENT APPLIED	NO PRESERVATION METHOD USED		C1288	Kristl,J., Slekovec,M., Tojnko,S., Unuk,T.	Food Chemistry	125	2011	Extractable antioxidants and non-extractable phenolics in the total antioxidant activity of selected plum cultivars (Prunus domestica L.): Evolution during on-tree ripening
51464	Plum	Prunus domestica L. ssp. domestica	Hydrolysable polyphenols (HPP)	55200	µmole/kg FW	ABTS assay	Fruit or berry	WHOLE		FRUIT OR FRUIT PRODUCT	NOT HEAT-TREATED	RAW MATERIAL	NO TREATMENT APPLIED	NO PRESERVATION METHOD USED		C1288	Kristl,J., Slekovec,M., Tojnko,S., Unuk,T.	Food Chemistry	125	2011	Extractable antioxidants and non-extractable phenolics in the total antioxidant activity of selected plum cultivars (Prunus domestica L.): Evolution during on-tree ripening
51647	Plum	Prunus domestica L. ssp. domestica	Non-extractable proanthocyanidins (NEPA)	33	mg/kg FW	High-performance liquid chromatography	Fruit or berry	WHOLE		FRUIT OR FRUIT PRODUCT	NOT HEAT-TREATED	RAW MATERIAL	NO TREATMENT APPLIED	NO PRESERVATION METHOD USED		C1298	Hellström,J.K., Törrönen,A.R., Mattila,P.H.	Journal of Agricultural and Food Chemistry	57	2009	Proanthocyanidins in Common Food Products of Plant Origin
51456	Plum	Prunus domestica L. ssp. domestica	Non-extractable proanthocyanidins (NEPA)	22600	µmole/kg FW	ABTS assay	Fruit or berry	WHOLE		FRUIT OR FRUIT PRODUCT	NOT HEAT-TREATED	RAW MATERIAL	NO TREATMENT APPLIED	NO PRESERVATION METHOD USED		C1288	Kristl,J., Slekovec,M., Tojnko,S., Unuk,T.	Food Chemistry	125	2011	Extractable antioxidants and non-extractable phenolics in the total antioxidant activity of selected plum cultivars (Prunus domestica L.): Evolution during on-tree ripening
51462	Plum	Prunus domestica L. ssp. domestica	Non-extractable proanthocyanidins (NEPA)	24700	µmole/kg FW	ABTS assay	Fruit or berry	WHOLE		FRUIT OR FRUIT PRODUCT	NOT HEAT-TREATED	RAW MATERIAL	NO TREATMENT APPLIED	NO PRESERVATION METHOD USED		C1288	Kristl,J., Slekovec,M., Tojnko,S., Unuk,T.	Food Chemistry	125	2011	Extractable antioxidants and non-extractable phenolics in the total antioxidant activity of selected plum cultivars (Prunus domestica L.): Evolution during on-tree ripening
51457	Plum	Prunus domestica L. ssp. domestica	Non-extractable proanthocyanidins (NEPA)	25700	µmole/kg FW	ABTS assay	Fruit or berry	WHOLE		FRUIT OR FRUIT PRODUCT	NOT HEAT-TREATED	RAW MATERIAL	NO TREATMENT APPLIED	NO PRESERVATION METHOD USED		C1288	Kristl,J., Slekovec,M., Tojnko,S., Unuk,T.	Food Chemistry	125	2011	Extractable antioxidants and non-extractable phenolics in the total antioxidant activity of selected plum cultivars (Prunus domestica L.): Evolution during on-tree ripening
51465	Plum	Prunus domestica L. ssp. domestica	Non-extractable proanthocyanidins (NEPA)	55400	µmole/kg FW	ABTS assay	Fruit or berry	WHOLE		FRUIT OR FRUIT PRODUCT	NOT HEAT-TREATED	RAW MATERIAL	NO TREATMENT APPLIED	NO PRESERVATION METHOD USED		C1288	Kristl,J., Slekovec,M., Tojnko,S., Unuk,T.	Food Chemistry	125	2011	Extractable antioxidants and non-extractable phenolics in the total antioxidant activity of selected plum cultivars (Prunus domestica L.): Evolution during on-tree ripening
52490	Prickly pear	Opuntia ficus-indica (L.) Mill. var. ficus-indica	Extractable polyphenols (EPP)	104300	µmole/kg DW	Trolox Equivalent Antioxidant Capacity (TEAC)	Seed or kernel	WHOLE	Orange-red flesh fruit seeds	FRUIT OR FRUIT PRODUCT	NOT HEAT-TREATED	RAW MATERIAL	NO TREATMENT APPLIED	NO PRESERVATION METHOD USED		C1332	Zakynthinos,G. and Varzakas,T.	Nutriton and Food Science	4	2016	Lipid Profile And Antioxidant Properties of Selected Pear Cactus (Opuntia Ficus-Indica) Ecotypes From Southern Greece
52436	Prickly pear	Opuntia ficus-indica (L.) Mill. var. ficus-indica	Extractable polyphenols (EPP)	113300	µmole/kg DW	Trolox Equivalent Antioxidant Capacity (TEAC)	Seed or kernel	WHOLE	Red flesh fruit seeds	FRUIT OR FRUIT PRODUCT	NOT HEAT-TREATED	RAW MATERIAL	NO TREATMENT APPLIED	NO PRESERVATION METHOD USED		C1332	Zakynthinos,G. and Varzakas,T.	Nutriton and Food Science	4	2016	Lipid Profile And Antioxidant Properties of Selected Pear Cactus (Opuntia Ficus-Indica) Ecotypes From Southern Greece
52489	Prickly pear	Opuntia ficus-indica (L.) Mill. var. ficus-indica	Extractable polyphenols (EPP)	125300	µmole/kg DW	Trolox Equivalent Antioxidant Capacity (TEAC)	Seed or kernel	WHOLE	Purple flesh fruit seeds	FRUIT OR FRUIT PRODUCT	NOT HEAT-TREATED	RAW MATERIAL	NO TREATMENT APPLIED	NO PRESERVATION METHOD USED		C1332	Zakynthinos,G. and Varzakas,T.	Nutriton and Food Science	4	2016	Lipid Profile And Antioxidant Properties of Selected Pear Cactus (Opuntia Ficus-Indica) Ecotypes From Southern Greece
52491	Prickly pear	Opuntia ficus-indica (L.) Mill. var. ficus-indica	Non-extractable polyphenols (NEPP)	69500	µmole/kg DW	Spectrophotometry	Seed or kernel	WHOLE	Red flesh fruit seeds	FRUIT OR FRUIT PRODUCT	NOT HEAT-TREATED	RAW MATERIAL	NO TREATMENT APPLIED	NO PRESERVATION METHOD USED		C1332	Zakynthinos,G. and Varzakas,T.	Nutriton and Food Science	4	2016	Lipid Profile And Antioxidant Properties of Selected Pear Cactus (Opuntia Ficus-Indica) Ecotypes From Southern Greece
52493	Prickly pear	Opuntia ficus-indica (L.) Mill. var. ficus-indica	Non-extractable polyphenols (NEPP)	76500	µmole/kg DW	Spectrophotometry	Seed or kernel	WHOLE	Orange-red flesh fruit seeds	FRUIT OR FRUIT PRODUCT	NOT HEAT-TREATED	RAW MATERIAL	NO TREATMENT APPLIED	NO PRESERVATION METHOD USED		C1332	Zakynthinos,G. and Varzakas,T.	Nutriton and Food Science	4	2016	Lipid Profile And Antioxidant Properties of Selected Pear Cactus (Opuntia Ficus-Indica) Ecotypes From Southern Greece
52492	Prickly pear	Opuntia ficus-indica (L.) Mill. var. ficus-indica	Non-extractable polyphenols (NEPP)	85600	µmole/kg DW	Spectrophotometry	Seed or kernel	WHOLE	Purple flesh fruit seeds	FRUIT OR FRUIT PRODUCT	NOT HEAT-TREATED	RAW MATERIAL	NO TREATMENT APPLIED	NO PRESERVATION METHOD USED		C1332	Zakynthinos,G. and Varzakas,T.	Nutriton and Food Science	4	2016	Lipid Profile And Antioxidant Properties of Selected Pear Cactus (Opuntia Ficus-Indica) Ecotypes From Southern Greece
51653	Raspberry	Rubus ideaus L.	Non-extractable proanthocyanidins (NEPA)	46	mg/kg FW	High-performance liquid chromatography	Fruit or berry	WHOLE		FRUIT OR FRUIT PRODUCT	NOT HEAT-TREATED	RAW MATERIAL	NO TREATMENT APPLIED	NO PRESERVATION METHOD USED		C1298	Hellström,J.K., Törrönen,A.R., Mattila,P.H.	Journal of Agricultural and Food Chemistry	57	2009	Proanthocyanidins in Common Food Products of Plant Origin
51580	Red currant, garden currant	Ribes rubrum L.	Non-extractable proanthocyanidins (NEPA)	868	mg/kg FW	High-performance liquid chromatography	Fruit or berry	WHOLE		FRUIT OR FRUIT PRODUCT	NOT HEAT-TREATED	RAW MATERIAL	NO TREATMENT APPLIED	NO PRESERVATION METHOD USED		C1298	Hellström,J.K., Törrönen,A.R., Mattila,P.H.	Journal of Agricultural and Food Chemistry	57	2009	Proanthocyanidins in Common Food Products of Plant Origin
51656	Rhubarb	Rheum × cultorum Thorsrud & Reisaeter	Non-extractable proanthocyanidins (NEPA)	274	mg/kg FW	High-performance liquid chromatography	Stem or stalk (without leaves)	WHOLE		VEGETABLE (EXCLUDING POTATO)	NOT HEAT-TREATED	RAW MATERIAL	NO TREATMENT APPLIED	NO PRESERVATION METHOD USED		C1298	Hellström,J.K., Törrönen,A.R., Mattila,P.H.	Journal of Agricultural and Food Chemistry	57	2009	Proanthocyanidins in Common Food Products of Plant Origin
51639	Rowan	Sorbus aucuparia L.	Non-extractable proanthocyanidins (NEPA)	1580	mg/kg FW	High-performance liquid chromatography	Fruit or berry	WHOLE	sweet rowanberry	FRUIT OR FRUIT PRODUCT	NOT HEAT-TREATED	RAW MATERIAL	NO TREATMENT APPLIED	NO PRESERVATION METHOD USED		C1298	Hellström,J.K., Törrönen,A.R., Mattila,P.H.	Journal of Agricultural and Food Chemistry	57	2009	Proanthocyanidins in Common Food Products of Plant Origin
51573	sea buckthorn	Hippophae rhamnoides L.	Non-extractable proanthocyanidins (NEPA)	1990	mg/kg FW	High-performance liquid chromatography	Fruit or berry	WHOLE		FRUIT OR FRUIT PRODUCT	NOT HEAT-TREATED	RAW MATERIAL	NO TREATMENT APPLIED	NO PRESERVATION METHOD USED		C1298	Hellström,J.K., Törrönen,A.R., Mattila,P.H.	Journal of Agricultural and Food Chemistry	57	2009	Proanthocyanidins in Common Food Products of Plant Origin
52433	Sorghum	Sorghum bicolor (L.) Moench	Extractable polyphenols (EPP)	1714	mg/kg DW	Folin-Ciocalteu assay	Seed or kernel	WHOLE	White grain sorghum	RICE OR OTHER GRAIN	NOT HEAT-TREATED	RAW MATERIAL	NO TREATMENT APPLIED	NO PRESERVATION METHOD USED		C1327	Shen,S., Huang,R., Li,C., Wu,W., Chen,H., Shi,J., Chen,S. and Ye,X.	Molecules	23	2018	Phenolic Compositions and Antioxidant Activities Differ Significantly among Sorghum Grains with Different Applications
52421	Sorghum	Sorghum bicolor (L.) Moench	Extractable polyphenols (EPP)	1938.3	mg/kg DW	Folin-Ciocalteu assay	Seed or kernel	WHOLE	Brewing sorghum variety	RICE OR OTHER GRAIN	NOT HEAT-TREATED	RAW MATERIAL	NO TREATMENT APPLIED	NO PRESERVATION METHOD USED		C1327	Shen,S., Huang,R., Li,C., Wu,W., Chen,H., Shi,J., Chen,S. and Ye,X.	Molecules	23	2018	Phenolic Compositions and Antioxidant Activities Differ Significantly among Sorghum Grains with Different Applications
52430	Sorghum	Sorghum bicolor (L.) Moench	Extractable polyphenols (EPP)	2516.8	mg/kg DW	Folin-Ciocalteu assay	Seed or kernel	WHOLE	Black grain sorghum	RICE OR OTHER GRAIN	NOT HEAT-TREATED	RAW MATERIAL	NO TREATMENT APPLIED	NO PRESERVATION METHOD USED		C1327	Shen,S., Huang,R., Li,C., Wu,W., Chen,H., Shi,J., Chen,S. and Ye,X.	Molecules	23	2018	Phenolic Compositions and Antioxidant Activities Differ Significantly among Sorghum Grains with Different Applications
52424	Sorghum	Sorghum bicolor (L.) Moench	Extractable polyphenols (EPP)	4028.1	mg/kg DW	Folin-Ciocalteu assay	Seed or kernel	WHOLE	Sorghum for seed reserving	RICE OR OTHER GRAIN	NOT HEAT-TREATED	RAW MATERIAL	NO TREATMENT APPLIED	NO PRESERVATION METHOD USED		C1327	Shen,S., Huang,R., Li,C., Wu,W., Chen,H., Shi,J., Chen,S. and Ye,X.	Molecules	23	2018	Phenolic Compositions and Antioxidant Activities Differ Significantly among Sorghum Grains with Different Applications
52427	Sorghum	Sorghum bicolor (L.) Moench	Extractable polyphenols (EPP)	4539.2	mg/kg DW	Folin-Ciocalteu assay	Seed or kernel	WHOLE	Sorghum for seed reserving	RICE OR OTHER GRAIN	NOT HEAT-TREATED	RAW MATERIAL	NO TREATMENT APPLIED	NO PRESERVATION METHOD USED		C1327	Shen,S., Huang,R., Li,C., Wu,W., Chen,H., Shi,J., Chen,S. and Ye,X.	Molecules	23	2018	Phenolic Compositions and Antioxidant Activities Differ Significantly among Sorghum Grains with Different Applications
52415	Sorghum	Sorghum bicolor (L.) Moench	Extractable polyphenols (EPP)	4737.4	mg/kg DW	Folin-Ciocalteu assay	Seed or kernel	WHOLE	Brewing sorghum variety	RICE OR OTHER GRAIN	NOT HEAT-TREATED	RAW MATERIAL	NO TREATMENT APPLIED	NO PRESERVATION METHOD USED		C1327	Shen,S., Huang,R., Li,C., Wu,W., Chen,H., Shi,J., Chen,S. and Ye,X.	Molecules	23	2018	Phenolic Compositions and Antioxidant Activities Differ Significantly among Sorghum Grains with Different Applications
52418	Sorghum	Sorghum bicolor (L.) Moench	Extractable polyphenols (EPP)	9406	mg/kg DW	Folin-Ciocalteu assay	Seed or kernel	WHOLE	Brewing sorghum variety	RICE OR OTHER GRAIN	NOT HEAT-TREATED	RAW MATERIAL	NO TREATMENT APPLIED	NO PRESERVATION METHOD USED		C1327	Shen,S., Huang,R., Li,C., Wu,W., Chen,H., Shi,J., Chen,S. and Ye,X.	Molecules	23	2018	Phenolic Compositions and Antioxidant Activities Differ Significantly among Sorghum Grains with Different Applications
52412	Sorghum	Sorghum bicolor (L.) Moench	Extractable polyphenols (EPP)	10518.4	mg/kg DW	Folin-Ciocalteu assay	Seed or kernel	WHOLE	Brewing sorghum variety	RICE OR OTHER GRAIN	NOT HEAT-TREATED	RAW MATERIAL	NO TREATMENT APPLIED	NO PRESERVATION METHOD USED		C1327	Shen,S., Huang,R., Li,C., Wu,W., Chen,H., Shi,J., Chen,S. and Ye,X.	Molecules	23	2018	Phenolic Compositions and Antioxidant Activities Differ Significantly among Sorghum Grains with Different Applications
52434	Sorghum	Sorghum bicolor (L.) Moench	Non-extractable polyphenols (NEPP)	33.7	mg/kg DW	Folin-Ciocalteu assay	Seed or kernel	WHOLE	White grain sorghum	RICE OR OTHER GRAIN	NOT HEAT-TREATED	RAW MATERIAL	NO TREATMENT APPLIED	NO PRESERVATION METHOD USED		C1327	Shen,S., Huang,R., Li,C., Wu,W., Chen,H., Shi,J., Chen,S. and Ye,X.	Molecules	23	2018	Phenolic Compositions and Antioxidant Activities Differ Significantly among Sorghum Grains with Different Applications
52422	Sorghum	Sorghum bicolor (L.) Moench	Non-extractable polyphenols (NEPP)	1310.3	mg/kg DW	Folin-Ciocalteu assay	Seed or kernel	WHOLE	Brewing sorghum variety	RICE OR OTHER GRAIN	NOT HEAT-TREATED	RAW MATERIAL	NO TREATMENT APPLIED	NO PRESERVATION METHOD USED		C1327	Shen,S., Huang,R., Li,C., Wu,W., Chen,H., Shi,J., Chen,S. and Ye,X.	Molecules	23	2018	Phenolic Compositions and Antioxidant Activities Differ Significantly among Sorghum Grains with Different Applications
52425	Sorghum	Sorghum bicolor (L.) Moench	Non-extractable polyphenols (NEPP)	1567	mg/kg DW	Folin-Ciocalteu assay	Seed or kernel	WHOLE	Sorghum for seed reserving	RICE OR OTHER GRAIN	NOT HEAT-TREATED	RAW MATERIAL	NO TREATMENT APPLIED	NO PRESERVATION METHOD USED		C1327	Shen,S., Huang,R., Li,C., Wu,W., Chen,H., Shi,J., Chen,S. and Ye,X.	Molecules	23	2018	Phenolic Compositions and Antioxidant Activities Differ Significantly among Sorghum Grains with Different Applications
52431	Sorghum	Sorghum bicolor (L.) Moench	Non-extractable polyphenols (NEPP)	1612.9	mg/kg DW	Folin-Ciocalteu assay	Seed or kernel	WHOLE	Black grain sorghum	RICE OR OTHER GRAIN	NOT HEAT-TREATED	RAW MATERIAL	NO TREATMENT APPLIED	NO PRESERVATION METHOD USED		C1327	Shen,S., Huang,R., Li,C., Wu,W., Chen,H., Shi,J., Chen,S. and Ye,X.	Molecules	23	2018	Phenolic Compositions and Antioxidant Activities Differ Significantly among Sorghum Grains with Different Applications
52419	Sorghum	Sorghum bicolor (L.) Moench	Non-extractable polyphenols (NEPP)	1736.3	mg/kg DW	Folin-Ciocalteu assay	Seed or kernel	WHOLE	Brewing sorghum variety	RICE OR OTHER GRAIN	NOT HEAT-TREATED	RAW MATERIAL	NO TREATMENT APPLIED	NO PRESERVATION METHOD USED		C1327	Shen,S., Huang,R., Li,C., Wu,W., Chen,H., Shi,J., Chen,S. and Ye,X.	Molecules	23	2018	Phenolic Compositions and Antioxidant Activities Differ Significantly among Sorghum Grains with Different Applications
52428	Sorghum	Sorghum bicolor (L.) Moench	Non-extractable polyphenols (NEPP)	1867.5	mg/kg DW	Folin-Ciocalteu assay	Seed or kernel	WHOLE	Sorghum for seed reserving	RICE OR OTHER GRAIN	NOT HEAT-TREATED	RAW MATERIAL	NO TREATMENT APPLIED	NO PRESERVATION METHOD USED		C1327	Shen,S., Huang,R., Li,C., Wu,W., Chen,H., Shi,J., Chen,S. and Ye,X.	Molecules	23	2018	Phenolic Compositions and Antioxidant Activities Differ Significantly among Sorghum Grains with Different Applications
52413	Sorghum	Sorghum bicolor (L.) Moench	Non-extractable polyphenols (NEPP)	1869.9	mg/kg DW	Folin-Ciocalteu assay	Seed or kernel	WHOLE	Brewing sorghum variety	RICE OR OTHER GRAIN	NOT HEAT-TREATED	RAW MATERIAL	NO TREATMENT APPLIED	NO PRESERVATION METHOD USED		C1327	Shen,S., Huang,R., Li,C., Wu,W., Chen,H., Shi,J., Chen,S. and Ye,X.	Molecules	23	2018	Phenolic Compositions and Antioxidant Activities Differ Significantly among Sorghum Grains with Different Applications
52416	Sorghum	Sorghum bicolor (L.) Moench	Non-extractable polyphenols (NEPP)	1945.5	mg/kg DW	Folin-Ciocalteu assay	Seed or kernel	WHOLE	Brewing sorghum variety	RICE OR OTHER GRAIN	NOT HEAT-TREATED	RAW MATERIAL	NO TREATMENT APPLIED	NO PRESERVATION METHOD USED		C1327	Shen,S., Huang,R., Li,C., Wu,W., Chen,H., Shi,J., Chen,S. and Ye,X.	Molecules	23	2018	Phenolic Compositions and Antioxidant Activities Differ Significantly among Sorghum Grains with Different Applications
51732	Soya	Glycine max (L.) Merr.	Extractable polyphenols (EPP)	1133.8	mg/kg DW	Folin-Ciocalteu assay	Seed or kernel	LIQUID	Soy beverage: water, soy beans, sugar, alga and vanilla	BEVERAGE (NON-MILK)	EXTENT OF HEAT TREATMENT NOT KNOWN	COOKING METHOD NOT KNOWN	TREATMENT APPLIED NOT KNOWN	PRESERVATION METHOD NOT KNOWN	The total content of antioxidant could not be exact, as the beverages contains other compounds that could affect the total amount	C1299	Durazzo,A., Gabrielli,P., Manzi,P.	Antioxidants	4	2015	Qualitative Study of Functional Groups and Antioxidant Properties of Soy-Based Beverages Compared to Cow Milk
51727	Soya	Glycine max (L.) Merr.	Extractable polyphenols (EPP)	1972.2	mg/kg DW	Folin-Ciocalteu assay	Seed or kernel	LIQUID	Soy beverage: water, soy beans, sugar, salt flavor satabilizer, vitamins, acidity regulator, and tricalcium phospate	BEVERAGE (NON-MILK)	EXTENT OF HEAT TREATMENT NOT KNOWN	COOKING METHOD NOT KNOWN	TREATMENT APPLIED NOT KNOWN	PRESERVATION METHOD NOT KNOWN	The total content of antioxidant could not be exact, as the beverages contains other compounds that could affect the total amount	C1299	Durazzo,A., Gabrielli,P., Manzi,P.	Antioxidants	4	2015	Qualitative Study of Functional Groups and Antioxidant Properties of Soy-Based Beverages Compared to Cow Milk
51722	Soya	Glycine max (L.) Merr.	Extractable polyphenols (EPP)	2251.8	mg/kg DW	Folin-Ciocalteu assay	Seed or kernel	LIQUID	Soy beverage: Tonyu, sugar cane, calcium carbonate, vanilla flavor, salt and stabilizers	BEVERAGE (NON-MILK)	EXTENT OF HEAT TREATMENT NOT KNOWN	RAW MATERIAL	TREATMENT APPLIED NOT KNOWN	PRESERVATION METHOD NOT KNOWN	The total content of antioxidant could not be exact, as the beverages contains other compounds that could affect the total amount	C1299	Durazzo,A., Gabrielli,P., Manzi,P.	Antioxidants	4	2015	Qualitative Study of Functional Groups and Antioxidant Properties of Soy-Based Beverages Compared to Cow Milk
51730	Soya	Glycine max (L.) Merr.	Extractable polyphenols (EPP)	8540	µmole/kg DW	FRAP assay	Seed or kernel	LIQUID	Soy beverage: water, soy beans, sugar, alga and vanilla	BEVERAGE (NON-MILK)	EXTENT OF HEAT TREATMENT NOT KNOWN	COOKING METHOD NOT KNOWN	TREATMENT APPLIED NOT KNOWN	PRESERVATION METHOD NOT KNOWN	The total content of antioxidant could not be exact, as the beverages contains other compounds that could affect the total amount	C1299	Durazzo,A., Gabrielli,P., Manzi,P.	Antioxidants	4	2015	Qualitative Study of Functional Groups and Antioxidant Properties of Soy-Based Beverages Compared to Cow Milk
51724	Soya	Glycine max (L.) Merr.	Extractable polyphenols (EPP)	12790	µmole/kg DW	FRAP assay	Seed or kernel	LIQUID	Soy beverage: Tonyu, sugar cane, calcium carbonate, vanilla flavor, salt and stabilizers	BEVERAGE (NON-MILK)	EXTENT OF HEAT TREATMENT NOT KNOWN	COOKING METHOD NOT KNOWN	TREATMENT APPLIED NOT KNOWN	PRESERVATION METHOD NOT KNOWN	The total content of antioxidant could not be exact, as the beverages contains other compounds that could affect the total amount	C1299	Durazzo,A., Gabrielli,P., Manzi,P.	Antioxidants	4	2015	Qualitative Study of Functional Groups and Antioxidant Properties of Soy-Based Beverages Compared to Cow Milk
51725	Soya	Glycine max (L.) Merr.	Extractable polyphenols (EPP)	13490	µmole/kg DW	FRAP assay	Seed or kernel	LIQUID	Soy beverage: water, soy beans, sugar, salt flavor satabilizer, vitamins, acidity regulator, and tricalcium phospate	BEVERAGE (NON-MILK)	EXTENT OF HEAT TREATMENT NOT KNOWN	COOKING METHOD NOT KNOWN	TREATMENT APPLIED NOT KNOWN	PRESERVATION METHOD NOT KNOWN	The total content of antioxidant could not be exact, as the beverages contains other compounds that could affect the total amount	C1299	Durazzo,A., Gabrielli,P., Manzi,P.	Antioxidants	4	2015	Qualitative Study of Functional Groups and Antioxidant Properties of Soy-Based Beverages Compared to Cow Milk
51731	Soya	Glycine max (L.) Merr.	Extractable polyphenols (EPP)	13840	µmole/kg DW	FRAP assay	Seed or kernel	LIQUID	Soy beverage: water, soy beans, sugar, alga and vanilla	BEVERAGE (NON-MILK)	EXTENT OF HEAT TREATMENT NOT KNOWN	COOKING METHOD NOT KNOWN	TREATMENT APPLIED NOT KNOWN	PRESERVATION METHOD NOT KNOWN	The total content of antioxidant could not be exact, as the beverages contains other compounds that could affect the total amount	C1299	Durazzo,A., Gabrielli,P., Manzi,P.	Antioxidants	4	2015	Qualitative Study of Functional Groups and Antioxidant Properties of Soy-Based Beverages Compared to Cow Milk
51721	Soya	Glycine max (L.) Merr.	Extractable polyphenols (EPP)	16270	µmole/kg DW	FRAP assay	Seed or kernel	LIQUID	Soy beverage: Tonyu, sugar cane, calcium carbonate, vanilla flavor, salt and stabilizers	BEVERAGE (NON-MILK)	EXTENT OF HEAT TREATMENT NOT KNOWN	COOKING METHOD NOT KNOWN	TREATMENT APPLIED NOT KNOWN	PRESERVATION METHOD NOT KNOWN	The total content of antioxidant could not be exact, as the beverages contains other compounds that could affect the total amount	C1299	Durazzo,A., Gabrielli,P., Manzi,P.	Antioxidants	4	2015	Qualitative Study of Functional Groups and Antioxidant Properties of Soy-Based Beverages Compared to Cow Milk
51726	Soya	Glycine max (L.) Merr.	Extractable polyphenols (EPP)	18980	µmole/kg DW	FRAP assay	Seed or kernel	LIQUID	Soy beverage: water, soy beans, sugar, salt flavor satabilizer, vitamins, acidity regulator, and tricalcium phospate	BEVERAGE (NON-MILK)	EXTENT OF HEAT TREATMENT NOT KNOWN	COOKING METHOD NOT KNOWN	TREATMENT APPLIED NOT KNOWN	PRESERVATION METHOD NOT KNOWN	The total content of antioxidant could not be exact, as the beverages contains other compounds that could affect the total amount	C1299	Durazzo,A., Gabrielli,P., Manzi,P.	Antioxidants	4	2015	Qualitative Study of Functional Groups and Antioxidant Properties of Soy-Based Beverages Compared to Cow Milk
52515	Soya	Glycine max (L.) Merr.	Extractable polyphenols (EPP)	38040	mg/kg DW	Folin-Ciocalteu assay	Seed or kernel	WHOLE	Black soy bean Seed coat	PULSE OR PULSE PRODUCT	NOT HEAT-TREATED	RAW MATERIAL	NO TREATMENT APPLIED	NO PRESERVATION METHOD USED		C1333	Peng,H., Li,W., Li,H., Deng,Z. and Zhang,B.	Journal of Functional Foods	32	2017	Extractable and non-extractable bound phenolic compositions and their antioxidant properties in seed coat and cotyledon of black soybean (Glycinemax (L.) merr)
52521	Soya	Glycine max (L.) Merr.	Extractable polyphenols (EPP)	119730	µmole/kg DW	DPPH assay	Seed or kernel	WHOLE	Black soy bean Seed coat	PULSE OR PULSE PRODUCT	NOT HEAT-TREATED	RAW MATERIAL	NO TREATMENT APPLIED	NO PRESERVATION METHOD USED		C1333	Peng,H., Li,W., Li,H., Deng,Z. and Zhang,B.	Journal of Functional Foods	32	2017	Extractable and non-extractable bound phenolic compositions and their antioxidant properties in seed coat and cotyledon of black soybean (Glycinemax (L.) merr)
52527	Soya	Glycine max (L.) Merr.	Extractable polyphenols (EPP)	165860	µmole/kg DW	ABTS assay	Seed or kernel	WHOLE	Black soy bean Seed coat	PULSE OR PULSE PRODUCT	NOT HEAT-TREATED	RAW MATERIAL	NO TREATMENT APPLIED	NO PRESERVATION METHOD USED		C1333	Peng,H., Li,W., Li,H., Deng,Z. and Zhang,B.	Journal of Functional Foods	32	2017	Extractable and non-extractable bound phenolic compositions and their antioxidant properties in seed coat and cotyledon of black soybean (Glycinemax (L.) merr)
52533	Soya	Glycine max (L.) Merr.	Extractable polyphenols (EPP)	251840	µmole/kg DW	FRAP assay	Seed or kernel	WHOLE	Black soy bean Seed coat	PULSE OR PULSE PRODUCT	NOT HEAT-TREATED	RAW MATERIAL	NO TREATMENT APPLIED	NO PRESERVATION METHOD USED		C1333	Peng,H., Li,W., Li,H., Deng,Z. and Zhang,B.	Journal of Functional Foods	32	2017	Extractable and non-extractable bound phenolic compositions and their antioxidant properties in seed coat and cotyledon of black soybean (Glycinemax (L.) merr)
51733	Soya	Glycine max (L.) Merr.	Hydrolysable polyphenols (HPP)	13176	mg/kg DW	Folin-Ciocalteu assay	Seed or kernel	LIQUID	Soy beverage: water, soy beans, sugar, alga and vanilla	BEVERAGE (NON-MILK)	EXTENT OF HEAT TREATMENT NOT KNOWN	COOKING METHOD NOT KNOWN	TREATMENT APPLIED NOT KNOWN	PRESERVATION METHOD NOT KNOWN	The total content of antioxidant could not be exact, as the beverages contains other compounds that could affect the total amount	C1299	Durazzo,A., Gabrielli,P., Manzi,P.	Antioxidants	4	2015	Qualitative Study of Functional Groups and Antioxidant Properties of Soy-Based Beverages Compared to Cow Milk
51723	Soya	Glycine max (L.) Merr.	Hydrolysable polyphenols (HPP)	14687.7	mg/kg DW	Folin-Ciocalteu assay	Seed or kernel	LIQUID	Soy beverage: Tonyu, sugar cane, calcium carbonate, vanilla flavor, salt and stabilizers	BEVERAGE (NON-MILK)	EXTENT OF HEAT TREATMENT NOT KNOWN	COOKING METHOD NOT KNOWN	TREATMENT APPLIED NOT KNOWN	PRESERVATION METHOD NOT KNOWN	The total content of antioxidant could not be exact, as the beverages contains other compounds that could affect the total amount	C1299	Durazzo,A., Gabrielli,P., Manzi,P.	Antioxidants	4	2015	Qualitative Study of Functional Groups and Antioxidant Properties of Soy-Based Beverages Compared to Cow Milk
51728	Soya	Glycine max (L.) Merr.	Hydrolysable polyphenols (HPP)	25111.6	mg/kg DW	Folin-Ciocalteu assay	Seed or kernel	LIQUID	Soy beverage: water, soy beans, sugar, salt flavor satabilizer, vitamins, acidity regulator, and tricalcium phospate	BEVERAGE (NON-MILK)	EXTENT OF HEAT TREATMENT NOT KNOWN	COOKING METHOD NOT KNOWN	TREATMENT APPLIED NOT KNOWN	PRESERVATION METHOD NOT KNOWN	The total content of antioxidant could not be exact, as the beverages contains other compounds that could affect the total amount	C1299	Durazzo,A., Gabrielli,P., Manzi,P.	Antioxidants	4	2015	Qualitative Study of Functional Groups and Antioxidant Properties of Soy-Based Beverages Compared to Cow Milk
52517	Soya	Glycine max (L.) Merr.	Non-extractable polyphenols (NEPP)	8840	mg/kg DW	Folin-Ciocalteu assay	Seed or kernel	WHOLE	Black soy bean Seed coat	PULSE OR PULSE PRODUCT	NOT HEAT-TREATED	RAW MATERIAL	NO TREATMENT APPLIED	NO PRESERVATION METHOD USED	Non extractable-bound phenolic extract by alkali hydrolysis.	C1333	Peng,H., Li,W., Li,H., Deng,Z. and Zhang,B.	Journal of Functional Foods	32	2017	Extractable and non-extractable bound phenolic compositions and their antioxidant properties in seed coat and cotyledon of black soybean (Glycinemax (L.) merr)
52516	Soya	Glycine max (L.) Merr.	Non-extractable polyphenols (NEPP)	9330	mg/kg DW	Folin-Ciocalteu assay	Seed or kernel	WHOLE	Black soy bean Seed coat	PULSE OR PULSE PRODUCT	NOT HEAT-TREATED	RAW MATERIAL	NO TREATMENT APPLIED	NO PRESERVATION METHOD USED	Non extractable-bound phenolic extract by acid hydrolysis.	C1333	Peng,H., Li,W., Li,H., Deng,Z. and Zhang,B.	Journal of Functional Foods	32	2017	Extractable and non-extractable bound phenolic compositions and their antioxidant properties in seed coat and cotyledon of black soybean (Glycinemax (L.) merr)
52523	Soya	Glycine max (L.) Merr.	Non-extractable polyphenols (NEPP)	13960	µmole/kg DW	DPPH assay	Seed or kernel	WHOLE	Black soy bean Seed coat	PULSE OR PULSE PRODUCT	NOT HEAT-TREATED	RAW MATERIAL	NO TREATMENT APPLIED	NO PRESERVATION METHOD USED	Non extractable-bound phenolic extract by alkali hydrolysis.	C1333	Peng,H., Li,W., Li,H., Deng,Z. and Zhang,B.	Journal of Functional Foods	32	2017	Extractable and non-extractable bound phenolic compositions and their antioxidant properties in seed coat and cotyledon of black soybean (Glycinemax (L.) merr)
52529	Soya	Glycine max (L.) Merr.	Non-extractable polyphenols (NEPP)	13980	µmole/kg DW	ABTS assay	Seed or kernel	WHOLE	Black soy bean Seed coat	PULSE OR PULSE PRODUCT	NOT HEAT-TREATED	RAW MATERIAL	NO TREATMENT APPLIED	NO PRESERVATION METHOD USED	Non extractable-bound phenolic extract by alkali hydrolysis.	C1333	Peng,H., Li,W., Li,H., Deng,Z. and Zhang,B.	Journal of Functional Foods	32	2017	Extractable and non-extractable bound phenolic compositions and their antioxidant properties in seed coat and cotyledon of black soybean (Glycinemax (L.) merr)
52522	Soya	Glycine max (L.) Merr.	Non-extractable polyphenols (NEPP)	23530	µmole/kg DW	DPPH assay	Seed or kernel	WHOLE	Black soy bean Seed coat	PULSE OR PULSE PRODUCT	NOT HEAT-TREATED	RAW MATERIAL	NO TREATMENT APPLIED	NO PRESERVATION METHOD USED	Non extractable-bound phenolic extract by acid hydrolysis.	C1333	Peng,H., Li,W., Li,H., Deng,Z. and Zhang,B.	Journal of Functional Foods	32	2017	Extractable and non-extractable bound phenolic compositions and their antioxidant properties in seed coat and cotyledon of black soybean (Glycinemax (L.) merr)
52528	Soya	Glycine max (L.) Merr.	Non-extractable polyphenols (NEPP)	27160	µmole/kg DW	ABTS assay	Seed or kernel	WHOLE	Black soy bean Seed coat	PULSE OR PULSE PRODUCT	NOT HEAT-TREATED	RAW MATERIAL	NO TREATMENT APPLIED	NO PRESERVATION METHOD USED	Non extractable-bound phenolic extract by acid hydrolysis.	C1333	Peng,H., Li,W., Li,H., Deng,Z. and Zhang,B.	Journal of Functional Foods	32	2017	Extractable and non-extractable bound phenolic compositions and their antioxidant properties in seed coat and cotyledon of black soybean (Glycinemax (L.) merr)
52535	Soya	Glycine max (L.) Merr.	Non-extractable polyphenols (NEPP)	85290	µmole/kg DW	FRAP assay	Seed or kernel	WHOLE	Black soy bean Seed coat	PULSE OR PULSE PRODUCT	NOT HEAT-TREATED	RAW MATERIAL	NO TREATMENT APPLIED	NO PRESERVATION METHOD USED	Non extractable-bound phenolic extract by alkali hydrolysis.	C1333	Peng,H., Li,W., Li,H., Deng,Z. and Zhang,B.	Journal of Functional Foods	32	2017	Extractable and non-extractable bound phenolic compositions and their antioxidant properties in seed coat and cotyledon of black soybean (Glycinemax (L.) merr)
52534	Soya	Glycine max (L.) Merr.	Non-extractable polyphenols (NEPP)	133140	µmole/kg DW	FRAP assay	Seed or kernel	WHOLE	Black soy bean Seed coat	PULSE OR PULSE PRODUCT	NOT HEAT-TREATED	RAW MATERIAL	NO TREATMENT APPLIED	NO PRESERVATION METHOD USED	Non extractable-bound phenolic extract by acid hydrolysis.	C1333	Peng,H., Li,W., Li,H., Deng,Z. and Zhang,B.	Journal of Functional Foods	32	2017	Extractable and non-extractable bound phenolic compositions and their antioxidant properties in seed coat and cotyledon of black soybean (Glycinemax (L.) merr)
52530	Soya	Glycine max (L.) Merr.	Extractable polyphenols (EPP)	8430	µmole/kg DW	ABTS assay	Seed or kernel, skin removed	WHOLE	Black soy bean Cotyledon	PULSE OR PULSE PRODUCT	NOT HEAT-TREATED	RAW MATERIAL	NO TREATMENT APPLIED	NO PRESERVATION METHOD USED		C1333	Peng,H., Li,W., Li,H., Deng,Z. and Zhang,B.	Journal of Functional Foods	32	2017	Extractable and non-extractable bound phenolic compositions and their antioxidant properties in seed coat and cotyledon of black soybean (Glycinemax (L.) merr)
52518	Soya	Glycine max (L.) Merr.	Extractable polyphenols (EPP)	10600	mg/kg DW	Folin-Ciocalteu assay	Seed or kernel, skin removed	WHOLE	Black soy bean Cotyledon	PULSE OR PULSE PRODUCT	NOT HEAT-TREATED	RAW MATERIAL	NO TREATMENT APPLIED	NO PRESERVATION METHOD USED		C1333	Peng,H., Li,W., Li,H., Deng,Z. and Zhang,B.	Journal of Functional Foods	32	2017	Extractable and non-extractable bound phenolic compositions and their antioxidant properties in seed coat and cotyledon of black soybean (Glycinemax (L.) merr)
52536	Soya	Glycine max (L.) Merr.	Extractable polyphenols (EPP)	19940	µmole/kg DW	FRAP assay	Seed or kernel, skin removed	WHOLE	Black soy bean Cotyledon	PULSE OR PULSE PRODUCT	NOT HEAT-TREATED	RAW MATERIAL	NO TREATMENT APPLIED	NO PRESERVATION METHOD USED		C1333	Peng,H., Li,W., Li,H., Deng,Z. and Zhang,B.	Journal of Functional Foods	32	2017	Extractable and non-extractable bound phenolic compositions and their antioxidant properties in seed coat and cotyledon of black soybean (Glycinemax (L.) merr)
52524	Soya	Glycine max (L.) Merr.	Extractable polyphenols (EPP)	21930	µmole/kg DW	DPPH assay	Seed or kernel, skin removed	WHOLE	Black soy bean Cotyledon	PULSE OR PULSE PRODUCT	NOT HEAT-TREATED	RAW MATERIAL	NO TREATMENT APPLIED	NO PRESERVATION METHOD USED		C1333	Peng,H., Li,W., Li,H., Deng,Z. and Zhang,B.	Journal of Functional Foods	32	2017	Extractable and non-extractable bound phenolic compositions and their antioxidant properties in seed coat and cotyledon of black soybean (Glycinemax (L.) merr)
52525	Soya	Glycine max (L.) Merr.	Non-extractable polyphenols (NEPP)	1860	µmole/kg DW	DPPH assay	Seed or kernel, skin removed	WHOLE	Black soy bean Cotyledon	PULSE OR PULSE PRODUCT	NOT HEAT-TREATED	RAW MATERIAL	NO TREATMENT APPLIED	NO PRESERVATION METHOD USED	Non extractable-bound phenolic extract by alkali hydrolysis.	C1333	Peng,H., Li,W., Li,H., Deng,Z. and Zhang,B.	Journal of Functional Foods	32	2017	Extractable and non-extractable bound phenolic compositions and their antioxidant properties in seed coat and cotyledon of black soybean (Glycinemax (L.) merr)
52531	Soya	Glycine max (L.) Merr.	Non-extractable polyphenols (NEPP)	3280	µmole/kg DW	ABTS assay	Seed or kernel, skin removed	WHOLE	Black soy bean Cotyledon	PULSE OR PULSE PRODUCT	NOT HEAT-TREATED	RAW MATERIAL	NO TREATMENT APPLIED	NO PRESERVATION METHOD USED	Non extractable-bound phenolic extract by acid hydrolysis.	C1333	Peng,H., Li,W., Li,H., Deng,Z. and Zhang,B.	Journal of Functional Foods	32	2017	Extractable and non-extractable bound phenolic compositions and their antioxidant properties in seed coat and cotyledon of black soybean (Glycinemax (L.) merr)
52519	Soya	Glycine max (L.) Merr.	Non-extractable polyphenols (NEPP)	3670	mg/kg DW	Folin-Ciocalteu assay	Seed or kernel, skin removed	WHOLE	Black soy bean Cotyledon	PULSE OR PULSE PRODUCT	NOT HEAT-TREATED	RAW MATERIAL	NO TREATMENT APPLIED	NO PRESERVATION METHOD USED	Non extractable-bound phenolic extract by acid hydrolysis.	C1333	Peng,H., Li,W., Li,H., Deng,Z. and Zhang,B.	Journal of Functional Foods	32	2017	Extractable and non-extractable bound phenolic compositions and their antioxidant properties in seed coat and cotyledon of black soybean (Glycinemax (L.) merr)
52538	Soya	Glycine max (L.) Merr.	Non-extractable polyphenols (NEPP)	3910	µmole/kg DW	FRAP assay	Seed or kernel, skin removed	WHOLE	Black soy bean Cotyledon	PULSE OR PULSE PRODUCT	NOT HEAT-TREATED	RAW MATERIAL	NO TREATMENT APPLIED	NO PRESERVATION METHOD USED	Non extractable-bound phenolic extract by alkali hydrolysis.	C1333	Peng,H., Li,W., Li,H., Deng,Z. and Zhang,B.	Journal of Functional Foods	32	2017	Extractable and non-extractable bound phenolic compositions and their antioxidant properties in seed coat and cotyledon of black soybean (Glycinemax (L.) merr)
52520	Soya	Glycine max (L.) Merr.	Non-extractable polyphenols (NEPP)	4190	mg/kg DW	Folin-Ciocalteu assay	Seed or kernel, skin removed	WHOLE	Black soy bean Seed coat	PULSE OR PULSE PRODUCT	NOT HEAT-TREATED	RAW MATERIAL	NO TREATMENT APPLIED	NO PRESERVATION METHOD USED	Non extractable-bound phenolic extract by alkali hydrolysis.	C1333	Peng,H., Li,W., Li,H., Deng,Z. and Zhang,B.	Journal of Functional Foods	32	2017	Extractable and non-extractable bound phenolic compositions and their antioxidant properties in seed coat and cotyledon of black soybean (Glycinemax (L.) merr)
52532	Soya	Glycine max (L.) Merr.	Non-extractable polyphenols (NEPP)	5350	µmole/kg DW	ABTS assay	Seed or kernel, skin removed	WHOLE	Black soy bean Cotyledon	PULSE OR PULSE PRODUCT	NOT HEAT-TREATED	RAW MATERIAL	NO TREATMENT APPLIED	NO PRESERVATION METHOD USED	Non extractable-bound phenolic extract by alkali hydrolysis.	C1333	Peng,H., Li,W., Li,H., Deng,Z. and Zhang,B.	Journal of Functional Foods	32	2017	Extractable and non-extractable bound phenolic compositions and their antioxidant properties in seed coat and cotyledon of black soybean (Glycinemax (L.) merr)
52537	Soya	Glycine max (L.) Merr.	Non-extractable polyphenols (NEPP)	7860	µmole/kg DW	FRAP assay	Seed or kernel, skin removed	WHOLE	Black soy bean Cotyledon	PULSE OR PULSE PRODUCT	NOT HEAT-TREATED	RAW MATERIAL	NO TREATMENT APPLIED	NO PRESERVATION METHOD USED	Non extractable-bound phenolic extract by acid hydrolysis.	C1333	Peng,H., Li,W., Li,H., Deng,Z. and Zhang,B.	Journal of Functional Foods	32	2017	Extractable and non-extractable bound phenolic compositions and their antioxidant properties in seed coat and cotyledon of black soybean (Glycinemax (L.) merr)
52526	Soya	Glycine max (L.) Merr.	Non-extractable polyphenols (NEPP)	8790	µmole/kg DW	DPPH assay	Seed or kernel, skin removed	WHOLE	Black soy bean Cotyledon	PULSE OR PULSE PRODUCT	NOT HEAT-TREATED	RAW MATERIAL	NO TREATMENT APPLIED	NO PRESERVATION METHOD USED	Non extractable-bound phenolic extract by acid hydrolysis.	C1333	Peng,H., Li,W., Li,H., Deng,Z. and Zhang,B.	Journal of Functional Foods	32	2017	Extractable and non-extractable bound phenolic compositions and their antioxidant properties in seed coat and cotyledon of black soybean (Glycinemax (L.) merr)
51641	Strawberry	Fragaria × ananassa Duchesne	Non-extractable proanthocyanidins (NEPA)	15	mg/kg FW	High-performance liquid chromatography	Fruit or berry	WHOLE		FRUIT OR FRUIT PRODUCT	NOT HEAT-TREATED	RAW MATERIAL	NO TREATMENT APPLIED	NO PRESERVATION METHOD USED		C1298	Hellström,J.K., Törrönen,A.R., Mattila,P.H.	Journal of Agricultural and Food Chemistry	57	2009	Proanthocyanidins in Common Food Products of Plant Origin
51642	Strawberry	Fragaria × ananassa Duchesne	Non-extractable proanthocyanidins (NEPA)	24	mg/kg FW	High-performance liquid chromatography	Fruit or berry	WHOLE		FRUIT OR FRUIT PRODUCT	NOT HEAT-TREATED	RAW MATERIAL	NO TREATMENT APPLIED	NO PRESERVATION METHOD USED		C1298	Hellström,J.K., Törrönen,A.R., Mattila,P.H.	Journal of Agricultural and Food Chemistry	57	2009	Proanthocyanidins in Common Food Products of Plant Origin
51640	Strawberry	Fragaria × ananassa Duchesne	Non-extractable proanthocyanidins (NEPA)	41	mg/kg FW	High-performance liquid chromatography	Fruit or berry	WHOLE		FRUIT OR FRUIT PRODUCT	NOT HEAT-TREATED	RAW MATERIAL	NO TREATMENT APPLIED	NO PRESERVATION METHOD USED		C1298	Hellström,J.K., Törrönen,A.R., Mattila,P.H.	Journal of Agricultural and Food Chemistry	57	2009	Proanthocyanidins in Common Food Products of Plant Origin
51569	Strawberry	Fragaria × ananassa Duchesne	Non-extractable proanthocyanidins (NEPA)	2060	mg/kg DW	Spectrophotometry	Fruit or berry	WHOLE		FRUIT OR FRUIT PRODUCT	NOT HEAT-TREATED	RAW MATERIAL	NO TREATMENT APPLIED	NO PRESERVATION METHOD USED		C1297	Pérez-Jiménez,J., Arranz,S., Saura-Calixto,F.	Food Research International	42	2009	Proanthocyanidin content in foods is largely underestimated in the literature data: An approach to quantification of the missing proanthocyanidins
51886	Tea	Camellia sinensis (L.) Kuntze	Extractable polyphenols (EPP)	20.55	mg/l	DPPH assay	Leaf	WHOLE	Green tea	COFFEE, TEA, COCOA	NOT HEAT-TREATED	RAW MATERIAL	TREATMENT APPLIED NOT KNOWN	PRESERVATION METHOD NOT KNOWN		C1303	Yan,S., Shao,H., Zhou,Z., Wang,Q., Zhao,L., Yang,X.	Journal of Functional Foods	42	2018	Non-extractable polyphenols of green tea and their antioxidant, anti-α-glucosidase capacity, and release during in vitro digestion
51908	Tea	Camellia sinensis (L.) Kuntze	Extractable polyphenols (EPP)	23.63	mg/l	ABTS assay	Leaf	WHOLE	Green tea	COFFEE, TEA, COCOA	NOT HEAT-TREATED	RAW MATERIAL	TREATMENT APPLIED NOT KNOWN	PRESERVATION METHOD NOT KNOWN		C1303	Yan,S., Shao,H., Zhou,Z., Wang,Q., Zhao,L., Yang,X.	Journal of Functional Foods	42	2018	Non-extractable polyphenols of green tea and their antioxidant, anti-α-glucosidase capacity, and release during in vitro digestion
51890	Tea	Camellia sinensis (L.) Kuntze	Extractable polyphenols (EPP)	49270000	µmole/kg FW	FRAP assay	Leaf	WHOLE	Green tea	COFFEE, TEA, COCOA	NOT HEAT-TREATED	RAW MATERIAL	TREATMENT APPLIED NOT KNOWN	PRESERVATION METHOD NOT KNOWN		C1303	Yan,S., Shao,H., Zhou,Z., Wang,Q., Zhao,L., Yang,X.	Journal of Functional Foods	42	2018	Non-extractable polyphenols of green tea and their antioxidant, anti-α-glucosidase capacity, and release during in vitro digestion
51891	Tea	Camellia sinensis (L.) Kuntze	Hydrolysable polyphenols (HPP)	16.73	µmole/kg DW	FRAP assay	Leaf	WHOLE	Green tea	COFFEE, TEA, COCOA	NOT HEAT-TREATED	RAW MATERIAL	TREATMENT APPLIED NOT KNOWN	PRESERVATION METHOD NOT KNOWN		C1303	Yan,S., Shao,H., Zhou,Z., Wang,Q., Zhao,L., Yang,X.	Journal of Functional Foods	42	2018	Non-extractable polyphenols of green tea and their antioxidant, anti-α-glucosidase capacity, and release during in vitro digestion
51889	Tea	Camellia sinensis (L.) Kuntze	Hydrolysable polyphenols (HPP)	71.36	mg/l	ABTS assay	Leaf	WHOLE	Green tea	COFFEE, TEA, COCOA	NOT HEAT-TREATED	RAW MATERIAL	TREATMENT APPLIED NOT KNOWN	PRESERVATION METHOD NOT KNOWN		C1303	Yan,S., Shao,H., Zhou,Z., Wang,Q., Zhao,L., Yang,X.	Journal of Functional Foods	42	2018	Non-extractable polyphenols of green tea and their antioxidant, anti-α-glucosidase capacity, and release during in vitro digestion
51885	Tea	Camellia sinensis (L.) Kuntze	Hydrolysable polyphenols (HPP)	15380	mg/kg DW	Folin-Ciocalteu assay	Leaf	WHOLE	Green tea	COFFEE, TEA, COCOA	NOT HEAT-TREATED	RAW MATERIAL	TREATMENT APPLIED NOT KNOWN	PRESERVATION METHOD NOT KNOWN		C1303	Yan,S., Shao,H., Zhou,Z., Wang,Q., Zhao,L., Yang,X.	Journal of Functional Foods	42	2018	Non-extractable polyphenols of green tea and their antioxidant, anti-α-glucosidase capacity, and release during in vitro digestion
51887	Tea	Camellia sinensis (L.) Kuntze	Non-extractable polyphenols (NEPP)	63.95	mg/l	DPPH assay	Leaf	WHOLE	Green tea	COFFEE, TEA, COCOA	NOT HEAT-TREATED	RAW MATERIAL	TREATMENT APPLIED NOT KNOWN	PRESERVATION METHOD NOT KNOWN		C1303	Yan,S., Shao,H., Zhou,Z., Wang,Q., Zhao,L., Yang,X.	Journal of Functional Foods	42	2018	Non-extractable polyphenols of green tea and their antioxidant, anti-α-glucosidase capacity, and release during in vitro digestion
51373	Tomato	Lycopersicon esculentum Mill.	Extractable polyphenols (EPP)	2521	mg/kg DW	Folin-Ciocalteu assay	Fruit or berry	WHOLE		VEGETABLE (EXCLUDING POTATO)	NOT HEAT-TREATED	RAW MATERIAL	NO TREATMENT APPLIED	NO PRESERVATION METHOD USED		C1290	Pérez-Jiménez,J., Saura-Calixto,F.	Food Research International	74	2015	Macromolecular antioxidants or non-extractable polyphenols in fruit and vegetables: Intake in four European countries
51425	Tomato	Lycopersicon esculentum Mill.	Extractable polyphenols (EPP)	40800	µmole/kg DW	ORAC assay	Fruit or berry	WHOLE		VEGETABLE (EXCLUDING POTATO)	NOT HEAT-TREATED	RAW MATERIAL	NO TREATMENT APPLIED	NO PRESERVATION METHOD USED		C1290	Pérez-Jiménez,J., Saura-Calixto,F.	Food Research International	74	2015	Macromolecular antioxidants or non-extractable polyphenols in fruit and vegetables: Intake in four European countries
51397	Tomato	Lycopersicon esculentum Mill.	Hydrolysable polyphenols (HPP)	3795	mg/kg DW	Folin-Ciocalteu assay	Fruit or berry	WHOLE		VEGETABLE (EXCLUDING POTATO)	NOT HEAT-TREATED	RAW MATERIAL	NO TREATMENT APPLIED	NO PRESERVATION METHOD USED		C1290	Pérez-Jiménez,J., Saura-Calixto,F.	Food Research International	74	2015	Macromolecular antioxidants or non-extractable polyphenols in fruit and vegetables: Intake in four European countries
51449	Tomato	Lycopersicon esculentum Mill.	Hydrolysable polyphenols (HPP)	31500	µmole/kg DW	ORAC assay	Fruit or berry	WHOLE		VEGETABLE (EXCLUDING POTATO)	NOT HEAT-TREATED	RAW MATERIAL	NO TREATMENT APPLIED	NO PRESERVATION METHOD USED		C1290	Pérez-Jiménez,J., Saura-Calixto,F.	Food Research International	74	2015	Macromolecular antioxidants or non-extractable polyphenols in fruit and vegetables: Intake in four European countries
51374	Watermelon	Citrullus lanatus (Thunb.) Matsum. & Nakai ssp. lanatus	Extractable polyphenols (EPP)	1120	mg/kg DW	Folin-Ciocalteu assay	Fruit or berry	WHOLE		FRUIT OR FRUIT PRODUCT	NOT HEAT-TREATED	RAW MATERIAL	NO TREATMENT APPLIED	NO PRESERVATION METHOD USED		C1290	Pérez-Jiménez,J., Saura-Calixto,F.	Food Research International	74	2015	Macromolecular antioxidants or non-extractable polyphenols in fruit and vegetables: Intake in four European countries
51424	Watermelon	Citrullus lanatus (Thunb.) Matsum. & Nakai ssp. lanatus	Extractable polyphenols (EPP)	18400	µmole/kg DW	ORAC assay	Fruit or berry	WHOLE		FRUIT OR FRUIT PRODUCT	NOT HEAT-TREATED	RAW MATERIAL	NO TREATMENT APPLIED	NO PRESERVATION METHOD USED		C1290	Pérez-Jiménez,J., Saura-Calixto,F.	Food Research International	74	2015	Macromolecular antioxidants or non-extractable polyphenols in fruit and vegetables: Intake in four European countries
51396	Watermelon	Citrullus lanatus (Thunb.) Matsum. & Nakai ssp. lanatus	Hydrolysable polyphenols (HPP)	327	mg/kg DW	Folin-Ciocalteu assay	Fruit or berry	WHOLE		FRUIT OR FRUIT PRODUCT	NOT HEAT-TREATED	RAW MATERIAL	NO TREATMENT APPLIED	NO PRESERVATION METHOD USED		C1290	Pérez-Jiménez,J., Saura-Calixto,F.	Food Research International	74	2015	Macromolecular antioxidants or non-extractable polyphenols in fruit and vegetables: Intake in four European countries
51451	Watermelon	Citrullus lanatus (Thunb.) Matsum. & Nakai ssp. lanatus	Hydrolysable polyphenols (HPP)	11100	µmole/kg DW	ORAC assay	Fruit or berry	WHOLE		FRUIT OR FRUIT PRODUCT	NOT HEAT-TREATED	RAW MATERIAL	NO TREATMENT APPLIED	NO PRESERVATION METHOD USED		C1290	Pérez-Jiménez,J., Saura-Calixto,F.	Food Research International	74	2015	Macromolecular antioxidants or non-extractable polyphenols in fruit and vegetables: Intake in four European countries
51469	Wheat	Triticum aestivum L. ssp. aestivum	Extractable polyphenols (EPP)	2800	mg/kg DW	Folin-Ciocalteu assay	Bran	WHOLE		GRAIN OR GRAIN PRODUCT	NOT HEAT-TREATED	RAW MATERIAL	TREATMENT APPLIED NOT KNOWN	PRESERVATION METHOD NOT KNOWN		C1294	Pérez-Jiménez,J., Saura-Calixto,F.	Journal of Agricultural and Food Chemistry	53	2005	Literature Data May Underestimate the Actual Antioxidant Capacity of Cereals
51473	Wheat	Triticum aestivum L. ssp. aestivum	Extractable polyphenols (EPP)	4410	µmole/kg DW	FRAP assay	Bran	WHOLE		GRAIN OR GRAIN PRODUCT	NOT HEAT-TREATED	RAW MATERIAL	TREATMENT APPLIED NOT KNOWN	PRESERVATION METHOD NOT KNOWN		C1294	Pérez-Jiménez,J., Saura-Calixto,F.	Journal of Agricultural and Food Chemistry	53	2005	Literature Data May Underestimate the Actual Antioxidant Capacity of Cereals
51714	Wheat	Triticum aestivum L. ssp. aestivum	Extractable polyphenols (EPP)	1020.7	mg/kg DW	Folin-Ciocalteu assay	Seed or kernel	FINELY GROUND	Ruscia 2(Ruscia 1 after 4 years of phenotypic selection) flour	GRAIN OR GRAIN PRODUCT	NOT HEAT-TREATED	RAW MATERIAL	TREATMENT APPLIED NOT KNOWN	PRESERVATION METHOD NOT KNOWN		C1302	Durazzo,A., Casale,G., Melini,V., Maiani,G., Acquistucci,R.	Foods	4	2015	Evaluation of Antioxidant Properties in Cereals: Study of Some Traditional Italian Wheats
51542	Wheat	Triticum aestivum L. ssp. aestivum	Extractable polyphenols (EPP)	1292.8	mg/kg DW	Folin-Ciocalteu assay	Seed or kernel	FINELY GROUND	Laboratory produced wheat flour	GRAIN OR GRAIN PRODUCT	NOT HEAT-TREATED	RAW MATERIAL	TREATMENT APPLIED NOT KNOWN	PRESERVATION METHOD NOT KNOWN		C1296	Durazzo,A., Casale,G., Melini,V., Maiani,G., Acquistucci,R.	Italian Journal of Food Science	28	2016	Total polyphenol content and antioxidant properties of Solina (Triticum aestivum L.) and derivatives thereof
51543	Wheat	Triticum aestivum L. ssp. aestivum	Extractable polyphenols (EPP)	1308.7	mg/kg DW	Folin-Ciocalteu assay	Seed or kernel	FINELY GROUND	Laboratory produced whaet flour	GRAIN OR GRAIN PRODUCT	NOT HEAT-TREATED	RAW MATERIAL	TREATMENT APPLIED NOT KNOWN	PRESERVATION METHOD NOT KNOWN		C1296	Durazzo,A., Casale,G., Melini,V., Maiani,G., Acquistucci,R.	Italian Journal of Food Science	28	2016	Total polyphenol content and antioxidant properties of Solina (Triticum aestivum L.) and derivatives thereof
51665	Wheat	Triticum aestivum L. ssp. aestivum	Extractable polyphenols (EPP)	1456	mg/kg DW	Folin-Ciocalteu assay	Seed or kernel	FINELY GROUND	Ruscia 1(1 part durum wheat, and 2 of soft wheat) flour	GRAIN OR GRAIN PRODUCT	NOT HEAT-TREATED	RAW MATERIAL	TREATMENT APPLIED NOT KNOWN	PRESERVATION METHOD NOT KNOWN		C1302	Durazzo,A., Casale,G., Melini,V., Maiani,G., Acquistucci,R.	Foods	4	2015	Evaluation of Antioxidant Properties in Cereals: Study of Some Traditional Italian Wheats
51713	Wheat	Triticum aestivum L. ssp. aestivum	Extractable polyphenols (EPP)	1494.6	mg/kg DW	Folin-Ciocalteu assay	Seed or kernel	WHOLE	Ruscia 2(Ruscia 1 after 4 years of phenotypic selection)	GRAIN OR GRAIN PRODUCT	NOT HEAT-TREATED	RAW MATERIAL	NO TREATMENT APPLIED	NO PRESERVATION METHOD USED		C1302	Durazzo,A., Casale,G., Melini,V., Maiani,G., Acquistucci,R.	Foods	4	2015	Evaluation of Antioxidant Properties in Cereals: Study of Some Traditional Italian Wheats
51544	Wheat	Triticum aestivum L. ssp. aestivum	Extractable polyphenols (EPP)	1552.4	mg/kg DW	Folin-Ciocalteu assay	Seed or kernel	FINELY GROUND	Laboratory produced wheat flour	GRAIN OR GRAIN PRODUCT	NOT HEAT-TREATED	RAW MATERIAL	TREATMENT APPLIED NOT KNOWN	PRESERVATION METHOD NOT KNOWN		C1296	Durazzo,A., Casale,G., Melini,V., Maiani,G., Acquistucci,R.	Italian Journal of Food Science	28	2016	Total polyphenol content and antioxidant properties of Solina (Triticum aestivum L.) and derivatives thereof
51350	Wheat	Triticum aestivum L. ssp. aestivum	Extractable polyphenols (EPP)	1581	mg/kg DW	Folin-Ciocalteu assay	Seed or kernel	FINELY GROUND	Commercial soft wheat flour	FLOUR OR STARCH	NOT HEAT-TREATED	RAW MATERIAL	TREATMENT APPLIED NOT KNOWN	PRESERVATION METHOD NOT KNOWN		C1285	Durazzo,A., Turfani,V., Azzini,E., Maiani,G., Carcea,M.	Food Chemistry	140	2013	Phenols, lignans and antioxidant properties of legume and sweet chestnut flours
51471	Wheat	Triticum aestivum L. ssp. aestivum	Extractable polyphenols (EPP)	1630	µmole/kg DW	FRAP assay	Seed or kernel	FINELY GROUND	commercial wheat flour	FLOUR OR STARCH	NOT HEAT-TREATED	RAW MATERIAL	TREATMENT APPLIED NOT KNOWN	PRESERVATION METHOD NOT KNOWN		C1294	Pérez-Jiménez,J., Saura-Calixto,F.	Journal of Agricultural and Food Chemistry	53	2005	Literature Data May Underestimate the Actual Antioxidant Capacity of Cereals
51540	Wheat	Triticum aestivum L. ssp. aestivum	Extractable polyphenols (EPP)	1655.7	mg/kg DW	Folin-Ciocalteu assay	Seed or kernel	WHOLE		GRAIN OR GRAIN PRODUCT	NOT HEAT-TREATED	RAW MATERIAL	NO TREATMENT APPLIED	NO PRESERVATION METHOD USED		C1296	Durazzo,A., Casale,G., Melini,V., Maiani,G., Acquistucci,R.	Italian Journal of Food Science	28	2016	Total polyphenol content and antioxidant properties of Solina (Triticum aestivum L.) and derivatives thereof
51539	Wheat	Triticum aestivum L. ssp. aestivum	Extractable polyphenols (EPP)	1704.3	mg/kg DW	Folin-Ciocalteu assay	Seed or kernel	WHOLE		GRAIN OR GRAIN PRODUCT	NOT HEAT-TREATED	RAW MATERIAL	NO TREATMENT APPLIED	NO PRESERVATION METHOD USED		C1296	Durazzo,A., Casale,G., Melini,V., Maiani,G., Acquistucci,R.	Italian Journal of Food Science	28	2016	Total polyphenol content and antioxidant properties of Solina (Triticum aestivum L.) and derivatives thereof
51663	Wheat	Triticum aestivum L. ssp. aestivum	Extractable polyphenols (EPP)	1758.5	mg/kg DW	Folin-Ciocalteu assay	Seed or kernel	WHOLE	Ruscia 1(1 part durum wheat, and 2 of soft wheat)	GRAIN OR GRAIN PRODUCT	NOT HEAT-TREATED	RAW MATERIAL	NO TREATMENT APPLIED	NO PRESERVATION METHOD USED		C1302	Durazzo,A., Casale,G., Melini,V., Maiani,G., Acquistucci,R.	Foods	4	2015	Evaluation of Antioxidant Properties in Cereals: Study of Some Traditional Italian Wheats
51541	Wheat	Triticum aestivum L. ssp. aestivum	Extractable polyphenols (EPP)	1837.5	mg/kg DW	Folin-Ciocalteu assay	Seed or kernel	WHOLE		GRAIN OR GRAIN PRODUCT	NOT HEAT-TREATED	RAW MATERIAL	NO TREATMENT APPLIED	NO PRESERVATION METHOD USED		C1296	Durazzo,A., Casale,G., Melini,V., Maiani,G., Acquistucci,R.	Italian Journal of Food Science	28	2016	Total polyphenol content and antioxidant properties of Solina (Triticum aestivum L.) and derivatives thereof
51716	Wheat	Triticum aestivum L. ssp. aestivum	Extractable polyphenols (EPP)	2180	µmole/kg DW	FRAP assay	Seed or kernel	FINELY GROUND	Ruscia 2(Ruscia 1 after 4 years of phenotypic selection) flour	GRAIN OR GRAIN PRODUCT	NOT HEAT-TREATED	RAW MATERIAL	TREATMENT APPLIED NOT KNOWN	PRESERVATION METHOD NOT KNOWN		C1302	Durazzo,A., Casale,G., Melini,V., Maiani,G., Acquistucci,R.	Foods	4	2015	Evaluation of Antioxidant Properties in Cereals: Study of Some Traditional Italian Wheats
51351	Wheat	Triticum aestivum L. ssp. aestivum	Extractable polyphenols (EPP)	2280	µmole/kg DW	FRAP assay	Seed or kernel	FINELY GROUND	Commercial soft wheat flour	FLOUR OR STARCH	NOT HEAT-TREATED	RAW MATERIAL	TREATMENT APPLIED NOT KNOWN	PRESERVATION METHOD NOT KNOWN		C1285	Durazzo,A., Turfani,V., Azzini,E., Maiani,G., Carcea,M.	Food Chemistry	140	2013	Phenols, lignans and antioxidant properties of legume and sweet chestnut flours
51550	Wheat	Triticum aestivum L. ssp. aestivum	Extractable polyphenols (EPP)	2310	µmole/kg DW	FRAP assay	Seed or kernel	FINELY GROUND	Laboratory produced wheat flour	GRAIN OR GRAIN PRODUCT	NOT HEAT-TREATED	RAW MATERIAL	TREATMENT APPLIED NOT KNOWN	PRESERVATION METHOD NOT KNOWN		C1296	Durazzo,A., Casale,G., Melini,V., Maiani,G., Acquistucci,R.	Italian Journal of Food Science	28	2016	Total polyphenol content and antioxidant properties of Solina (Triticum aestivum L.) and derivatives thereof
51549	Wheat	Triticum aestivum L. ssp. aestivum	Extractable polyphenols (EPP)	2350	µmole/kg DW	FRAP assay	Seed or kernel	FINELY GROUND	Laboratory produced whaet flour	GRAIN OR GRAIN PRODUCT	NOT HEAT-TREATED	RAW MATERIAL	TREATMENT APPLIED NOT KNOWN	PRESERVATION METHOD NOT KNOWN		C1296	Durazzo,A., Casale,G., Melini,V., Maiani,G., Acquistucci,R.	Italian Journal of Food Science	28	2016	Total polyphenol content and antioxidant properties of Solina (Triticum aestivum L.) and derivatives thereof
51548	Wheat	Triticum aestivum L. ssp. aestivum	Extractable polyphenols (EPP)	2750	µmole/kg DW	FRAP assay	Seed or kernel	FINELY GROUND	Laboratory produced wheat flour	GRAIN OR GRAIN PRODUCT	NOT HEAT-TREATED	RAW MATERIAL	TREATMENT APPLIED NOT KNOWN	PRESERVATION METHOD NOT KNOWN		C1296	Durazzo,A., Casale,G., Melini,V., Maiani,G., Acquistucci,R.	Italian Journal of Food Science	28	2016	Total polyphenol content and antioxidant properties of Solina (Triticum aestivum L.) and derivatives thereof
51467	Wheat	Triticum aestivum L. ssp. aestivum	Extractable polyphenols (EPP)	3440	mg/kg DW	Folin-Ciocalteu assay	Seed or kernel	FINELY GROUND	commercial wheat flour	FLOUR OR STARCH	NOT HEAT-TREATED	RAW MATERIAL	TREATMENT APPLIED NOT KNOWN	PRESERVATION METHOD NOT KNOWN		C1294	Pérez-Jiménez,J., Saura-Calixto,F.	Journal of Agricultural and Food Chemistry	53	2005	Literature Data May Underestimate the Actual Antioxidant Capacity of Cereals
51667	Wheat	Triticum aestivum L. ssp. aestivum	Extractable polyphenols (EPP)	4440	µmole/kg DW	FRAP assay	Seed or kernel	FINELY GROUND	Ruscia 1(1 part durum wheat, and 2 of soft wheat) flour	GRAIN OR GRAIN PRODUCT	NOT HEAT-TREATED	RAW MATERIAL	TREATMENT APPLIED NOT KNOWN	PRESERVATION METHOD NOT KNOWN		C1302	Durazzo,A., Casale,G., Melini,V., Maiani,G., Acquistucci,R.	Foods	4	2015	Evaluation of Antioxidant Properties in Cereals: Study of Some Traditional Italian Wheats
51715	Wheat	Triticum aestivum L. ssp. aestivum	Extractable polyphenols (EPP)	4460	µmole/kg DW	FRAP assay	Seed or kernel	WHOLE	Ruscia 2(Ruscia 1 after 4 years of phenotypic selection)	GRAIN OR GRAIN PRODUCT	NOT HEAT-TREATED	RAW MATERIAL	NO TREATMENT APPLIED	NO PRESERVATION METHOD USED		C1302	Durazzo,A., Casale,G., Melini,V., Maiani,G., Acquistucci,R.	Foods	4	2015	Evaluation of Antioxidant Properties in Cereals: Study of Some Traditional Italian Wheats
51664	Wheat	Triticum aestivum L. ssp. aestivum	Extractable polyphenols (EPP)	5280	µmole/kg DW	FRAP assay	Seed or kernel	WHOLE	Ruscia 1(1 part durum wheat, and 2 of soft wheat)	GRAIN OR GRAIN PRODUCT	NOT HEAT-TREATED	RAW MATERIAL	NO TREATMENT APPLIED	NO PRESERVATION METHOD USED		C1302	Durazzo,A., Casale,G., Melini,V., Maiani,G., Acquistucci,R.	Foods	4	2015	Evaluation of Antioxidant Properties in Cereals: Study of Some Traditional Italian Wheats
51546	Wheat	Triticum aestivum L. ssp. aestivum	Extractable polyphenols (EPP)	6340	µmole/kg DW	FRAP assay	Seed or kernel	WHOLE		GRAIN OR GRAIN PRODUCT	NOT HEAT-TREATED	RAW MATERIAL	NO TREATMENT APPLIED	NO PRESERVATION METHOD USED		C1296	Durazzo,A., Casale,G., Melini,V., Maiani,G., Acquistucci,R.	Italian Journal of Food Science	28	2016	Total polyphenol content and antioxidant properties of Solina (Triticum aestivum L.) and derivatives thereof
51547	Wheat	Triticum aestivum L. ssp. aestivum	Extractable polyphenols (EPP)	6470	µmole/kg DW	FRAP assay	Seed or kernel	WHOLE		GRAIN OR GRAIN PRODUCT	NOT HEAT-TREATED	RAW MATERIAL	NO TREATMENT APPLIED	NO PRESERVATION METHOD USED		C1296	Durazzo,A., Casale,G., Melini,V., Maiani,G., Acquistucci,R.	Italian Journal of Food Science	28	2016	Total polyphenol content and antioxidant properties of Solina (Triticum aestivum L.) and derivatives thereof
51545	Wheat	Triticum aestivum L. ssp. aestivum	Extractable polyphenols (EPP)	6600	µmole/kg DW	FRAP assay	Seed or kernel	WHOLE		GRAIN OR GRAIN PRODUCT	NOT HEAT-TREATED	RAW MATERIAL	NO TREATMENT APPLIED	NO PRESERVATION METHOD USED		C1296	Durazzo,A., Casale,G., Melini,V., Maiani,G., Acquistucci,R.	Italian Journal of Food Science	28	2016	Total polyphenol content and antioxidant properties of Solina (Triticum aestivum L.) and derivatives thereof
51499	Wheat	Triticum aestivum L. ssp. aestivum	Hydrolysable polyphenols (HPP)	2510	mg/kg DW	Folin-Ciocalteu assay	Seed or kernel	FINELY GROUND		GRAIN OR GRAIN PRODUCT	NOT HEAT-TREATED	RAW MATERIAL	TREATMENT APPLIED NOT KNOWN	PRESERVATION METHOD NOT KNOWN		C1294	Pérez-Jiménez,J., Saura-Calixto,F.	Journal of Agricultural and Food Chemistry	53	2005	Literature Data May Underestimate the Actual Antioxidant Capacity of Cereals
51349	Wheat	Triticum aestivum L. ssp. aestivum	Hydrolysable polyphenols (HPP)	3820	µmole/kg DW	FRAP assay	Seed or kernel	FINELY GROUND	Commercial soft wheat flour	FLOUR OR STARCH	NOT HEAT-TREATED	RAW MATERIAL	TREATMENT APPLIED NOT KNOWN	PRESERVATION METHOD NOT KNOWN		C1285	Durazzo,A., Turfani,V., Azzini,E., Maiani,G., Carcea,M.	Food Chemistry	140	2013	Phenols, lignans and antioxidant properties of legume and sweet chestnut flours
51348	Wheat	Triticum aestivum L. ssp. aestivum	Hydrolysable polyphenols (HPP)	5182.6	mg/kg DW	Folin-Ciocalteu assay	Seed or kernel	FINELY GROUND	Commercial soft wheat flour	FLOUR OR STARCH	NOT HEAT-TREATED	RAW MATERIAL	TREATMENT APPLIED NOT KNOWN	PRESERVATION METHOD NOT KNOWN		C1285	Durazzo,A., Turfani,V., Azzini,E., Maiani,G., Carcea,M.	Food Chemistry	140	2013	Phenols, lignans and antioxidant properties of legume and sweet chestnut flours
51556	Wheat	Triticum aestivum L. ssp. aestivum	Hydrolysable polyphenols (HPP)	7915	mg/kg DW	Folin-Ciocalteu assay	Seed or kernel	FINELY GROUND	Laboratory produced wheat flour	GRAIN OR GRAIN PRODUCT	NOT HEAT-TREATED	RAW MATERIAL	TREATMENT APPLIED NOT KNOWN	PRESERVATION METHOD NOT KNOWN		C1296	Durazzo,A., Casale,G., Melini,V., Maiani,G., Acquistucci,R.	Italian Journal of Food Science	28	2016	Total polyphenol content and antioxidant properties of Solina (Triticum aestivum L.) and derivatives thereof
51555	Wheat	Triticum aestivum L. ssp. aestivum	Hydrolysable polyphenols (HPP)	8116.5	mg/kg DW	Folin-Ciocalteu assay	Seed or kernel	FINELY GROUND	Laboratory produced whaet flour	GRAIN OR GRAIN PRODUCT	NOT HEAT-TREATED	RAW MATERIAL	TREATMENT APPLIED NOT KNOWN	PRESERVATION METHOD NOT KNOWN		C1296	Durazzo,A., Casale,G., Melini,V., Maiani,G., Acquistucci,R.	Italian Journal of Food Science	28	2016	Total polyphenol content and antioxidant properties of Solina (Triticum aestivum L.) and derivatives thereof
51503	Wheat	Triticum aestivum L. ssp. aestivum	Hydrolysable polyphenols (HPP)	8920	µmole/kg DW	FRAP assay	Seed or kernel	FINELY GROUND		GRAIN OR GRAIN PRODUCT	NOT HEAT-TREATED	RAW MATERIAL	TREATMENT APPLIED NOT KNOWN	PRESERVATION METHOD NOT KNOWN		C1294	Pérez-Jiménez,J., Saura-Calixto,F.	Journal of Agricultural and Food Chemistry	53	2005	Literature Data May Underestimate the Actual Antioxidant Capacity of Cereals
51717	Wheat	Triticum aestivum L. ssp. aestivum	Hydrolysable polyphenols (HPP)	9525.4	mg/kg DW	Folin-Ciocalteu assay	Seed or kernel	WHOLE	Ruscia 1(1 part durum wheat, and 2 of soft wheat)	GRAIN OR GRAIN PRODUCT	NOT HEAT-TREATED	RAW MATERIAL	NO TREATMENT APPLIED	NO PRESERVATION METHOD USED		C1302	Durazzo,A., Casale,G., Melini,V., Maiani,G., Acquistucci,R.	Foods	4	2015	Evaluation of Antioxidant Properties in Cereals: Study of Some Traditional Italian Wheats
51554	Wheat	Triticum aestivum L. ssp. aestivum	Hydrolysable polyphenols (HPP)	9810.1	mg/kg DW	Folin-Ciocalteu assay	Seed or kernel	FINELY GROUND	Laboratory produced wheat flour	GRAIN OR GRAIN PRODUCT	NOT HEAT-TREATED	RAW MATERIAL	TREATMENT APPLIED NOT KNOWN	PRESERVATION METHOD NOT KNOWN		C1296	Durazzo,A., Casale,G., Melini,V., Maiani,G., Acquistucci,R.	Italian Journal of Food Science	28	2016	Total polyphenol content and antioxidant properties of Solina (Triticum aestivum L.) and derivatives thereof
51710	Wheat	Triticum aestivum L. ssp. aestivum	Hydrolysable polyphenols (HPP)	10361.9	mg/kg DW	Folin-Ciocalteu assay	Seed or kernel	WHOLE	Ruscia 1(1 part durum wheat, and 2 of soft wheat)	GRAIN OR GRAIN PRODUCT	NOT HEAT-TREATED	RAW MATERIAL	NO TREATMENT APPLIED	NO PRESERVATION METHOD USED		C1302	Durazzo,A., Casale,G., Melini,V., Maiani,G., Acquistucci,R.	Foods	4	2015	Evaluation of Antioxidant Properties in Cereals: Study of Some Traditional Italian Wheats
51552	Wheat	Triticum aestivum L. ssp. aestivum	Hydrolysable polyphenols (HPP)	10844.2	mg/kg DW	Folin-Ciocalteu assay	Seed or kernel	WHOLE		GRAIN OR GRAIN PRODUCT	NOT HEAT-TREATED	RAW MATERIAL	NO TREATMENT APPLIED	NO PRESERVATION METHOD USED		C1296	Durazzo,A., Casale,G., Melini,V., Maiani,G., Acquistucci,R.	Italian Journal of Food Science	28	2016	Total polyphenol content and antioxidant properties of Solina (Triticum aestivum L.) and derivatives thereof
51718	Wheat	Triticum aestivum L. ssp. aestivum	Hydrolysable polyphenols (HPP)	11421.9	mg/kg DW	Folin-Ciocalteu assay	Seed or kernel	FINELY GROUND	Ruscia 1(1 part durum wheat, and 2 of soft wheat) flour	GRAIN OR GRAIN PRODUCT	NOT HEAT-TREATED	RAW MATERIAL	TREATMENT APPLIED NOT KNOWN	PRESERVATION METHOD NOT KNOWN		C1302	Durazzo,A., Casale,G., Melini,V., Maiani,G., Acquistucci,R.	Foods	4	2015	Evaluation of Antioxidant Properties in Cereals: Study of Some Traditional Italian Wheats
51666	Wheat	Triticum aestivum L. ssp. aestivum	Hydrolysable polyphenols (HPP)	11613.9	mg/kg DW	Folin-Ciocalteu assay	Seed or kernel	FINELY GROUND	Ruscia 1(1 part durum wheat, and 2 of soft wheat) flour	GRAIN OR GRAIN PRODUCT	NOT HEAT-TREATED	RAW MATERIAL	TREATMENT APPLIED NOT KNOWN	PRESERVATION METHOD NOT KNOWN		C1302	Durazzo,A., Casale,G., Melini,V., Maiani,G., Acquistucci,R.	Foods	4	2015	Evaluation of Antioxidant Properties in Cereals: Study of Some Traditional Italian Wheats
51553	Wheat	Triticum aestivum L. ssp. aestivum	Hydrolysable polyphenols (HPP)	11987.3	mg/kg DW	Folin-Ciocalteu assay	Seed or kernel	WHOLE		GRAIN OR GRAIN PRODUCT	NOT HEAT-TREATED	RAW MATERIAL	NO TREATMENT APPLIED	NO PRESERVATION METHOD USED		C1296	Durazzo,A., Casale,G., Melini,V., Maiani,G., Acquistucci,R.	Italian Journal of Food Science	28	2016	Total polyphenol content and antioxidant properties of Solina (Triticum aestivum L.) and derivatives thereof
51551	Wheat	Triticum aestivum L. ssp. aestivum	Hydrolysable polyphenols (HPP)	13253.2	mg/kg DW	Folin-Ciocalteu assay	Seed or kernel	WHOLE		GRAIN OR GRAIN PRODUCT	NOT HEAT-TREATED	RAW MATERIAL	NO TREATMENT APPLIED	NO PRESERVATION METHOD USED		C1296	Durazzo,A., Casale,G., Melini,V., Maiani,G., Acquistucci,R.	Italian Journal of Food Science	28	2016	Total polyphenol content and antioxidant properties of Solina (Triticum aestivum L.) and derivatives thereof
51501	Wheat	Triticum aestivum L. ssp. aestivum	Hydrolysable polyphenols (HPP)	16430	mg/kg DW	Folin-Ciocalteu assay	Seed or kernel	FINELY GROUND		GRAIN OR GRAIN PRODUCT	NOT HEAT-TREATED	RAW MATERIAL	TREATMENT APPLIED NOT KNOWN	PRESERVATION METHOD NOT KNOWN		C1294	Pérez-Jiménez,J., Saura-Calixto,F.	Journal of Agricultural and Food Chemistry	53	2005	Literature Data May Underestimate the Actual Antioxidant Capacity of Cereals
51558	Wheat	Triticum aestivum L. ssp. aestivum	Hydrolysable polyphenols (HPP)	85060	µmole/kg DW	FRAP assay	Seed or kernel	WHOLE		GRAIN OR GRAIN PRODUCT	NOT HEAT-TREATED	RAW MATERIAL	NO TREATMENT APPLIED	NO PRESERVATION METHOD USED		C1296	Durazzo,A., Casale,G., Melini,V., Maiani,G., Acquistucci,R.	Italian Journal of Food Science	28	2016	Total polyphenol content and antioxidant properties of Solina (Triticum aestivum L.) and derivatives thereof
51719	Wheat	Triticum aestivum L. ssp. aestivum	Hydrolysable polyphenols (HPP)	85450	µmole/kg DW	FRAP assay	Seed or kernel	WHOLE	Ruscia 1(1 part durum wheat, and 2 of soft wheat)	GRAIN OR GRAIN PRODUCT	NOT HEAT-TREATED	RAW MATERIAL	NO TREATMENT APPLIED	NO PRESERVATION METHOD USED		C1302	Durazzo,A., Casale,G., Melini,V., Maiani,G., Acquistucci,R.	Foods	4	2015	Evaluation of Antioxidant Properties in Cereals: Study of Some Traditional Italian Wheats
51559	Wheat	Triticum aestivum L. ssp. aestivum	Hydrolysable polyphenols (HPP)	90400	µmole/kg DW	FRAP assay	Seed or kernel	WHOLE		GRAIN OR GRAIN PRODUCT	NOT HEAT-TREATED	RAW MATERIAL	NO TREATMENT APPLIED	NO PRESERVATION METHOD USED		C1296	Durazzo,A., Casale,G., Melini,V., Maiani,G., Acquistucci,R.	Italian Journal of Food Science	28	2016	Total polyphenol content and antioxidant properties of Solina (Triticum aestivum L.) and derivatives thereof
51711	Wheat	Triticum aestivum L. ssp. aestivum	Hydrolysable polyphenols (HPP)	96790	µmole/kg DW	FRAP assay	Seed or kernel	WHOLE	Ruscia 1(1 part durum wheat, and 2 of soft wheat)	GRAIN OR GRAIN PRODUCT	NOT HEAT-TREATED	RAW MATERIAL	NO TREATMENT APPLIED	NO PRESERVATION METHOD USED		C1302	Durazzo,A., Casale,G., Melini,V., Maiani,G., Acquistucci,R.	Foods	4	2015	Evaluation of Antioxidant Properties in Cereals: Study of Some Traditional Italian Wheats
51561	Wheat	Triticum aestivum L. ssp. aestivum	Hydrolysable polyphenols (HPP)	99200	µmole/kg DW	FRAP assay	Seed or kernel	FINELY GROUND	Laboratory produced whaet flour	GRAIN OR GRAIN PRODUCT	NOT HEAT-TREATED	RAW MATERIAL	TREATMENT APPLIED NOT KNOWN	PRESERVATION METHOD NOT KNOWN		C1296	Durazzo,A., Casale,G., Melini,V., Maiani,G., Acquistucci,R.	Italian Journal of Food Science	28	2016	Total polyphenol content and antioxidant properties of Solina (Triticum aestivum L.) and derivatives thereof
51505	Wheat	Triticum aestivum L. ssp. aestivum	Hydrolysable polyphenols (HPP)	108300	µmole/kg DW	FRAP assay	Seed or kernel	FINELY GROUND		GRAIN OR GRAIN PRODUCT	NOT HEAT-TREATED	RAW MATERIAL	TREATMENT APPLIED NOT KNOWN	PRESERVATION METHOD NOT KNOWN		C1294	Pérez-Jiménez,J., Saura-Calixto,F.	Journal of Agricultural and Food Chemistry	53	2005	Literature Data May Underestimate the Actual Antioxidant Capacity of Cereals
51557	Wheat	Triticum aestivum L. ssp. aestivum	Hydrolysable polyphenols (HPP)	109120	µmole/kg DW	FRAP assay	Seed or kernel	WHOLE		GRAIN OR GRAIN PRODUCT	NOT HEAT-TREATED	RAW MATERIAL	NO TREATMENT APPLIED	NO PRESERVATION METHOD USED		C1296	Durazzo,A., Casale,G., Melini,V., Maiani,G., Acquistucci,R.	Italian Journal of Food Science	28	2016	Total polyphenol content and antioxidant properties of Solina (Triticum aestivum L.) and derivatives thereof
51560	Wheat	Triticum aestivum L. ssp. aestivum	Hydrolysable polyphenols (HPP)	114250	µmole/kg DW	FRAP assay	Seed or kernel	FINELY GROUND	Laboratory produced wheat flour	GRAIN OR GRAIN PRODUCT	NOT HEAT-TREATED	RAW MATERIAL	TREATMENT APPLIED NOT KNOWN	PRESERVATION METHOD NOT KNOWN		C1296	Durazzo,A., Casale,G., Melini,V., Maiani,G., Acquistucci,R.	Italian Journal of Food Science	28	2016	Total polyphenol content and antioxidant properties of Solina (Triticum aestivum L.) and derivatives thereof
51562	Wheat	Triticum aestivum L. ssp. aestivum	Hydrolysable polyphenols (HPP)	118290	µmole/kg DW	FRAP assay	Seed or kernel	FINELY GROUND	Laboratory produced wheat flour	GRAIN OR GRAIN PRODUCT	NOT HEAT-TREATED	RAW MATERIAL	TREATMENT APPLIED NOT KNOWN	PRESERVATION METHOD NOT KNOWN		C1296	Durazzo,A., Casale,G., Melini,V., Maiani,G., Acquistucci,R.	Italian Journal of Food Science	28	2016	Total polyphenol content and antioxidant properties of Solina (Triticum aestivum L.) and derivatives thereof
51720	Wheat	Triticum aestivum L. ssp. aestivum	Hydrolysable polyphenols (HPP)	133090	µmole/kg DW	FRAP assay	Seed or kernel	FINELY GROUND	Ruscia 1(1 part durum wheat, and 2 of soft wheat) flour	GRAIN OR GRAIN PRODUCT	NOT HEAT-TREATED	RAW MATERIAL	TREATMENT APPLIED NOT KNOWN	PRESERVATION METHOD NOT KNOWN		C1302	Durazzo,A., Casale,G., Melini,V., Maiani,G., Acquistucci,R.	Foods	4	2015	Evaluation of Antioxidant Properties in Cereals: Study of Some Traditional Italian Wheats
51712	Wheat	Triticum aestivum L. ssp. aestivum	Hydrolysable polyphenols (HPP)	170710	µmole/kg DW	FRAP assay	Seed or kernel	FINELY GROUND	Ruscia 1(1 part durum wheat, and 2 of soft wheat) flour	GRAIN OR GRAIN PRODUCT	NOT HEAT-TREATED	RAW MATERIAL	TREATMENT APPLIED NOT KNOWN	PRESERVATION METHOD NOT KNOWN		C1302	Durazzo,A., Casale,G., Melini,V., Maiani,G., Acquistucci,R.	Foods	4	2015	Evaluation of Antioxidant Properties in Cereals: Study of Some Traditional Italian Wheats
